# Supplementary material
Source: PubMed Central journal article supplement (PMC5841140)
Supplement: brain-2017-00549-file011_awx254.pdf [file brain-2017-00549-file011_awx254.pdf]

## Contents

[Supplementary table 1 - Comorbid neuropathological findings for each patient](#)

[Supplementary table 2 – Additional pathologies found in association with each primary pathological diagnosis](#)

[Supplementary table 3 – Gene mutations and pathogenic variants identified](#)

[Supplementary table 4 – Clinical features by pathological diagnosis](#)

[Supplementary table 5 – Clinical features by pathological diagnosis \(high confidence bvFTD\)](#)

[Supplementary table 6 – Clinical features by pathological diagnosis among patients meeting FTDC possible bvFTD criteria](#)

[Supplementary table 7 – Clinical features by pathological diagnosis among patients meeting FTDC probable bvFTD criteria](#)

[Supplementary table 8 – First symptoms by pathological diagnosis](#)

[Supplementary table 9 – Neuropsychological testing results by pathological diagnosis](#)

[Supplementary table 10 – Neuropsychological testing results by pathological diagnosis among patients meeting FTDC possible bvFTD criteria](#)

[Supplementary table 11 – Neuropsychological testing results by pathological diagnosis among patients meeting FTDC probable bvFTD criteria](#)

[Supplementary table 12 – Components from categorical principal component analysis \(CATPCA\) of clinical data](#)

[Supplementary table 13 – Components from principal component analysis of neuropsychological testing](#)

[Supplementary Table 14 – Discriminant function analysis cross-validated classification accuracy \(percent correctly classified\) by pathological diagnosis \(FTLD vs non-FTLD\) using components derived from specified analyses](#)

[Supplementary Table 15 – Discriminant function analysis cross-validated classification accuracy \(percent correctly classified\) by pathological diagnosis \(major molecular class\) using components derived from specified analyses](#)

**Supplementary Table 1 - Comorbid neuropathological findings for each patient**

| Pathology | ADNC level       | Thal phase | Braak NFT stage | CERAD NP density | NIA-Reagan     | CAA  | CVD                   | Arteriosclerosis level | LBD Stage | AGD stage | Incidental TDP | Incidental diagnoses |
|-----------|------------------|------------|-----------------|------------------|----------------|------|-----------------------|------------------------|-----------|-----------|----------------|----------------------|
| Pick's    | Not-Low          | Unk        | 0               | Absent           | Not met        | Unk  | 0                     | Unk                    | None      | Unk       | Unk            |                      |
| Pick's    | Not-Low          | Unk        | 1               | Absent           | Not applicable | None | 0                     | Unk                    | None      | Unk       | Unk            |                      |
| Pick's    | Not              | 0          | 0               | Absent           | Not met        | None | 0                     | 0                      | None      | Unk       | Unk            |                      |
| Pick's    | Low              | 2          | 0               | Moderate         | Not applicable | Mild | 0                     | 0                      | None      | None      | None           |                      |
| Pick's    | Not-Low          | Unk        | 1-2             | Absent           | Not applicable | None | 0                     | Unk                    | None      | Unk       | Unk            |                      |
| Pick's    | Low              | 3-5        | 1               | Sparse           | Low            | Mild | 1 territorial infarct | Unk                    | None      | Unk       | Unk            | 1                    |
| Pick's    | Not-Low          | Unk        | 0               | Unk              | Unk            | Unk  | 0                     | Unk                    | None      | Unk       | None           |                      |
| Pick's    | Not              | 0          | 0               | Absent           | Not met        | None | 0                     | 0                      | None      | None      | None           |                      |
| CBD       | Not-Low          | Unk        | 0               | Absent           | Not met        | None | 0                     | Unk                    | None      | Unk       | Diffuse - 2    |                      |
| CBD       | Not-Low          | Unk        | 0               | Absent           | Not met        | None | 0                     | Unk                    | None      | Unk       | Unk            |                      |
| CBD       | Low-Intermediate | 1-5        | Unk             | Sparse           | Unk            | Unk  | 0                     | Unk                    |           | Unk       | Unk            |                      |
| CBD       | Not              | 0          | 0               | Absent           | Not met        | None | 0                     | 0                      | None      | Unk       | Unk            |                      |
| CBD       | Low              | 2-5        | 2               | Frequent         | Not applicable | Mild | 0                     | Mild                   | None      | Unk       | Unk            |                      |
| CBD       | Low              | 1          | 2               | Sparse           | Low            | Unk  | 0                     | Unk                    | None      | Unk       | Unk            |                      |
| CBD       | Not              | 0          | 0               | Absent           | Not met        | None | 0                     | Mild                   | None      | Limbic    | Limbic         |                      |
| CBD       | Intermediate     | 3          | 3               | Frequent         | Not applicable | None | 1 microinfarction     | Mild                   | None      | Limbic    | Unk            |                      |
| CBD       | Low              | 2          | 2               | Frequent         | Not applicable | Mild | 0                     | Mild                   | None      | Unk       | Unk            |                      |
| CBD       | Low              | 1          | 2               | Moderate         | Not applicable | Mild | 1 territorial infarct | 0                      | None      | Unk       | Unk            |                      |
| PSP       | Unk              | Unk        |                 | Absent           | Unk            | None | 0                     | Unk                    | None      | Unk       | Unk            |                      |
| PSP       | Not-Low          | Unk        | 1-2             | Absent           | Not applicable | None | 0                     | Unk                    | None      | Unk       | Unk            |                      |

| Pathology          | ADNC level   | Thal phase | Braak NFT stage | CERAD NP density | NIA-Reagan     | CAA    | CVD             | Arteriosclerosis level | LBD Stage    | AGD stage | Incidental TDP | Incidental diagnoses |
|--------------------|--------------|------------|-----------------|------------------|----------------|--------|-----------------|------------------------|--------------|-----------|----------------|----------------------|
| PSP                | Intermediate | 2-5        | 4               | Frequent         | Not applicable | Unk    | 0               | Mild                   | None         | Unk       | None           |                      |
| PSP                | Not-Low      | Unk        | 0               | Absent           | Not met        | Unk    | 0               | Unk                    |              | Unk       | Unk            |                      |
| PSP                | Low-High     | 1-5        | Unk             | Moderate         | Unk            | None   | 0               | Unk                    | None         | Unk       | Unk            |                      |
| PSP                | Not-Low      | Unk        | 0               | Absent           | Not met        | None   | 0               | Unk                    | None         | Unk       | None           |                      |
| PSP                | Intermediate | 4          | 3               | Frequent         | Not applicable | None   | 0               | Moderate               | Transitional | Limbic    | None           |                      |
| PSP                | Low          | 2          | 0               | Sparse           | Not applicable | None   | 0               | Mild                   | None         | None      | None           |                      |
| PSP                | Not-Low      | Unk        | 0               | Absent           | Not met        | Unk    | 0               | Unk                    | Brainstem    | Unk       | None           |                      |
| FTDP-17            | Not-Low      | Unk        | 2               | Absent           | Not applicable | None   | 0               | Unk                    | None         | Unk       | Unk            |                      |
| FTDP-17            | Low          | 1-5        | 1               | Absent           | Not applicable | Unk    | 0               | Unk                    | None         | Unk       | None           |                      |
| FTDP-17            | Low          | 1          | 0               | Absent           | Not met        | None   | 0               | 0                      | Brainstem    | None      | None           |                      |
| AGD                | Low          | 2-3        | 2               | Sparse           | Low            | None   | 1               | Mild                   | None         | Limbic    | None           |                      |
|                    |              |            |                 |                  |                |        | microinfarction |                        |              |           |                |                      |
| Unclassifiable tau | Unk          | Unk        | Unk             | Absent           | Unk            | None   | 0               | Unk                    | Diffuse      | Unk       | Unk            |                      |
| Unclassifiable tau | Low          | 1-3        | 0               | Absent           | Not met        | Unk    | 1               | hemorrhagic stroke     | Unk          | None      | Unk            | Unk                  |
| Unclassifiable tau | Low          | 2          | 1               | Moderate         | Not applicable | Severe | 0               | Severe                 | None         | None      | None           |                      |
| TDP-A              | Low          | 1-2        | 4               | Absent           | Not applicable | Unk    | 0               | Moderate               | None         | Unk       | N/A            |                      |
| TDP-A              | Not-Low      | Unk        | 0               | Absent           | Not met        | None   | 0               | Unk                    | Unk          | Unk       | N/A            |                      |
| TDP-A              | Not-Low      | Unk        | 1               | Absent           | Not applicable | None   | 0               | Unk                    | None         | Unk       | N/A            |                      |
| TDP-A with MND     | Not-Low      | Unk        | 0               | Absent           | Not met        | Unk    | 2               | territorial infarcts   | Unk          | None      | Unk            | N/A                  |
| TDP-A              | Not          | 0          | 1               | Absent           | Not applicable | None   | 0               | Mild                   | None         | Limbic    | N/A            |                      |
| TDP-A              | Not          | 0          | 0               | Absent           | Not met        | None   | 0               | Mild                   | Transitional | None      | N/A            |                      |

| Pathology      | ADNC level       | Thal phase | Braak NFT stage | CERAD NP density | NIA-Reagan     | CAA      | CVD               | Arteriosclerosis level | LBD Stage | AGD stage | Incidental TDP | Incidental diagnoses |
|----------------|------------------|------------|-----------------|------------------|----------------|----------|-------------------|------------------------|-----------|-----------|----------------|----------------------|
| TDP-A          | Low              | 2          | 4               | Sparse           | Not applicable | None     | 0                 | Mild                   | None      | Limbic    | N/A            |                      |
| TDP-A          | Not              | 0          | 1               | Absent           | Not applicable | None     | 0                 | 0                      | None      | Diffuse   | N/A            |                      |
| TDP-A          | Low              | 1          | 0               | Sparse           | Not applicable | None     | 1 microinfarction | Mild                   | None      | None      | N/A            |                      |
| TDP-B          | Not              | 0          | 1               | Absent           | Not applicable | None     | 0                 | Unk                    | None      | Unk       | N/A            |                      |
| TDP-B with MND | Low              | 2          | 3               | Absent           | Not applicable | None     | 0                 | Unk                    | None      | Limbic    | N/A            |                      |
| TDP-B with MND | Low              | 1          | 2               | Absent           | Not applicable | None     | 0                 | Mild                   | Brainstem | None      | N/A            | 3                    |
| TDP-B          | Not-Intermediate | Unk        | 3               | Absent           | Not applicable | Unk      | 0                 | Unk                    | None      | Unk       | N/A            |                      |
| TDP-B with MND | Low              | 2-5        | 0               | Moderate         | Not applicable | Unk      | 0                 | Moderate               | None      | Unk       | N/A            |                      |
| TDP-B with MND | High             | 4          | 6               | Frequent         | High           | Moderate | 0                 | 0                      | None      | Diffuse   | N/A            |                      |
| TDP-B with MND | Low              | 2          | 2               | Sparse           | Low            | None     | 0                 | Mild                   | None      | None      | N/A            |                      |
| TDP-B with MND | Intermediate     | 3          | 3               | Sparse           | Not applicable | None     | 0                 | 2                      | None      | None      | N/A            |                      |
| TDP-B with MND | Low              | 1-5        | 0               | Absent           | Not met        | Unk      | 0                 | Unk                    | None      | Unk       | N/A            |                      |
| TDP-B          | Not              | 0          | 0               | Absent           | Not met        | Unk      | 0                 | Severe                 | None      | Unk       | N/A            |                      |
| TDP-B with MND | Not              | 0          | 0-2             | Absent           | Unk            | Unk      | 2 microinfarction | Moderate               | None      | Unk       | N/A            | 4                    |
| TDP-B with MND | Intermediate     | 3          | 4               | Absent           | Not applicable | Unk      | 0                 | Unk                    | None      | Limbic    | N/A            |                      |
| TDP-B with MND | Intermediate     | 2-4        | 4               | Moderate         | Intermediate   | Moderate | 0                 | Mild                   | None      | Limbic    | N/A            |                      |
| TDP-B with MND | Low              | 1-5        | 0               | Absent           | Not met        | Unk      | 0                 | Moderate               | None      | Unk       | N/A            |                      |
| TDP-B with     | Low              | 1-5        | 0               | Absent           | Not met        | Unk      | 0                 | Mild                   | None      | Unk       | N/A            | 5                    |

| Pathology             | ADNC level   | Thal phase | Braak NFT stage | CERAD NP density | NIA-Reagan     | CAA      | CVD                   | Arteriosclerosis level | LBD Stage    | AGD stage | Incidental TDP | Incidental diagnoses |
|-----------------------|--------------|------------|-----------------|------------------|----------------|----------|-----------------------|------------------------|--------------|-----------|----------------|----------------------|
| <b>MND</b>            |              |            |                 |                  |                |          |                       |                        |              |           |                |                      |
| <b>TDP-B with MND</b> | Intermediate | 2-5        | 3               | Moderate         | Intermediate   | Unk      | 0                     | Unk                    | None         | Unk       | N/A            |                      |
| <b>TDP-B with MND</b> | Not          | 0          | 0               | Absent           | Not met        | None     | 0                     | Mild                   | None         | None      | N/A            |                      |
| <b>TDP-B with MND</b> | Low          | 1          | 2               | Absent           | Not applicable | None     | 3<br>microinfarctions | Mild                   | None         | Limbic    | N/A            |                      |
| <b>TDP-B</b>          | Not          | 0          | 1               | Absent           | Not applicable | None     | 0                     | 0                      | None         | None      | N/A            |                      |
| <b>TDP-B with MND</b> | Low          | 4-5        | 1               | Moderate         | Not applicable | Mild     | 0                     | 0                      | None         | 0         | N/A            |                      |
| <b>TDP-B with MND</b> | Low          | 2-3        | 2               | Absent           | Not applicable | None     | 0                     | Moderate               | None         | None      | N/A            | 6                    |
| <b>TDP-B with MND</b> | Not          | 0          | 0               | Absent           | Not met        | None     | 0                     | 0                      | None         | Limbic    | N/A            |                      |
| <b>TDP-B</b>          | Low          | 2          | 2               | Moderate         | Not applicable | None     | 0                     | Mild                   | None         | Limbic    | N/A            |                      |
| <b>TDP-B with MND</b> | Not          | 0          | 3               | Absent           | Not applicable | None     | 0                     | 0                      | Transitional | Limbic    | N/A            |                      |
| <b>TDP-B with MND</b> | Low          | 3          | 1               | Frequent         | Not applicable | Moderate | 0                     | Mild                   | Amygdala     | None      | N/A            |                      |
| <b>TDP-B with MND</b> | Low          | 1          | 0               | Absent           | Not met        | Mild     | 0                     | 0                      | Brainstem    | None      | N/A            |                      |
| <b>TDP-B</b>          | Not          | 0          | 4               | Absent           | Not applicable | None     | 0                     | Mild                   | Brainstem    | Diffuse   | N/A            |                      |
| <b>TDP-C</b>          | Low          | 1          | 2               | Absent           | Not applicable | Mild     | 0                     | 0                      | None         | Unk       | N/A            | 7                    |
| <b>TDP-C</b>          | Low          | 1          | 0               | Absent           | Not met        | Unk      | 0                     | Unk                    | None         | Unk       | N/A            | 8                    |
| <b>TDP-C</b>          | Low          | 1          | 2               | Absent           | Not applicable | None     | 0                     | 0                      | None         | None      | N/A            |                      |
| <b>TDP-C</b>          | Low          | 1-5        | 2               | Absent           | Not applicable | None     | 0                     | 0                      | None         | Unk       | N/A            |                      |
| <b>TDP-C</b>          | Not-Low      |            | 0               | Absent           | Not met        | Unk      | 0                     | Unk                    | None         | Unk       | N/A            |                      |
| <b>TDP-C</b>          | Low          | 2-3        | 2               | Frequent         | Not            | None     | 0                     | 0                      | None         | None      | N/A            |                      |

| Pathology      | ADNC level | Thal phase | Braak NFT stage | CERAD NP density | NIA-Reagan     | CAA      | CVD                                        | Arteriosclerosis level | LBD Stage | AGD stage | Incidental TDP | Incidental diagnoses |
|----------------|------------|------------|-----------------|------------------|----------------|----------|--------------------------------------------|------------------------|-----------|-----------|----------------|----------------------|
|                |            |            |                 |                  | applicable     |          |                                            |                        |           |           |                |                      |
| TDP-C          | High       | 4          | 6               | Frequent         | High           | Moderate | 1 territorial infarct                      | Mild                   | None      | None      | N/A            |                      |
| TDP-C          | Not        | 0          | 0               | Absent           | Not met        | None     | 3 microinfarctions                         | Moderate               | None      | None      | N/A            |                      |
| TDP-U with MND | Not-Low    |            | 0               | Absent           | Not met        | None     | 0                                          | Unk                    | None      | Unk       | N/A            |                      |
| TDP-U with MND | Not        | 0          | 0               | Absent           | Not met        | None     | 0                                          | Moderate               | None      | None      | N/A            |                      |
| TDP-U          | Not-Low    | Unk        | 2               | Absent           | Not applicable | Unk      | 0                                          | Unk                    | None      | Unk       | N/A            |                      |
| TDP-U with MND | Low        | 1-5        | 0               | Unk              | Unk            | Unk      | 0                                          | Unk                    | None      | Unk       | N/A            |                      |
| TDP-U with MND | Low        | 2          | 2               | Absent           | Not applicable | Unk      | 1 microinfarction                          | None                   | Unk       | Unk       | N/A            |                      |
| TDP-U          | Low        | 1          | 3               | Absent           | Not applicable | Mild     | 1 microinfarction                          | Mild                   | None      | None      | N/A            |                      |
| TDP-U with MND | Low        | 1          | 1               | Absent           | Not applicable | None     | 0                                          | 0                      | None      | None      | N/A            |                      |
| TDP-U          | Low        | 4          | 1               | Frequent         | Not applicable | Mild     | 1 - lacunar infarct and 2 microinfarctions | Moderate               | None      | Limbic    | N/A            | 9                    |
| TDP-U with MND | Low        | 2-3        | 1               | Sparse           | Low            | None     | 2 - microinfarctions                       | 0                      | None      | Limbic    | N/A            |                      |
| TDP-U with MND | Low        | 1          | 1               | Absent           | Not applicable | None     | 0                                          | 0                      | None      | Limbic    | N/A            | 10                   |
| TDP-U with MND | Low        | 1          | 0               | Absent           | Not met        | Mild     | 0                                          | Mild                   | None      | None      | N/A            | 11                   |
| aFTLD-U        | Not-Low    | Unk        | 1               | Absent           | Not applicable | None     | 0                                          | Unk                    | None      | Unk       | Unk            |                      |
| aFTLD-U        | Not-Low    | Unk        | 1               | Absent           | Not applicable | Unk      | 0                                          | Unk                    | None      | Unk       | Unk            |                      |
| aFTLD-U        | Not        | 0          | 0               | Absent           | Not met        | Unk      | 1 microinfarction                          | Severe                 | Unk       | Unk       | Unk            |                      |

| Pathology | ADNC level        | Thal phase | Braak NFT stage | CERAD NP density | NIA-Reagan     | CAA      | CVD                                  | Arteriosclerosis level | LBD Stage    | AGD stage | Incidental TDP | Incidental diagnoses |
|-----------|-------------------|------------|-----------------|------------------|----------------|----------|--------------------------------------|------------------------|--------------|-----------|----------------|----------------------|
| aFTLD-U   | Not               | 0          | 0               | Absent           | Not met        | None     | 0                                    | Mild                   | None         | Unk       | None           |                      |
| aFTLD-U   | Not-Low           | Unk        | 1               | Absent           | Not applicable | None     | 0                                    | Unk                    | None         | None      | None           |                      |
| aFTLD-U   | Not               | 0          | 1               | Absent           | Not applicable | None     | 0                                    | 0                      | None         | None      | None           |                      |
| aFTLD-U   | Unk               | Unk        | Unk             | Unk              | Unk            | Unk      |                                      | Unk                    | Unk          | Limbic    | Unk            |                      |
| aFTLD-U   | Low               | 1-2        | 0               | Absent           | Not met        | None     | 0                                    | 0                      | None         | None      | None           |                      |
| FTLD-UPS  | Not-Low           | Unk        | 0               | Absent           | Not met        | Unk      | 0                                    | Unk                    | None         | Unk       | None           |                      |
| AD        | Intermediate-High | 2-5        | 5               | Moderate         | Not applicable | None     | 0                                    | Unk                    | None         | Unk       | Unk            | 12                   |
| AD        | Intermediate-High | Unk        | 6               | Frequent         | High           | None     | 0                                    | Unk                    | Amygdala     | Unk       | Unk            |                      |
| AD        | Intermediate-High | 2-5        | 5-6             | Frequent         | High           | None     | 0                                    | Unk                    | None         | Unk       | Unk            | 13                   |
| AD        | Intermediate-High | 2-5        | 5               | Frequent         | High           | Severe   | 0                                    | Unk                    | None         | Limbic    | Limbic - 14    | 15                   |
| AD        | High              | 5          | 6               | Frequent         | High           | Moderate | 0                                    | Moderate               | None         | None      | None           |                      |
| AD        | High              | 4-5        | 6               | Frequent         | High           | None     | 0                                    | Unk                    | None         | Unk       | Unk            |                      |
| AD        | High              | 4-5        | 6               | Frequent         | High           | Mild     | 0                                    | Unk                    | None         | Unk       | Unk            |                      |
| AD        | High              | 4-5        | 6               | Frequent         | High           | Moderate | 0                                    | Unk                    | None         | Unk       | None           |                      |
| AD        | Intermediate-High | 2-5        | 5               | Frequent         | High           | Unk      | 0                                    | Unk                    | Diffuse      | Unk       | Unk            |                      |
| AD        | Intermediate-High | 2-5        | 6               | Frequent         | High           | Moderate | 0                                    | 0                      | None         | None      | None           |                      |
| AD        | Intermediate      | 2-3        | 6               | Frequent         | High           | Moderate | 0                                    | Mild                   | Amygdala     | None      | None           |                      |
| AD        | High              | 5          | 6               | Frequent         | High           | Severe   | 1                                    | Moderate               | Transitional | Limbic    | Limbic - 16    |                      |
| AD        | high              | 5          | 6               | Frequent         | High           | Mild     | 1 lacunar infarct, 1 microinfarction | Mild- Moderate         | Transitional | Limbic    | None           |                      |
| AD        | High              | 5          | 6               | Frequent         | High           | Moderate | 0                                    | Mild                   | None         | None      | None           |                      |
| AD        | High              | 5          | 6               | Frequent         | High           | Severe   | 0                                    | Mild                   | None         | Limbic    | None           |                      |

| Pathology | ADNC level   | Thal phase | Braak NFT stage | CERAD NP density | NIA-Reagan     | CAA  | CVD | Arteriosclerosis level | LBD Stage | AGD stage | Incidental TDP | Incidental diagnoses |
|-----------|--------------|------------|-----------------|------------------|----------------|------|-----|------------------------|-----------|-----------|----------------|----------------------|
| ALS       | Not          | 0          | 1               | Absent           | Not applicable | None | 0   | Mild                   | None      | None      | None           |                      |
| ALS       | Intermediate | 2-5        | 4               | Frequent         | Not applicable | None | 0   | 0                      | None      | None      | None           |                      |
| ALS       | Not          | 0          | 0               | Absent           | Not met        | None | 0   | 0                      | None      | Limbic    | None           |                      |
| ALS       | Low          | 1          | 1               | Absent           | Not applicable | None | 0   | Mild                   | None      | None      | None           |                      |

AD – Alzheimer’s disease, ADNC – Alzheimer’s disease neuropathological change, ALS – amyotrophic lateral sclerosis, aFTLD-U – atypical frontotemporal lobar degeneration with ubiquitin positive inclusions, AGD – argyrophilic grain disease, CAA – cerebral amyloid angiopathy, CBD – corticobasal degeneration, CERAD – Consortium to Establish a Registry for Alzheimer’s disease, CVD – cerebrovascular disease, FTLD-UPS - frontotemporal lobar degeneration with ubiquitin proteasome system positive inclusions, LBD – Lewy body disease, MND – motor neuron disease, PSP – progressive supranuclear palsy, TDP-43 – transactive response DNA binding protein 43 kDA, TDP-U – unclassifiable TDP-43, Unk – unknown

Additional incidental or contributing diagnoses: 1 - capillary hemangioma basis pontis, 2- TDP-A, 3 – FTLD-tau, 4 – chronic traumatic encephalopathy, left frontal and parietal SDH, 5 - subdural hematoma, 6 – non-specific tauopathy in inferior temporal cortex, 7 - Right parafalcine meningioma, fibroblastic type, WHO Grade 1, 8 - PSP, 9 - Tufted astrocytes in limbic regions, 10 - epidural hemorrhage, 11 - Non-specific 4R tauopathy in ITG, 12, - Hippocampal sclerosis, 13 – PSP, 14 - Hippocampal sclerosis, TDP-B, 15 - argyrophilic thorny astrocyte clusters (ATAC), 16 – TDP-U



**Supplementary table 2 – Additional pathologies found in association with each primary pathological diagnosis**

| Primary Pathology       | ADNC Present                 | ADNC Level                  |         |                              |              |                   |        | Braak Stage |     |     |      | CAA      |        |                         |
|-------------------------|------------------------------|-----------------------------|---------|------------------------------|--------------|-------------------|--------|-------------|-----|-----|------|----------|--------|-------------------------|
|                         |                              | Not-Low or Not-Intermediate | Low     | Low-Intermediate or Low-High | Intermediate | Intermediate-High | High   | 1-2         | 3-4 | 5-6 | mild | moderate | severe | Any (# with/# reported) |
| Any, n=117              | 70 (60), not determined on 3 | 22 (19)                     | 43 (37) | 2 (2)                        | 9 (8)        | 6 (5)             | 10 (9) | 40 (6 unk)  | 4   | 17  | 13   | 9        | 4      | 26/86                   |
| FTLD, n=98              | 53 (54), not determined on 3 | 22 (22)                     | 42 (43) | 2 (2)                        | 7 (7)        | 0                 | 2 (2)  | 38 (6 unk)  | 3   | 2   | 11   | 4        | 1      | 16/68                   |
| FTLD-Tau, n=34          | 17 (50), not determined on 2 | 11 (32)                     | 12 (35) | 2 (6)                        | 3 (9)        | 0                 | 0      | 12 (3 unk)  | 3   | 0   | 5    | 0        | 1      | 6/25                    |
| Pick's, n=8             | 2 (25)                       | 4 (50)                      | 2 (25)  | 0                            | 0            | 0                 | 0      | 3           | 0   | 0   | 2    | 0        | 0      | 2/6                     |
| CBD, n=10               | 6 (60)                       | 2 (20)                      | 4 (40)  | 1 (10)                       | 1 (10)       | 0                 | 0      | 4 (1 unk)   | 1   | 0   | 3    | 0        | 0      | 3/8                     |
| PSP, n=9                | 4 (44), not determined on 1  | 4 (44)                      | 1 (11)  | 1 (11)                       | 2 (22)       | 0                 | 0      | 1 (2 unk)   | 2   | 0   | 0    | 0        | 0      | 0/6                     |
| FTDP-17, n=3            | 2 (67)                       | 1 (33)                      | 2 (67)  | 0                            | 0            | 0                 | 0      | 2           | 0   | 0   | 0    | 0        | 0      | 0/2                     |
| AGD, n=1                | 1 (100)                      | 0                           | 1 (100) | 0                            | 0            | 0                 | 0      | 1           | 0   | 0   | 0    | 0        | 0      | 0/1                     |
| Unclassifiable tau, n=3 | 2 (67), not determined on 1  | 0                           | 2 (67)  | 0                            | 0            | 0                 | 0      | 1 (1 unk)   | 0   | 0   | 0    | 0        | 1      | 1/2                     |
| FTLD-TDP, n=55          | 35 (64)                      | 7 (13)                      | 29 (53) | 0                            | 4 (7)        | 0                 | 2 (4)  | 22 (2 unk)  | 11  | 2   | 6    | 4        | 0      | 10/39                   |
| TDP-A, n=9              | 3 (33)                       | 3 (33)                      | 3 (33)  | 0                            | 0            | 0                 | 0      | 3           | 2   | 0   | 0    | 0        | 0      | 0/9                     |
| TDP-B, n=27             | 18 (67)                      | 1 (4)                       | 13 (48) | 0                            | 4 (15)       | 0                 | 1 (4)  | 9 (1 unk)   | 8   | 1   | 2    | 3        | 0      | 5/18                    |
| TDP-C, n=8              | 6 (75)                       | 1 (13)                      | 5 (63)  | 0                            | 0            | 0                 | 1 (13) | 4           | 0   | 1   | 1    | 1        | 0      | 2/6                     |
| TDP-U, n=11             | 8 (73)                       | 2 (18)                      | 8 (73)  | 0                            | 0            | 0                 | 0      | 6           | 1   | 0   | 3    | 0        | 0      | 3/8                     |
| FTLD-FUS (aFTLD-U), n=8 | 1 (13), not determined on 1  | 3 (38)                      | 1 (13)  | 0                            | 0            | 0                 | 0      | 4 (1 unk)   | 0   | 0   | 0    | 0        | 0      | 0/4                     |
| FTLD-UPS, n=1           | 0 (0)                        | 1 (100)                     | 0       | 0                            | 0            | 0                 | 0      | 0           | 0   | 0   | 0    | 0        | 0      | 0/0                     |
| AD, n=15                | 15 (100)                     | 0                           | 0       | 0                            | 1 (7)        | 6 (40)            | 8 (53) | 0           | 0   | 15  | 2    | 5        | 3      | 10/14                   |
| ALS, n=4                | 2 (50)                       | 0                           | 1 (25)  | 0                            | 1 (25)       | 0                 | 0      | 2           | 1   | 0   | 0    | 0        | 0      | 0/4                     |

| Primary Pathology           | CVD (territorial infarct, lacunar infarct, or microinfarct)                                 | LBD (# with/# reported)                                                 | AGD                                | Incidental or contributing TDP          | Other                                                       |
|-----------------------------|---------------------------------------------------------------------------------------------|-------------------------------------------------------------------------|------------------------------------|-----------------------------------------|-------------------------------------------------------------|
| Any, n=117                  | 5 with territorial infarcts, 13 with microinfarction (2 of which also had lacunar infarcts) | 15/110 – 3 amygdala only, 5 brainstem, 5 transitional limbic, 2 diffuse | 25/63 – 22 limbic, 3 diffuse       | 4/35 – 3 limbic, 1 diffuse              |                                                             |
| FTLD, n=98                  | 5 with territorial infarcts, 11 with microinfarction (1 of which also had lacunar infarct), | 10/91 – 1 amygdala only, 5 brainstem, 3 transitional limbic, 1 diffuse  | 20/51 – 17 limbic, 3 diffuse       | 2/25 – 1 limbic, 1 diffuse (TDP-A)      |                                                             |
| FTLD-Tau, n=34              | 3 with territorial infarct, 2 with microinfarct                                             | 4/32 – 2 brainstem, 1 transitional limbic, 1 diffuse                    | 4/13 – all limbic                  | 2/19 – 1 limbic, 1 diffuse (TDP-A)      |                                                             |
| Pick's, n=8                 | 1 with territorial infarct                                                                  | 0/8                                                                     | 0/2                                | 0/3                                     |                                                             |
| CBD, n=10                   | 1 with territorial infarct, 1 with microinfarct                                             | 0/9                                                                     | 2/6 – both limbic                  | 2/7 – 1 limbic, 1 diffuse (TDP-A)       |                                                             |
| PSP, n=9                    | None                                                                                        | 2/8 – 1 brainstem, 1 transitional limbic                                | 1/2 - limbic                       | 0/5                                     |                                                             |
| FTDP-17, n=3                | None                                                                                        | 1/3 - brainstem                                                         | 0/1                                | 0/2                                     |                                                             |
| AGD, n=1                    | 1 with microinfarct                                                                         | 0/1                                                                     | 1/1 – limbic                       | 0/1                                     |                                                             |
| Unclassifiable tau, n=3     | 1 with territorial infarct                                                                  | 1/3 – diffuse                                                           | 0/1                                | 0/1                                     |                                                             |
| FTLD-TDP, n=55              | 2 with territorial infarcts, 8 with microinfarcts (1 of which also had lacunar infarct)     | 6/53 – 1 amygdala only, 3 brainstem, 2 transitional limbic              | 15/34 – 12 limbic, 3 diffuse       | n/a                                     |                                                             |
| TDP-A, n=9                  | 1 with 2 territorial infarcts, 1 with microinfarction                                       | 1/8 – transitional limbic                                               | 3/5 – 2 limbic, 1 diffuse          | n/a                                     |                                                             |
| TDP-B, n=27                 | 2 with microinfarction                                                                      | 5/27 – 1 amygdala only, 3 brainstem, 1 transitional limbic              | 9/18 – 7 limbic, 2 diffuse (TDP-A) | n/a                                     | 2 with contributing tauopathy, 1 with CTE                   |
| TDP-C, n=8                  | 1 with territorial infarct, 1 with microinfarction                                          | 0/8                                                                     | 0/4                                | n/a                                     | 1 with contributing PSP                                     |
| TDP-U, n=11                 | 4 with microinfarction (1 of which also had a lacunar infarct)                              | 0/10                                                                    | 3/7 – all limbic                   | n/a                                     | 1 with non-specific 4R tauopathy in inferior temporal gyrus |
| FTLD-FUS (all aFTLD-U), n=8 | 1 with microinfarction                                                                      | 0/5                                                                     | 1/4 – limbic                       | 0/5                                     |                                                             |
| FTLD-UPS, n=1               | None                                                                                        | 0/1                                                                     | 0/0                                | 0/1                                     |                                                             |
| AD, n=15                    | 2 with microinfarction (1 of which also had lacunar infarct)                                | 5/15 – 2 amygdala, 2 transitional limbic, 1 diffuse                     | 4/8 – all limbic                   | 2/9 – both limbic, one TDP-B, one TDP-U | 1 with ATAC, 1 with contributing PSP                        |
| ALS, n=4                    | None                                                                                        | 0/4                                                                     | 1/4 – limbic                       | n/a                                     |                                                             |

AD – Alzheimer's disease, ADNC – Alzheimer's disease neuropathological change, ALS – amyotrophic lateral sclerosis, aFTLD-U – atypical frontotemporal lobar degeneration with ubiquitin positive inclusions, AGD – argyrophilic grain disease, ATAC – argyrophilic thorny astrocyte clusters, CAA – cerebral amyloid angiopathy, CBD – corticobasal degeneration, CVD – cerebrovascular disease, FTDP-17 – frontotemporal dementia and parkinsonism linked to chromosome 17, FTLD – frontotemporal lobar degeneration, FTLD-UPS – frontotemporal lobar degeneration with ubiquitin proteasome system positive inclusions, LBD – Lewy body disease, PSP – progressive supranuclear palsy, TDP-43 – transactive response DNA binding protein 43 kDa, TDP-U – unclassifiable TDP-43, Unk – unknown

**Supplementary Table 3 – Gene mutations and pathogenic variants identified**

| Gene                             | <i>C9orf72</i>                                                   | <i>MAPT</i> | <i>GRN</i> | <i>TARDBP</i>               | <i>FUS</i> | <i>APP</i> | <i>PSEN1</i> | <i>PSEN2</i> | <i>CHMP2B</i> | Total                                                                                                                                           |
|----------------------------------|------------------------------------------------------------------|-------------|------------|-----------------------------|------------|------------|--------------|--------------|---------------|-------------------------------------------------------------------------------------------------------------------------------------------------|
| # tested                         | 105                                                              | 100         | 100        | 100                         | 100        | 100        | 100          | 100          | 23            |                                                                                                                                                 |
| # mutations                      | 19                                                               | 3           | 3          | 0                           | 0          | 1          | 0            | 0            | 0             | 26                                                                                                                                              |
| # pathogenic variants            | 0                                                                | 0           | 0          | 2                           | 0          | 0          | 0            | 0            | 0             | 2                                                                                                                                               |
| % positive of those tested       | 18.1                                                             | 3.0         | 3.0        | 2.0                         | 0          | 1.0        | 0            | 0            | 0             |                                                                                                                                                 |
| % positive within cohort (n=117) | 16.2                                                             | 2.6         | 2.6        | 1.7                         | 0          | 0.9        | 0            | 0            | 0             | 23.9                                                                                                                                            |
| Associated pathologies           | 8 TDP-B (6 with MND)<br>7 TDP-U (6 with MND)<br>3 TDP-A<br>1 ALS | FTDP-17     | TDP-A      | 1 TDP-B with MND<br>1 TDP-U |            | AD         |              |              |               | 100% of all with FTDP-17<br>73% of all with TDP-U<br>67% of all with TDP-A<br>33% of all with TDP-B<br>25% of all with ALS<br>7% of all with AD |

AD – Alzheimer’s disease, ALS – amyotrophic lateral sclerosis, FTDP-17 – frontotemporal dementia with parkinsonism associated with chromosome 17, MND – motor neuron disease, TDP-U – unclassified transactive response DNA binding protein 43 kDa

Supplementary table 4 – Clinical features by pathological diagnosis

|                                                                                         | Primary diagnosis |                      |              |              | FTLD major molecular class |                           |                             |               | FTLD major molecular class subtypes |                           |                           |                      |          |                       |                           |                           |                           |                           |                                       |
|-----------------------------------------------------------------------------------------|-------------------|----------------------|--------------|--------------|----------------------------|---------------------------|-----------------------------|---------------|-------------------------------------|---------------------------|---------------------------|----------------------|----------|-----------------------|---------------------------|---------------------------|---------------------------|---------------------------|---------------------------------------|
|                                                                                         | All cases, n=117  | FTLD pathology, n=98 | AD, n=15     | ALS, n=4     | FTLD-Tau, n=34             | FTLD-TDP, n=55            | FTLD-FUS, n=8               | FTLD-UPS, n=1 | PiD, n=8                            | CBD, n=10                 | PSP, n=9                  | FTDP-17, n=3         | AGD, n=1 | Unclassified tau, n=3 | TDP-A, n=9 (1 with MND)   | TDP-B, n=27 (21 with MND) | TDP-C, n=8                | TDP-U, n=11 (8 with MND)  | aFTLD-U, n=8                          |
| Male, n (%)                                                                             | 83 (71)           | 69 (70)              | 10 (66.7)    | 4 (100)      | 26 (76.5)                  | 35 (63.6)                 | 7 (87.5)                    | 1 (100)       | 7 (87.5)                            | 6 (60.0)                  | 6 (66.7)                  | 3 (100)              | 1 (100)  | 3 (100)               | 6 (66.7)                  | 18 (66.7)                 | 4 (50)                    | 7 (63.6)                  | 7 (87.5)                              |
| Age of onset – mean (range)                                                             | 55 (18-80)        | 55.0 (18-73)         | 57.3 (34-80) | 55.0 (45-68) | 57.6 <sup>3</sup> (18-73)  | 55.4 <sup>3</sup> (18-73) | 41.1 <sup>1,2</sup> (26-54) | 51            | 58.0 <sup>h</sup> (49-71)           | 60.4 <sup>h</sup> (52-73) | 60.0 <sup>h</sup> (49-68) | 50.3 (50-51)         | 65       | 45.0 (18-68)          | 55.2 (45-64)              | 55.0 <sup>h</sup> (18-73) | 58.5 <sup>h</sup> (44-71) | 54.4 <sup>h</sup> (42-66) | 41.1 <sup>a,b,c,d,e,f,g</sup> (26-54) |
| Age at presentation – mean (range)                                                      | 60 (29-83)        | 60.8 (29-78)         | 62.8 (43-83) | 58.3 (47-73) | 64.4 <sup>3</sup> (53-78)  | 60.1 <sup>3</sup> (44-78) | 45.0 <sup>1,2</sup> (29-55) | 53            | 62.5 <sup>h</sup> (53-73)           | 64.9 <sup>h</sup> (54-78) | 64.9 <sup>h</sup> (58-72) | 59.0 (58-60)         | 73       | 68.3 (57-75)          | 58.9 <sup>h</sup> (48-69) | 61.7 <sup>h</sup> (44-78) | 63.5 <sup>h</sup> (52-75) | 59.2 <sup>h</sup> (50-70) | 45.0 <sup>a,b,c,d,e,f</sup> (29-55)   |
| Age at death – mean (range)                                                             | 64.6 (35-90)      | 64.2 (35-83)         | 68.1 (49-90) | 60.8 (52-74) | 67.8 <sup>3</sup> (57-83)  | 64.5 <sup>3</sup> (47-80) | 48.3 <sup>1,2</sup> (35-57) | 55            | 66.3 <sup>h</sup> (57-74)           | 68.5 <sup>h</sup> (61-83) | 69.1 <sup>h</sup> (63-77) | 60.7 (60-62)         | 77       | 69.3 (58-77)          | 63.1 <sup>h</sup> (49-76) | 64.3 <sup>h</sup> (47-80) | 70.0 <sup>h</sup> (62-76) | 62.0 <sup>h</sup> (53-73) | 48.3 <sup>a,b,c,d,e,f</sup> (35-57)   |
| <b>FTDC diagnostic criteria</b>                                                         |                   |                      |              |              |                            |                           |                             |               |                                     |                           |                           |                      |          |                       |                           |                           |                           |                           |                                       |
| Met at least possible bvFTD criteria                                                    | 78, 86            | 84*, 92*             | 53*, 60*     | 25, 25       | 79, 85                     | 86, 95                    | 88, 100                     | 100, 100      | 100, 100                            | 70, 80                    | 78, 89                    | 100, 100             | 0, 0     | 67, 67                | 89, 89                    | 82, 93                    | 88, 100                   | 91, 100                   | 88, 100                               |
| Met probable bvFTD criteria (n listed if imaging not available to fully apply criteria) | 54, 66            | 64 (n=90), 74 (n=95) | 33, 47       | 0, 0         | 58 (n=31), 64 (n=33)       | 66 (n=50), 79 (n=53)      | 75, 75                      | 100, 100      | 100 (n=7), 100                      | 40, 50                    | 38 (n=8), 44              | 100 (n=2), 100 (n=2) | 0, 0     | 67, 67                | 43 (n=7), 63, (n=8)       | 71 (n=24), 81 (n=26)      | 75, 100                   | 64, 73                    | 75, 75                                |
| Met definite bvFTD criteria                                                             | 21                | 26*                  | 0*           | 0            | 9 <sup>2</sup>             | 40 <sup>1</sup>           | 0                           | 0             | 0 <sup>e</sup>                      | 0 <sup>e</sup>            | 0 <sup>e</sup>            | 100                  | 0        | 0                     | 56                        | 33                        | 0 <sup>e</sup>            | 73 <sup>a,b,c,t,h</sup>   | 0 <sup>e</sup>                        |
| <b>Early Disinhibition</b>                                                              | 77, 85            | 83*, 90*             | 47*, 60*     | 50, 50       | 83, 85                     | 82, 91                    | 88, 100                     | 100, 100      | 75, 75                              | 80, 80                    | 78, 89                    | 100, 100             | 100, 100 | 100, 100              | 78, 89                    | 82, 89                    | 75, 100                   | 91, 91                    | 88, 100                               |
| Inappropriate                                                                           | 52, 63            | 55, 65               | 40, 53       | 25, 50       | 56, 65                     | 51, 62                    | 75, 88                      | 100, 100      | 63, 63                              | 60, 90                    | 44, 44                    | 100, 100             | 0, 0     | 33, 33                | 44, 44                    | 56, 63                    | 63, 88                    | 36, 55                    | 75, 88                                |
| Loss of manners                                                                         | 52, 64            | 58*, 70*             | 27*, 40*     | 0, 0         | 56, 65                     | 56, 71                    | 75, 88                      | 100, 100      | 50, 50                              | 40, 70                    | 67, 67                    | 67, 67               | 100, 100 | 67, 67                | 56, 89                    | 56, 67                    | 38, 63                    | 73, 73                    | 75, 88                                |
| Impulsive                                                                               | 48, 61            | 54*, 68*             | 13*, 20*     | 25, 25       | 50, 65                     | 51, 67                    | 88, 88                      | 100, 100      | 50, 50                              | 40, 50                    | 44, 89                    | 33, 33               | 100, 100 | 100, 100              | 44, 67                    | 59, 78                    | 25, 38                    | 55, 64                    | 88, 88                                |
| <b>Early Apathy</b>                                                                     | 79, 81            | 80, 82               | 67, 73       | 100, 100     | 77, 77                     | 80, 84                    | 88, 88                      | 100, 100      | 88, 88                              | 80, 80                    | 89, 89                    | 67, 67               | 0, 0     | 33, 33                | 89, 89                    | 82, 85                    | 50, 63                    | 91, 91                    | 88, 88                                |
| Apathy                                                                                  | 79, 85            | 80, 86               | 67, 73       | 100, 100     | 77, 77                     | 80, 91                    | 88, 88                      | 100, 100      | 88, 88                              | 80, 80                    | 89, 89                    | 67, 67               | 0, 0     | 33, 33                | 89, 89                    | 82, 96                    | 50, 75                    | 91, 91                    | 88, 88                                |
| Inertia                                                                                 | 17, 24            | 17, 25               | 13, 20       | 25, 25       | 9, 12                      | 22, 29                    | 25, 38                      | 0, 100        | 13, 13                              | 10, 10                    | 11, 11                    | 0, 0                 | 0, 0     | 0, 33                 | 22, 44                    | 26, 33                    | 13, 13                    | 18, 18                    | 25, 38                                |
| <b>Early Loss of sympathy/</b>                                                          | 45, 50            | 48, 54               | 40, 40       | 0, 0         | 44, 47                     | 47, 56                    | 63, 63                      | 100, 100      | 88, 100 <sup>b</sup>                | 20, 20 <sup>d</sup>       | 33, 33                    | 67, 67               | 0, 0     | 33, 33                | 44, 56                    | 41, 52                    | 88, 88                    | 36, 46                    | 63, 63                                |

|                                                        | Primary diagnosis |                      |          |          | FTLD major molecular class |                     |                       |               |                                 | FTLD major molecular class subtypes |                     |              |          |                       |                         |                           |                                 |                          |              |
|--------------------------------------------------------|-------------------|----------------------|----------|----------|----------------------------|---------------------|-----------------------|---------------|---------------------------------|-------------------------------------|---------------------|--------------|----------|-----------------------|-------------------------|---------------------------|---------------------------------|--------------------------|--------------|
|                                                        | All cases, n=117  | FTLD pathology, n=98 | AD, n=15 | ALS, n=4 | FTLD-Tau, n=34             | FTLD-TDP, n=55      | FTLD-FUS, n=8         | FTLD-UPS, n=1 | PiD, n=8                        | CBD, n=10                           | PSP, n=9            | FTDP-17, n=3 | AGD, n=1 | Unclassified tau, n=3 | TDP-A, n=9 (1 with MND) | TDP-B, n=27 (21 with MND) | TDP-C, n=8                      | TDP-U, n=11 (8 with MND) | aFTLD-U, n=8 |
| <b>empathy</b>                                         |                   |                      |          |          |                            |                     |                       |               |                                 |                                     |                     |              |          |                       |                         |                           |                                 |                          |              |
| Lacking empathy                                        | 33, 39            | 35, 40               | 33, 40   | 0, 0     | 32, 35                     | 31, 38              | 63, 65                | 100, 100      | 50, 50                          | 20, 30                              | 33, 33              | 33, 33       | 0, 0     | 33, 33                | 22, 44                  | 22, 30                    | 63, 63                          | 36, 36                   | 63, 63       |
| Lacking warmth                                         | 35, 39            | 40*, 44*             | 13*, 13* | 0, 0     | 34, 35                     | 42, 47              | 63, 63                | 0, 0          | 75, 88 <sup>b,c</sup>           | 10, 10 <sup>a</sup>                 | 11, 11 <sup>a</sup> | 67, 67       | 0, 0     | 33, 33                | 44, 44                  | 33, 41                    | 75, 75                          | 36, 46                   | 63, 44       |
| <b>Early Compulsive behavior</b>                       | 63, 74            | 70*, 80*             | 33*, 53* | 0, 0     | 68, 79                     | 69, 76              | 88, 100               | 100, 100      | 88, 88                          | 60, 70                              | 56, 89              | 100, 100     | 0, 0     | 67, 67                | 78, 78                  | 56, 67                    | 88, 100                         | 82, 82                   | 88, 100      |
| Simple repetitive behavior                             | 26, 37            | 30, 42*              | 7, 13*   | 0, 0     | 21, 35                     | 31, 42              | 50, 63                | 100, 100      | 13, 25                          | 10, 30                              | 33, 44              | 33, 33       | 0, 0     | 33, 67                | 56, 56                  | 15, 26                    | 25, 50                          | 55, 64                   | 50, 41       |
| Complex compulsions                                    | 55, 64            | 60, 69               | 33, 53   | 0, 0     | 62, 77                     | 55, 60              | 88, 88                | 100, 100      | 75, 75                          | 60, 80                              | 44, 78              | 100, 100     | 0, 0     | 67, 67                | 56, 67                  | 48, 52                    | 88, 100                         | 46, 46                   | 88, 88       |
| Stereotypic speech                                     | 16, 24            | 19, 27               | 0, 13    | 0, 0     | 15, 27                     | 18, 22              | 50, 63                | 0, 0          | 13, 38                          | 20, 40                              | 11, 11              | 33, 33       | 0, 0     | 0, 0                  | 22, 22                  | 22, 30                    | 13, 13                          | 9, 9                     | 50, 63       |
| <b>Eating behavior</b>                                 | 63, 80            | 69*, 87*             | 40*, 53* | 0, 25    | 65, 82                     | 71, 89              | 75, 88                | 100, 100      | 88, 100                         | 50, 80                              | 56, 78              | 100, 100     | 0, 0     | 67, 67                | 67, 100                 | 78, 89                    | 63, 88                          | 64, 82                   | 75, 88       |
| Change in food preference                              | 50, 68            | 56*, 74*             | 27*, 47* | 0, 25    | 50, 68                     | 58, 78              | 63, 63                | 100, 100      | 63, 75                          | 20, 70                              | 56, 56              | 100, 100     | 0, 0     | 67, 67                | 67, 100                 | 59, 74                    | 63, 88                          | 46, 64                   | 63, 63       |
| Binge eating                                           | 44, 61            | 48, 65               | 33, 47   | 0, 0     | 53, 74                     | 42, 60              | 63, 63                | 100, 100      | 88, 100                         | 50, 80                              | 33, 56              | 67, 67       | 0, 0     | 33, 67                | 44, 78                  | 41, 52                    | 38, 75                          | 46, 55                   | 63, 63       |
| Oral exploration                                       | 8, 13             | 8, 13                | 7, 13    | 0, 0     | 6, 12 <sup>3</sup>         | 7, 9 <sup>3</sup>   | 25, 50 <sup>1,2</sup> | 0, 0          | 0, 0                            | 0, 10                               | 11, 22              | 33, 33       | 0, 0     | 0, 0                  | 22, 22                  | 7, 7                      | 0, 13                           | 0, 0                     | 25, 50       |
| <b>Neuropsych Pattern</b>                              | 28, 29            | 29, 30               | 20, 20   | 25, 25   | 37, 37                     | 27, 29              | 17, 17                | 0, 0          | 38, 38                          | 40, 40                              | 44, 11              | 0, 0         | 0, 0     | 0, 0                  | 11, 11                  | 32, 36                    | 14, 14                          | 36, 36                   | 17, 17       |
| Executive impairment                                   | 86, 89            | 85, 89               | 100, 100 | 50, 50   | 93, 97                     | 80, 84              | 86, 86                | 100, 100      | 88, 100                         | 100, 100                            | 100, 100            | 100, 100     | 0, 0     | 100, 100              | 89, 100                 | 82, 86                    | 71, 71                          | 73, 73                   | 86, 86       |
| Memory preserved                                       | 41, 41            | 44, 44               | 20, 20   | 50, 50   | 53, 53                     | 41, 41              | 29, 29                | 0, 0          | 50, 50                          | 50, 50                              | 67, 67              | 0, 0         | 100, 100 | 0, 0                  | 11, 11                  | 41, 41                    | 29, 29                          | 73, 73                   | 29, 29       |
| Visuospatial Preserved                                 | 73, 74            | 75, 76               | 53, 53   | 100, 100 | 73, 73                     | 74, 76              | 83, 83                | 100, 100      | 88, 88                          | 70, 70                              | 56, 56              | 100, 100     | 100, 100 | 100, 100              | 78, 78                  | 70, 74                    | 86, 86                          | 73, 73                   | 83, 83       |
| <b>Other cognitive, behavioral, and motor symptoms</b> |                   |                      |          |          |                            |                     |                       |               |                                 |                                     |                     |              |          |                       |                         |                           |                                 |                          |              |
| Memory                                                 | 40, 49            | 37, 46               | 60, 67   | 50, 50   | 41, 53                     | 36, 46              | 13, 45                | 100, 100      | 25, 38                          | 70, 90                              | 22, 33              | 67, 67       | 0, 0     | 33, 33                | 56, 56                  | 41, 44                    | 13, 38                          | 27, 46                   | 13, 13       |
| Language                                               | 39, 51            | 36, 47*              | 53, 80*  | 25, 50   | 24, 35                     | 44, 55              | 38, 38                | 100, 100      | 13, 13 <sup>f</sup>             | 30, 50                              | 22, 33              | 33, 33       | 0, 0     | 33, 67                | 44, 56                  | 41, 56                    | 88, 100 <sup>a,g</sup>          | 18, 18 <sup>f</sup>      | 38, 38       |
| Executive (plan, organize, multitask, problem-solve)   | 72, 77            | 69, 76               | 87, 87   | 75, 75   | 65, 71                     | 71, 78              | 75, 75                | 100, 100      | 88, 88                          | 60, 80                              | 67, 67              | 67, 67       | 0, 0     | 33, 33                | 100, 100                | 63, 74                    | 38, 50                          | 91, 91                   | 75, 75       |
| Gets lost                                              | 9, 12             | 10, 12               | 7, 7     | 0, 25    | 12, 15                     | 9, 11               | 0, 0                  | 100, 100      | 13, 13                          | 20, 30                              | 0, 0                | 33, 33       | 0, 0     | 0, 0                  | 22, 22                  | 11, 11                    | 0, 0                            | 0, 9                     | 0, 0         |
| Visual misperception                                   | 4, 6              | 3, 5                 | 13, 13   | 0, 0     | 9, 12 <sup>2</sup>         | 0, 0 <sup>1,3</sup> | 0, 13 <sup>2</sup>    | 0, 0          | 13, 13                          | 10, 20                              | 11, 11              | 0, 0         | 0, 0     | 0, 0                  | 0, 0                    | 0, 0                      | 0, 0                            | 0, 0                     | 0, 13        |
| Prosopagnosia                                          | 10, 14            | 10, 14               | 7, 7     | 25, 25   | 12, 12                     | 9, 16               | 13, 13                | 0, 0          | 0, 0                            | 30, 30                              | 0, 0                | 0, 0         | 0, 0     | 33, 33                | 0, 0                    | 7, 11                     | 38, 63                          | 0, 9                     | 13, 13       |
| Falls                                                  | 24, 34            | 25*, 37*             | 0*, 7*   | 75, 75   | 29, 38                     | 24, 38              | 13, 13                | 100, 100      | 0 <sup>c</sup> , 0 <sup>c</sup> | 30, 50                              | 78 <sup>a,f</sup>   | 0, 0         | 0, 0     | 0, 33                 | 22, 22                  | 30, 52                    | 0 <sup>c</sup> , 0 <sup>c</sup> | 27, 46                   | 13, 13       |

|                                             | Primary diagnosis |                      |          |          | FTLD major molecular class        |                                     |                   |               |                     | FTLD major molecular class subtypes |                                 |                   |          |                       |                                         |                           |                                   |                          |                                 |                     |
|---------------------------------------------|-------------------|----------------------|----------|----------|-----------------------------------|-------------------------------------|-------------------|---------------|---------------------|-------------------------------------|---------------------------------|-------------------|----------|-----------------------|-----------------------------------------|---------------------------|-----------------------------------|--------------------------|---------------------------------|---------------------|
|                                             | All cases, n=117  | FTLD pathology, n=98 | AD, n=15 | ALS, n=4 | FTLD-Tau, n=34                    | FTLD-TDP, n=55                      | FTLD-FUS, n=8     | FTLD-UPS, n=1 | PiD, n=8            | CBD, n=10                           | PSP, n=9                        | FTDP-17, n=3      | AGD, n=1 | Unclassified tau, n=3 | TDP-A, n=9 (1 with MND)                 | TDP-B, n=27 (21 with MND) | TDP-C, n=8                        | TDP-U, n=11 (8 with MND) | aFTLD-U, n=8                    |                     |
| Dysphagia                                   | 29, 44            | 32*, 49*             | 7*, 13*  | 50, 50   | 27, 47                            | 36, 53                              | 25, 25            | 0, 100        | 13, 13 <sup>c</sup> | 20, 30 <sup>c</sup>                 | 44, 100 <sup>a,b,i,h</sup>      | 78 <sup>a,i</sup> | 33, 33   | 0, 0                  | 33, 67                                  | 22, 67                    | 48, 63 <sup>f</sup>               | 0, 0 <sup>c,e</sup>      | 46, 55                          | 25, 25 <sup>c</sup> |
| Depression                                  | 29, 30            | 27, 28               | 33, 33   | 75, 75   | 24, 27                            | 29, 29                              | 25, 25            | 0, 0          | 25, 25              | 40, 50                              | 22, 22                          | 0, 0              | 0, 0     | 0, 0                  | 33, 33                                  | 30, 30                    | 38, 38                            | 18, 18                   | 25, 25                          |                     |
| Anxiety                                     | 31, 35            | 31, 34               | 27, 40   | 50, 50   | 27, 27                            | 35, 40                              | 13, 13            | 100, 100      | 38, 38              | 40, 40                              | 11, 11                          | 33, 33            | 0, 0     | 0, 0                  | 33, 33                                  | 37, 44                    | 25, 38                            | 36, 36                   | 13, 13                          |                     |
| Delusions                                   | 26, 35            | 29, 36               | 13, 40   | 0, 0     | 15 <sup>z</sup> , 21 <sup>z</sup> | 40 <sup>1</sup> , 49 <sup>1,3</sup> | 0, 0 <sup>2</sup> | 100, 100      | 25, 25              | 0 <sup>d</sup> , 20                 | 0 <sup>d</sup> , 0 <sup>d</sup> | 33, 33            | 0, 0     | 67, 67                | 78 <sup>b,c,h</sup> , 89 <sup>c,h</sup> | 41, 48                    | 13, 25                            | 27, 36                   | 0 <sup>d</sup> , 0 <sup>d</sup> |                     |
| Hallucinations                              | 11, 18            | 13, 19               | 0, 13    | 0, 0     | 15, 21                            | 15, 22                              | 0, 0              | 0, 0          | 0, 0                | 20, 40                              | 0, 0                            | 33, 33            | 100, 100 | 33, 33                | 11, 11                                  | 22, 33                    | 0, 0                              | 9, 18                    | 0, 0                            |                     |
| Mental rigidity                             | 41, 53            | 47*, 58*             | 0*, 20*  | 50, 50   | 44, 47                            | 47, 66                              | 50, 50            | 100, 100      | 50, 50              | 40, 50                              | 33, 33                          | 100, 100          | 0, 0     | 33, 33                | 44, 56                                  | 56, 74                    | 38, 75                            | 36, 46                   | 50, 50                          |                     |
| Aggression                                  | 25, 35            | 30*, 39              | 0*, 20   | 0, 0     | 32, 44                            | 26, 33                              | 38, 50            | 100, 100      | 50, 50              | 20, 50                              | 33, 44                          | 33, 33            | 0, 0     | 33, 33                | 11, 33                                  | 30, 33                    | 25, 25                            | 27, 36                   | 38, 50                          |                     |
| Pseudobulbar affect                         | 8, 13             | 7, 13                | 0, 0     | 50, 50   | 0, 6                              | 13, 20                              | 0, 0              | 0, 0          | 0, 0                | 0, 10                               | 0, 11                           | 0, 0              | 0, 0     | 0, 0                  | 0, 0                                    | 22, 33                    | 0, 0                              | 9, 18                    | 0, 0                            |                     |
| Hyperreligiosity                            | 7, 9              | 8, 10                | 0, 0     | 0, 0     | 9, 9                              | 7, 9                                | 13, 13            | 0, 100        | 0, 0                | 10, 10                              | 11, 11                          | 33, 33            | 0, 0     | 0, 0                  | 0, 0                                    | 7, 7                      | 13, 25                            | 9, 9                     | 13, 13                          |                     |
| Criminal behavior                           | 17, 24            | 18, 26               | 13, 20   | 0, 0     | 24, 27                            | 15, 26                              | 25, 25            | 0, 0          | 13, 25              | 10, 10                              | 33, 33                          | 67, 67            | 0, 0     | 33, 33                | 11, 33                                  | 7, 15                     | 25, 50                            | 27, 27                   | 25, 25                          |                     |
| Hypersexual                                 | 14, 15            | 14, 15               | 13, 13   | 0, 0     | 12, 12                            | 16, 16                              | 13, 25            | 0, 0          | 13, 13              | 20, 20                              | 0, 0                            | 0, 0              | 0, 0     | 33, 33                | 22, 22                                  | 19, 19                    | 0, 0                              | 18, 18                   | 13, 25                          |                     |
| Hyposexual                                  | 9, 9              | 8, 8                 | 13, 13   | 0, 0     | 3, 3                              | 9, 9                                | 13, 13            | 100, 100      | 13, 13              | 0, 0                                | 0, 0                            | 0, 0              | 0, 0     | 0, 0                  | 0, 0                                    | 0, 0 <sup>f</sup>         | 50 <sup>e</sup> , 50 <sup>e</sup> | 9, 9                     | 13, 13                          |                     |
| Increased drug/etoh use                     | 18, 20            | 20, 22               | 7, 7     | 0, 0     | 15, 15                            | 22, 26                              | 38, 38            | 0, 0          | 38, 38              | 0, 0                                | 0, 0                            | 67, 67            | 0, 0     | 0, 0                  | 44, 44                                  | 19, 22                    | 13, 25                            | 18, 18                   | 38, 38                          |                     |
| Lacking insight                             | 84, 87            | 89*, 90              | 67*, 87  | 25, 25   | 82, 82                            | 91, 93                              | 100, 100          | 100, 100      | 88, 88              | 80, 80                              | 89, 89                          | 100, 100          | 0, 0     | 67, 67                | 100, 100                                | 85, 89                    | 88, 88                            | 100, 100                 | 100, 100                        |                     |
| <b>Neurological examination features</b>    |                   |                      |          |          |                                   |                                     |                   |               |                     |                                     |                                 |                   |          |                       |                                         |                           |                                   |                          |                                 |                     |
| Dysarthria                                  | 21, 33            | 20, 35*              | 0, 7*    | 100, 100 | 15, 27                            | 26, 42                              | 13, 13            | 0, 100        | 13, 13              | 0, 0                                | 33, 67                          | 0, 0              | 0, 0     | 33, 67                | 0, 44                                   | 33, 44                    | 13, 13                            | 36, 55                   | 13, 13                          |                     |
| Saccadic eye movement – delayed initiation  | 17, 30            | 17, 31               | 13, 27   | 25, 25   | 24, 35                            | 13, 24                              | 25, 50            | 0, 100        | 0, 0                | 40, 40                              | 11, 56                          | 67, 67            | 0, 0     | 33, 33                | 11, 11                                  | 22, 41                    | 0, 0                              | 0, 9                     | 25, 50                          |                     |
| Saccadic eye movement - slowed velocity     | 15, 24            | 16, 27               | 0, 7     | 25, 25   | 21, 35                            | 13, 20                              | 17, 25            | 0, 100        | 0, 0                | 0, 30                               | 33, 44                          | 67, 67            | 0, 100   | 67, 67                | 11, 22                                  | 22, 30                    | 0, 0                              | 0, 9                     | 25, 25                          |                     |
| Saccadic eye movement – decreased amplitude | 12, 23            | 12, 25               | 7, 13    | 25, 25   | 18, 35                            | 9, 18                               | 13, 13            | 0, 100        | 0, 0 <sup>c</sup>   | 0, 30                               | 56, 78 <sup>a,d,f</sup>         | 33, 33            | 0, 100   | 0, 0                  | 0, 0 <sup>c</sup>                       | 15, 26                    | 0, 0 <sup>c</sup>                 | 9, 27                    | 13, 13                          |                     |
| Rigidity – appendicular                     | 39, 57            | 38, 57               | 47, 67   | 25, 25   | 47, 71                            | 33, 49                              | 25, 57            | 100, 100      | 25, 38              | 40, 80                              | 67, 89                          | 67, 67            | 0, 100   | 67, 67                | 56, 89                                  | 33, 44                    | 0, 25                             | 36, 46                   | 25, 50                          |                     |
| Rigidity – axial                            | 19, 34            | 20, 35               | 7, 33    | 25, 25   | 29, 47                            | 15, 27                              | 25, 25            | 0, 0          | 0, 0 <sup>c</sup>   | 20, 40                              | 33, 33                          | 67, 67            | 100, 100 | 67, 67                | 11, 44                                  | 19, 26                    | 0, 13                             | 18, 27                   | 25, 25                          |                     |

|                                                                  | Primary diagnosis |                      |                 |                | FTLD major molecular class      |                                     |                               |               | FTLD major molecular class subtypes |                   |                             |              |          |                       |                         |                           |                         |                                       |                                   |
|------------------------------------------------------------------|-------------------|----------------------|-----------------|----------------|---------------------------------|-------------------------------------|-------------------------------|---------------|-------------------------------------|-------------------|-----------------------------|--------------|----------|-----------------------|-------------------------|---------------------------|-------------------------|---------------------------------------|-----------------------------------|
|                                                                  | All cases, n=117  | FTLD pathology, n=98 | AD, n=15        | ALS, n=4       | FTLD-Tau, n=34                  | FTLD-TDP, n=55                      | FTLD-FUS, n=8                 | FTLD-UPS, n=1 | PiD, n=8                            | CBD, n=10         | PSP, n=9                    | FTDP-17, n=3 | AGD, n=1 | Unclassified tau, n=3 | TDP-A, n=9 (1 with MND) | TDP-B, n=27 (21 with MND) | TDP-C, n=8              | TDP-U, n=11 (8 with MND)              | aFTLD-U, n=8                      |
|                                                                  |                   |                      |                 |                |                                 |                                     |                               | 100           |                                     |                   | 78 <sup>a</sup>             |              | 100      |                       |                         |                           |                         |                                       |                                   |
| Tremor – rest                                                    | 4, 10             | 5, 11                | 0, 7            | 0, 0           | 6, 12                           | 6, 11                               | 0, 0                          | 0, 100        | 0, 0                                | 10, 20            | 11, 11                      | 0, 0         | 0, 100   | 0, 0                  | 11, 22                  | 7, 15                     | 0, 0                    | 0, 0                                  | 0, 0                              |
| Tremor – action/postural                                         | 29, 46            | 29, 45               | 20, 47          | 75, 75         | 32, 50                          | 24, 42                              | 50, 50                        | 0, 0          | 25, 38                              | 30, 60            | 22, 44                      | 67, 67       | 0, 0     | 67, 67                | 11, 33                  | 30, 48                    | 25, 38                  | 18, 36                                | 50, 50                            |
| Myoclonus                                                        | 3, 5              | 2, 3*                | 7, 20*          | 0, 0           | 0, 0                            | 2, 4                                | 13, 13                        | 0, 0          | 0, 0                                | 0, 0              | 0, 0                        | 0, 0         | 0, 0     | 0, 11                 | 4, 4                    | 0, 0                      | 0, 0                    | 13, 13                                |                                   |
| Dystonia                                                         | 3, 12             | 3, 13                | 7, 7            | 0, 0           | 3, 21                           | 2, 7                                | 13, 25                        | 0, 0          | 0, 0                                | 0, 40             | 0, 22                       | 0, 0         | 100, 100 | 0, 11                 | 0, 7                    | 0, 0                      | 9, 9                    | 13, 25                                |                                   |
| Bradykinesia                                                     | 35, 56            | 36, 55               | 13, 47          | 100, 100       | 35, 56                          | 35, 55                              | 50, 50                        | 0, 100        | 0, 0 <sup>c,e</sup>                 | 50, 70            | 67, 89 <sup>a</sup>         | 33, 67       | 0, 100   | 0, 33                 | 33, 56                  | 37, 63 <sup>a</sup>       | 13, 25                  | 46, 55                                | 50, 50                            |
| Apraxia                                                          | 13, 28            | 10, 25               | 20, 47          | 50, 50         | 12, 27                          | 11, 24                              | 0, 13                         | 0, 100        | 0, 13                               | 40, 50            | 0, 33                       | 0, 0         | 0, 0     | 0, 0                  | 0, 22                   | 15, 26                    | 0, 13                   | 18, 27                                | 0, 13                             |
| Ataxia                                                           | 9, 13             | 7, 11                | 13, 13          | 50, 50         | 12, 18                          | 4, 7                                | 13, 13                        | 0, 0          | 0, 0                                | 20, 20            | 22, 44                      | 0, 0         | 0, 0     | 0, 0                  | 11, 33                  | 4, 4                      | 0, 0                    | 0, 0                                  | 13, 13                            |
| Decreased muscle power                                           | 24, 30            | 26*, 32*             | 0*, 0*          | 75, 100        | 9 <sup>2</sup> , 9 <sup>2</sup> | 38 <sup>1</sup> , 49 <sup>1,3</sup> | 0, 0 <sup>2</sup>             | 100, 100      | 13, 13                              | 10, 10            | 0, 0 <sup>e</sup>           | 0, 0         | 0, 0     | 33, 33                | 22, 33                  | 48, 63 <sup>c,f,h</sup>   | 0, 0 <sup>e</sup>       | 55, 64                                | 0, 0 <sup>e</sup>                 |
| Decreased muscle bulk                                            | 23, 31            | 24, 31               | 7, 20           | 75, 75         | 12, 12 <sup>2</sup>             | 33, 46 <sup>1</sup>                 | 13, 13                        | 0, 0          | 13, 13                              | 10, 10            | 11, 11                      | 33, 33       | 0, 0     | 0, 0                  | 11, 22                  | 44, 63 <sup>f</sup>       | 0, 0 <sup>e</sup>       | 46, 55                                | 13, 13                            |
| Fasciculations                                                   | 21, 32            | 22*, 32              | 0*, 13          | 75, 100        | 3 <sup>2</sup> , 3 <sup>2</sup> | 36 <sup>1</sup> , 53 <sup>1,3</sup> | 0, 0 <sup>2</sup>             | 100, 100      | 0, 0 <sup>e</sup>                   | 0, 0 <sup>e</sup> | 0, 0 <sup>e</sup>           | 33, 33       | 0, 0     | 0, 0                  | 11, 22                  | 48, 70 <sup>a,b,c,h</sup> | 13, 13                  | 46, 64                                | 0, 0 <sup>e</sup>                 |
| Babinski                                                         | 17, 28            | 18, 31               | 0, 7            | 50, 50         | 15, 27                          | 22, 36                              | 13, 13                        | 0, 0          | 13, 13                              | 10, 30            | 22, 44                      | 33, 33       | 0, 0     | 0, 0                  | 11, 44                  | 22, 37                    | 0, 0                    | 46, 55                                | 13, 13                            |
| Brisk reflexes                                                   | 34, 46            | 34, 47               | 20, 27          | 100, 100       | 27, 38                          | 44, 60 <sup>3</sup>                 | 0, 0 <sup>2</sup>             | 0, 0          | 0 <sup>2</sup> , 0 <sup>e,g</sup>   | 40, 50            | 22, 44                      | 100, 100     | 0, 0     | 0, 33                 | 33, 67                  | 44, 63 <sup>a,h</sup>     | 13, 13                  | 73 <sup>a,h</sup> , 82 <sup>a,h</sup> | 0 <sup>e</sup> , 0 <sup>e,g</sup> |
| Spasticity                                                       | 9, 14             | 8, 12                | 0, 7            | 75, 75         | 6, 6                            | 11, 16                              | 0, 0                          | 0, 100        | 0, 0                                | 0, 0              | 22, 22                      | 0, 0         | 0, 0     | 11, 11                | 7, 11                   | 0, 0                      | 27, 46                  | 0, 0                                  |                                   |
| Abnormal gait                                                    | 22, 33            | 22, 35               | 7, 13           | 75, 75         | 27, 41                          | 24, 36                              | 0, 0                          | 0, 0          | 13, 13                              | 40, 50            | 22, 67                      | 0, 0         | 0, 0     | 67, 67                | 11, 33                  | 30, 41                    | 13, 13                  | 27, 46                                | 0, 0                              |
| Retropulsion                                                     | 10, 19            | 10, 19               | 0, 7            | 50, 50         | 15, 29                          | 7, 13                               | 13, 13                        | 0, 100        | 0, 0                                | 20, 40            | 33, 56                      | 0, 0         | 0, 33    | 0, 0                  | 11, 19                  | 0, 0                      | 9, 18                   | 13, 13                                |                                   |
| <b>NPI Frequency x severity scores (max of 12), mean (SD), n</b> |                   |                      |                 |                |                                 |                                     |                               |               |                                     |                   |                             |              |          |                       |                         |                           |                         |                                       |                                   |
| Delusions                                                        | 1.1 (2.8), n=91   | 1.0 (2.6), n=78      | 2.3 (4.5), n=9  | 0 (0), n=4     | 0.1 (.4), n=24                  | 1.6 (3.1), n=46                     | 0 (0), n=7                    | 6             | 0 (0), n=6                          | 0.3 (0.7), n=8    | 0 (0), n=7                  | 0            | 0        | 0                     | 2.1 (2.9), n=8          | 1.8 (3.6), n=23           | 0.2 (0.4), n=5          | 1.2 (2.8), n=11                       | 0 (0), n=7                        |
| Hallucinations                                                   | 0.3 (1.2), n=90   | 0.3 (1.2), n=77      | 0.4 (1.3), n=9  | 0 (0), n=4     | 0.5 (1.8), n=24                 | 0.2 (0.7), n=46                     | 0 (0), n=6                    | 0             | 1.5 (3.7), n=6                      | 0.1 (0.4), n=8    | 0 (0), n=7                  | 0            | 1        | 0                     | 0.8 (1.5), n=8          | 0.2 (0.5), n=23           | 0 (0), n=5              | 0.1 (0.3), n=11                       | 0 (0), n=6                        |
| Agitation                                                        | 2.5 (3.4), n=90   | 2.6 (3.4), n=77      | 1.9 (3.9), n=9  | 1.0 (1.2), n=4 | 2.2 (3.2), n=24                 | 2.5 (3.4), n=45                     | 4.6 (4.1), n=7                | 6             | 3.8 (4.6), n=6                      | 1.9 (2.3), n=8    | 1.0 (1.7), n=7              | 0            | 0        | 8                     | 1.1 (2.2), n=8          | 2.4 (3.5), n=23           | 4.8 (3.0), n=5          | 2.7 (3.8), n=10                       | 4.6 (4.1), n=7                    |
| Depression                                                       | 1.2 (2.4), n=90   | 1.0* (2.2), n=78     | 3.4* (3.6), n=8 | 1.3 (1.9), n=4 | 1.3 (2.6), n=23                 | 0.9 (2.1), n=47                     | 0.7 (1.5), n=7                | 0             | 0.7 (1.6), n=6                      | 0.6 (1.0), n=7    | 3.1 (4.0), n=7              | 0            | 0        | 0                     | 2.3 (3.6), n=8          | 0.2 (0.6), n=24           | 0.6 (1.3), n=5          | 1.7 (2.6), n=11                       | 0.7 (1.5), n=7                    |
| Anxiety                                                          | 1.7 (2.8), n=91   | 1.6 (2.8), n=78      | 2.1 (2.8), n=8  | 1.3 (1.9), n=4 | 0.8 <sup>3</sup> (1.3), n=24    | 1.5 <sup>3</sup> (2.8), n=46        | 5.1 <sup>1,2</sup> (4.3), n=7 | 0             | 0.8 (1.6), n=6                      | 1.4 (1.7), n=8    | 0.3 <sup>h</sup> (0.5), n=7 | 0            | 0        | 0                     | 2.8 (3.4), n=8          | 1.6 (2.7), n=23           | 0 <sup>h</sup> (0), n=5 | 1.3 (3.0), n=11                       | 5.1 <sup>cf</sup> (4.3), n=7      |

|                 | Primary diagnosis |                      |                 |                | FTLD major molecular class   |                              |                               |               | FTLD major molecular class subtypes |                             |                             |              |          |                       |                             |                              |                             |                              |                                     |
|-----------------|-------------------|----------------------|-----------------|----------------|------------------------------|------------------------------|-------------------------------|---------------|-------------------------------------|-----------------------------|-----------------------------|--------------|----------|-----------------------|-----------------------------|------------------------------|-----------------------------|------------------------------|-------------------------------------|
|                 | All cases, n=117  | FTLD pathology, n=98 | AD, n=15        | ALS, n=4       | FTLD-Tau, n=34               | FTLD-TDP, n=55               | FTLD-FUS, n=8                 | FTLD-UPS, n=1 | PiD, n=8                            | CBD, n=10                   | PSP, n=9                    | FTDP-17, n=3 | AGD, n=1 | Unclassified tau, n=3 | TDP-A, n=9 (1 with MND)     | TDP-B, n=27 (21 with MND)    | TDP-C, n=8                  | TDP-U, n=11 (8 with MND)     | aFTLD-U, n=8                        |
|                 | n=90              |                      |                 | n=4            | n=24                         | n=46                         | n=7                           |               | n=6                                 | n=8                         | n=7                         |              |          |                       |                             |                              |                             |                              |                                     |
| Euphoria        | 1.5 (2.4), n=91   | 1.6 (2.6), n=78      | 0.4 (1.3), n=9  | 1.0 (2.0), n=4 | 1.0 <sup>3</sup> (1.9), n=23 | 1.5 <sup>3</sup> (2.1), n=47 | 4.6 <sup>1,2</sup> (4.9), n=7 | 0             | 1.2 (1.6), n=5                      | 1.2 (0.4), n=8              | 0 <sup>h</sup> (0), n=7     | 0            | 1        | 8                     | 1.5 (1.9), n=8              | 1.9 (2.5), n=24              | 1 (1.7), n=5                | 0.8 <sup>h</sup> (1.2), n=11 | 4.6 <sup>c,e</sup> (4.9), n=7       |
| Apathy          | 6.8 (4.0), n=88   | 7.3* (3.9), n=75     | 3.9* (4.0), n=9 | 4.0 (3.7), n=4 | 7.1 <sup>3</sup> (3.9), n=22 | 6.7 <sup>3</sup> (3.6), n=45 | 12.0 <sup>1,2</sup> (0), n=7  | 0             | 8.5 (3.3), n=6                      | 4.5 <sup>h</sup> (4.2), n=6 | 8.4 (4.1), n=7              | 8            | 4        | 8                     | 6.1 <sup>h</sup> (3.7), n=8 | 7.5 (3.1), n=23              | 2.8 <sup>h</sup> (3.9), n=5 | 7.6 (3.6), n=10              | 12.0 <sup>b,d,f</sup> (0), n=7      |
| Disinhibition   | 4.3 (4.0), n=86   | 4.6 (4.0), n=74      | 2.3 (2.9), n=8  | 2.5 (3.8), n=4 | 4.2 <sup>3</sup> (4.0), n=21 | 4.0 <sup>3</sup> (3.5), n=45 | 10 <sup>1,2</sup> (3.8), n=7  | 4             | 4.7 (4.5), n=6                      | 4.3 (4.2), n=6              | 2.2 <sup>h</sup> (2.6), n=6 | 4            | 6        | 12                    | 4.0 (3.1), n=8              | 3.7 <sup>h</sup> (3.6), n=24 | 3.8 (3.1), n=4              | 4.8 (4.1), n=10              | 10.0 <sup>c,e</sup> (3.8), n=7      |
| Irritability    | 2.1 (3.1), n=89   | 1.8 (2.7), n=76      | 4.0 (5.2), n=9  | 3.5 (4.1), n=4 | 1.6 (2.3), n=23              | 1.7 (2.7), n=45              | 2.9 (4.5), n=7                | 4             | 2.2 (2.6), n=6                      | 2.0 (2.6), n=7              | 0.9 (2.3), n=7              | 0            | 2        | 2                     | 0.5 (1.4), n=8              | 1.8 (2.7), n=23              | 2.8 (3.9), n=5              | 1.8 (2.6), n=10              | 2.9 (4.5), n=7                      |
| Aberrant Motor  | 4.8 (4.6), n=85   | 5.3 (4.6), n=72      | 2.2 (3.9), n=9  | 2.0 (4.0), n=4 | 3.5 <sup>3</sup> (4.1), n=19 | 5.3 (4.4), n=45              | 9.1 <sup>1</sup> (5.0), n=7   | 12            | 5.6 (4.8), n=5                      | 0.8 <sup>h</sup> (1.8), n=5 | 4.0 (4.6), n=6              | 0            | 2        | 8                     | 1.8 <sup>h</sup> (2.9), n=8 | 5.7 (4.7), n=23              | 6.4 (4.8), n=5              | 6.7 (3.6), n=10              | 9.1 <sup>b,d</sup> (5.0), n=7       |
| Sleep           | 2.7 (3.4), n=87   | 2.8 (3.5), n=74      | 1.0 (1.7), n=9  | 3.5 (3.3), n=4 | 1.8 <sup>3</sup> (2.7), n=22 | 2.5 <sup>3</sup> (3.2), n=44 | 8.0 <sup>1,2</sup> (3.8), n=7 | 4             | 2.0 <sup>h</sup> (2.5), n=6         | 2.7 (3.0), n=6              | 0.6 <sup>h</sup> (1.5), n=7 | 0            | 0        | 8                     | 2.5 <sup>h</sup> (4.2), n=8 | 2.5 <sup>h</sup> (3.1), n=23 | 1.8 (1.7), n=4              | 2.8 <sup>h</sup> (3.2), n=10 | 8.0 <sup>a,c,d,e,g</sup> (3.8), n=7 |
| Eating behavior | 5.3 (4.3), n=85   | 5.8 (4.2), n=72      | 2.4 (3.7), n=9  | 1.3 (1.9), n=4 | 6.1 (4.1), n=21              | 5.1 <sup>3</sup> (4.2), n=44 | 10.0 <sup>2</sup> (3.3), n=6  | 6             | 7.7 (3.9), n=6                      | 5.7 (4.4), n=6              | 6.0 (4.4), n=6              | 8            | 0        | 4                     | 5.1 (4.6), n=7              | 6.0 (4.5), n=23              | 3.2 (4.4), n=5              | 4.1 (3.0), n=10              | 10.0 (3.3), n=6                     |

Statistical analyses were conducted on groups with N≥4 for ANOVAs and N≥5 for Chi Square.

Unless otherwise specified, results are formatted as % with feature at first evaluation, % with feature at any point in disease course. Highlighting indicates a significant difference (p<.05) existed in ANOVA (continuous variables) or chi square (categorical variables) among the highlighted groups. Yellow indicates the significant difference existed at the time of first evaluation. Blue indicates the significant difference is present at any point in the disease course. Green indicates that the significant difference was present both at first evaluation and throughout disease course.

Comparison of primary diagnoses: Chi square or Fisher's exact test if expected cell count <5 for categorical variables, ANOVA with Bonferroni post-hoc, p<.05

\*=significant difference between FTLD and AD

Comparison of FTLD major molecular classes: Chi square for categorical variables, ANOVA with Bonferroni post-hoc, p<.05

1=significantly different from FTLD-Tau

2=significantly different from FTLD-TDP

3=significantly different from FTLD-FUS

Comparison of FTLD major molecular class subtypes: Chi square for categorical variables, ANOVA with Bonferroni post-hoc, p<.05

a=significantly different from Pick's

b=significantly different from CBD

c=significantly different from PSP

d=significantly different from TDP-A

e=significantly different from TDP-B

f=significantly different from TDP-C

g=significantly different from TDP-U

h=significantly different from aFTLD-U



AD – Alzheimer’s disease, ALS – amyotrophic lateral sclerosis, aFTLD-U – atypical frontotemporal lobar degeneration with ubiquitin positive inclusions, AGD – argyrophilic grain disease, bvFTD – behavioral variant frontotemporal dementia, CBD – corticobasal degeneration, FTDP-17 – frontotemporal dementia and parkinsonism linked to chromosome 17, FTLD – frontotemporal lobar degeneration, FTLD-UPS – frontotemporal lobar degeneration with ubiquitin proteasome system positive inclusions, FUS – fused in sarcoma, MND – motor neuron disease, NPI – neuropsychiatric inventory, PiD – Pick’s disease, PSP – progressive supranuclear palsy, TDP-43 – transactive response DNA binding protein 43 kDA, TDP-U – unclassifiable TDP-43

**Supplementary Table 5 – Clinical features by pathological diagnosis (high confidence bvFTD)**

|                                                                                         | Primary diagnosis |                      |          |          | FTLD major molecular class |                      |               |                | FTLD major molecular class subtypes |          |          |              |          |                       |                         |                           |            |                                   |                                     |
|-----------------------------------------------------------------------------------------|-------------------|----------------------|----------|----------|----------------------------|----------------------|---------------|----------------|-------------------------------------|----------|----------|--------------|----------|-----------------------|-------------------------|---------------------------|------------|-----------------------------------|-------------------------------------|
|                                                                                         | All cases, n=68   | FTLD pathology, n=63 | AD, n=4  | ALS, n=1 | FTLD-Tau, n=18             | FTLD-TDP, n=38       | FTLD-FUS, n=7 | FTLD-UPS, n=0  | Pick's, n=8                         | CBD, n=3 | PSP, n=2 | FTDP-17, n=2 | AGD, n=0 | Unclassified tau, n=3 | TDP-A, n=7 (1 with MND) | TDP-B, n=20 (15 with MND) | TDP-C, n=3 | TDP-U, n=8 (7 with MND)           | aFTLD-U, n=7                        |
| Met at least possible bvFTD criteria                                                    | 94, 96            | 95, 97               | 100, 100 | 0, 0     | 94, 94                     | 95, 97               | 100, 100      |                | 100, 100                            | 100, 100 | 100, 100 | 100, 100     |          | 67, 67                | 100, 100                | 95, 95                    | 100, 100   | 88, 100                           | 100, 100                            |
| Met probable bvFTD criteria (n listed if imaging not available to fully apply criteria) | 83, 87            | 83 (n=58), 87 (n=62) | 100, 100 | 0, 0     | 94 (n=17), 94              | 79 (n=34), 86 (n=37) | 86, 86        |                | 100 (n=7), 100                      | 100, 100 | 100, 100 | 100, 100     |          | 67, 67                | 60 (n=5), 71            | 89 (n=18), 95 (n=19)      | 100, 100   | 63, 75                            | 86, 86                              |
| Met definite bvFTD criteria                                                             | 27                | 29                   | 0        | 0        | 11                         | 42                   | 0             | 0 <sup>d</sup> | 0                                   | 0        | 100      |              | 0        | 71 <sup>a</sup>       | 30                      | 0                         | 63         | 0                                 |                                     |
| <b>Early Disinhibition</b>                                                              | 88, 91            | 89, 92               | 100, 100 | 0, 0     | 89, 89                     | 87, 92               | 100, 100      |                | 75, 75                              | 100, 100 | 100, 100 | 100, 100     |          | 100, 100              | 86, 100                 | 85, 90                    | 100, 100   | 88, 88                            | 100, 100                            |
| Inappropriate                                                                           | 66, 71            | 65, 70               | 100, 100 | 0, 0     | 67, 72                     | 61, 63               | 86, 100       |                | 63, 63                              | 67, 100  | 100, 100 | 100, 100     |          | 33, 33                | 57, 57                  | 65, 70                    | 100, 100   | 38, 38                            | 86, 100                             |
| Loss of manners                                                                         | 60, 65            | 62, 67               | 50, 50   | 0, 0     | 67, 67                     | 55, 63               | 86, 86        |                | 50, 50                              | 100, 100 | 100, 100 | 50, 50       |          | 67, 67                | 57, 86                  | 50, 55                    | 67, 67     | 63, 63                            | 86, 86                              |
| Impulsive                                                                               | 63, 65            | 65, 67               | 50, 50   | 0, 0     | 67, 67                     | 58, 61               | 100, 100      |                | 50, 50                              | 67, 67   | 100, 100 | 50, 50       |          | 100, 100              | 57, 71                  | 70, 70                    | 0, 0       | 50, 50                            | 100, 100                            |
| <b>Early Apathy</b>                                                                     | 82, 84            | 84, 84               | 50, 75   | 100, 100 | 78, 78                     | 87, 87               | 86, 86        |                | 88, 88                              | 100, 100 | 100, 100 | 50, 50       |          | 33, 33                | 86, 86                  | 90, 90                    | 67, 67     | 88, 88                            | 86, 86                              |
| Apathy                                                                                  | 82, 85            | 84, 86               | 50, 75   | 100, 100 | 78, 78                     | 87, 90               | 86, 86        |                | 88, 88                              | 100, 100 | 100, 100 | 50, 50       |          | 33, 33                | 86, 86                  | 90, 95                    | 67, 67     | 88, 88                            | 86, 86                              |
| Inertia                                                                                 | 22, 28            | 24, 29               | 0, 25    | 0, 0     | 17, 22                     | 26, 29               | 29, 43        |                | 13, 13                              | 33, 33   | 50, 50   | 0, 0         |          | 0, 33                 | 29, 43                  | 35, 35                    | 33, 33     | 0, 0                              | 29, 43                              |
| <b>Early Loss of sympathy/empathy</b>                                                   | 56, 62            | 56, 62               | 75, 75   | 0, 0     | 72, 78                     | 45, 53               | 71, 71        |                | 88, 100                             | 67, 67   | 50, 50   | 100, 100     |          | 33, 33                | 43, 57                  | 45, 55                    | 67, 67     | 38, 38                            | 71, 71                              |
| Lacking empathy                                                                         | 41, 46            | 40, 44               | 75, 75   | 0, 0     | 50, 50                     | 29, 37               | 71, 71        |                | 50, 50                              | 67, 67   | 50, 40   | 50, 50       |          | 33, 33                | 14, 43                  | 25, 30                    | 67, 67     | 38, 38                            | 71, 71                              |
| Lacking warmth                                                                          | 46, 49            | 48, 51               | 25, 25   | 0, 0     | 56, 61                     | 40, 42               | 71, 71        |                | 75, 88                              | 33, 33   | 0, 0     | 100, 100     |          | 33, 33                | 43, 43                  | 35, 40                    | 67, 67     | 38, 38                            | 71, 71                              |
| <b>Early Compulsive behavior</b>                                                        | 74, 81            | 76, 83               | 50, 75   | 0, 0     | 78, 89                     | 71, 76               | 100, 100      |                | 88, 88                              | 67, 100  | 50, 100  | 100, 100     |          | 67, 67                | 86, 86                  | 60, 70                    | 100, 100   | 75, 75                            | 100, 100                            |
| Simple repetitive behavior                                                              | 31, 40            | 32, 41               | 25, 25   | 0, 0     | 22, 39                     | 32, 40               | 57, 57        |                | 13, 25                              | 0, 33    | 50, 50   | 50, 50       |          | 33, 67                | 57, 57                  | 15, 25                    | 33, 33     | 50, 63                            | 57, 57                              |
| Complex compulsions                                                                     | 62, 66            | 64, 68               | 50, 50   | 0, 0     | 72, 83                     | 53, 55               | 100, 100      |                | 75, 75                              | 67, 100  | 50, 100  | 100, 100     |          | 67, 67                | 71, 71                  | 50, 55                    | 100, 100   | 25 <sup>i</sup> , 25 <sup>h</sup> | 100 <sup>e</sup> , 100 <sup>e</sup> |
| Stereotypic speech                                                                      | 21, 28            | 22, 29               | 0, 25    | 0, 0     | 17, 28                     | 18, 24               | 57, 57        |                | 13, 38                              | 33, 33   | 50, 50   | 0, 0         |          | 0, 0                  | 29, 29                  | 25, 35                    | 0, 0       | 0, 0                              | 57, 57                              |
| <b>Eating behavior</b>                                                                  | 84, 90            | 84, 91               | 100, 100 | 0, 0     | 83, 94                     | 84, 90               | 84, 86        |                | 88, 100                             | 100, 100 | 50, 100  | 100, 100     |          | 67, 67                | 86, 100                 | 90, 90                    | 67, 67     | 75, 88                            | 86, 86                              |

|                           |        |        |          |          |                     |                     |          |  |         |          |          |          |  |          |         |        |          |        |          |
|---------------------------|--------|--------|----------|----------|---------------------|---------------------|----------|--|---------|----------|----------|----------|--|----------|---------|--------|----------|--------|----------|
| Change in food preference | 66, 75 | 67, 75 | 75, 100  | 0, 0     | 67, 78              | 66, 74              | 71, 71   |  | 63, 75  | 67, 100  | 50, 50   | 100, 100 |  | 67, 67   | 86, 100 | 65, 70 | 67, 67   | 50, 63 | 71, 71   |
| Binge eating              | 62, 72 | 62, 73 | 75, 75   | 0, 0     | 78, 94 <sup>2</sup> | 53, 63 <sup>1</sup> | 71, 71   |  | 88, 100 | 100, 100 | 50, 100  | 100, 100 |  | 33, 67   | 57, 71  | 50, 60 | 67, 67   | 50, 63 | 71, 71   |
| Oral exploration          | 12, 15 | 11, 14 | 25, 25   | 0, 0     | 6, 11               | 11, 11              | 29, 43   |  | 0, 0    | 0, 0     | 0, 50    | 50, 50   |  | 0, 0     | 29, 29  | 10, 10 | 0, 0     | 0, 0   | 29, 43   |
| <b>Neuropsych Pattern</b> | 29, 29 | 30, 30 | 25, 25   | 0, 0     | 29, 29              | 32, 32              | 20, 20   |  | 38, 38  | 33, 33   | 0, 0     |          |  | 0, 0     | 0, 0    | 44, 44 | 33, 33   | 38, 38 | 20, 20   |
| Executive impairment      | 88, 92 | 89, 93 | 100, 100 | 0, 0     | 93, 100             | 88, 91              | 83, 83   |  | 88, 100 | 100, 100 | 100, 100 |          |  | 100, 100 | 86, 100 | 94, 94 | 100, 100 | 75, 75 | 83, 83   |
| Memory preserved          | 37, 37 | 39, 39 | 25, 25   | 0, 0     | 36, 36              | 41, 41              | 33, 33   |  | 50, 50  | 33, 33   | 0, 0     |          |  | 0, 0     | 0, 0    | 44, 44 | 33, 33   | 75, 75 | 33, 33   |
| Visuospatial Preserved    | 75, 76 | 76, 78 | 50, 50   | 100, 100 | 86, 86              | 69, 71              | 100, 100 |  | 88, 88  | 100, 100 | 50, 50   |          |  | 100, 100 | 71, 71  | 65, 71 | 67, 67   | 75, 75 | 100, 100 |

Statistical analyses were conducted on groups with N≥4 only.

Unless otherwise specified, results are formatted as % with feature at first evaluation, % with feature at any point in disease course. Highlighting indicates a significant difference (p<.05) existed in ANOVA (continuous variables) or chi square (categorical variables) among the highlighted groups. Yellow indicates the significant difference existed at the time of first evaluation. Blue indicates the significant difference is present at any point in the disease course. Green indicates that the significant difference was present both at first evaluation and throughout disease course.

Comparison of primary diagnoses: Chi square or Fisher's exact test if expected cell count <5 for categorical variables, ANOVA with Bonferroni post-hoc, p<.05

\*=significant difference between FTLD and AD

Comparison of FTLD major molecular classes: Chi square for categorical variables, ANOVA with Bonferroni post-hoc, p<.05

1=significantly different from FTLD-Tau

2=significantly different from FTLD-TDP

3=significantly different from FTLD-FUS

Comparison of FTLD major molecular class subtypes: Chi square for categorical variables, ANOVA with Bonferroni post-hoc, p<.05

a=significantly different from Pick's

b=significantly different from CBD

c=significantly different from PSP

d=significantly different from TDP-A

e=significantly different from TDP-B

f=significantly different from TDP-C

g=significantly different from TDP-U

h=significantly different from aFTLD-U

AD – Alzheimer's disease, ALS – amyotrophic lateral sclerosis, aFTLD-U – atypical frontotemporal lobar degeneration with ubiquitin positive inclusions, AGD – argyrophilic grain disease, bvFTD – behavioral variant frontotemporal dementia, CBD – corticobasal degeneration, FTDP-17 – frontotemporal dementia and parkinsonism linked to chromosome 17, FTLD – frontotemporal lobar degeneration, FTLD-UPS – frontotemporal lobar degeneration with ubiquitin proteasome system positive inclusions, FUS – fused in sarcoma, MND – motor neuron disease, PiD – Pick's disease, PSP – progressive supranuclear palsy, TDP-43 – transactive response DNA binding protein 43 kDa, TDP-U – unclassifiable TDP-43

**Supplementary table 6 – Clinical features by pathological diagnosis among patients meeting FTDC possible bvFTD criteria**

|                                       | Primary diagnosis |                      |              |          | FTLD major molecular class |                           |                             |               |                           | FTLD major molecular class subtypes |                           |              |          |                       |                           |                           |                           |                           |                                     |
|---------------------------------------|-------------------|----------------------|--------------|----------|----------------------------|---------------------------|-----------------------------|---------------|---------------------------|-------------------------------------|---------------------------|--------------|----------|-----------------------|---------------------------|---------------------------|---------------------------|---------------------------|-------------------------------------|
|                                       | All cases, n=100  | FTLD pathology, n=90 | AD, n=9      | ALS, n=1 | FTLD-Tau, n=29             | FTLD-TDP, n=52            | FTLD-FUS, n=8               | FTLD-UPS, n=1 | PiD, n=8                  | CBD, n=8                            | PSP, n=8                  | FTDP-17, n=3 | AGD, n=0 | Unclassified tau, n=2 | TDP-A, n=8 (1 with MND)   | TDP-B, n=25 (19 with MND) | TDP-C, n=8                | TDP-U, n=11 (8 with MND)  | aFTLD-U, n=8                        |
| Male, n (%)                           | 72 (72.0)         | 65 (72.2)            | 6 (66.7)     | 1 (100)  | 23 (79.3)                  | 34 (65.4)                 | 7 (87.5)                    | 1 (100)       | 7 (87.5)                  | 5 (62.5)                            | 6 (75.0)                  | 3 (100)      |          | 2 (100)               | 5 (62.5)                  | 18 (72.0)                 | 4 (50.0)                  | 7 (63.6)                  | 7 (87.5)                            |
| Age of onset – mean (range)           | 55.2 (18-80)      | 55.0 (18-73)         | 57.4 (34-80) | 51.0     | 58.2 <sup>3</sup> (49-71)  | 55.4 <sup>3</sup> (18-73) | 41.1 <sup>1,2</sup> (26-54) | 51.0          | 58.0 <sup>h</sup> (49-71) | 59.9 <sup>h</sup> (53-71)           | 59.6 <sup>h</sup> (49-68) | 50.3 (50-51) |          | 58.5 (49-68)          | 54.4 (45-64)              | 55.2 <sup>h</sup> (18-73) | 58.5 <sup>h</sup> (44-71) | 54.5 (42-66)              | 41.1 <sup>a,b,c,e,f</sup> (26-54)   |
| Age at presentation – mean (range)    | 60.4 (29-83)      | 60.24 (29-78)        | 62.8 (43-83) | 55.0     | 63.7 <sup>3</sup> (53-77)  | 60.8 <sup>3</sup> (44-78) | 45.0 <sup>1,2</sup> (29-55) | 53.0          | 62.5 <sup>h</sup> (53-73) | 64.6 <sup>h</sup> (56-77)           | 65.3 <sup>h</sup> (58-72) | 59.0 (58-60) |          | 65.0 (57-73)          | 58.1 <sup>h</sup> (48-69) | 61.6 <sup>h</sup> (44-78) | 63.5 <sup>h</sup> (52-75) | 59.2 <sup>h</sup> (50-70) | 45.0 <sup>a,b,c,d,e,f</sup> (29-55) |
| Age at death – mean (range)           | 63.9 (35-90)      | 63.6 (35-80)         | 67.7 (49-90) | 58.0     | 66.9 <sup>3</sup> (57-79)  | 64.3 <sup>3</sup> (47-80) | 48.3 <sup>1,2</sup> (35-57) | 55.0          | 66.3 <sup>h</sup> (57-74) | 67.6 <sup>h</sup> (61-79)           | 69.6 <sup>h</sup> (63-77) | 60.7 (60-62) |          | 65.5 (58-73)          | 62.3 <sup>h</sup> (49-76) | 64.1 <sup>h</sup> (47-80) | 70.0 <sup>h</sup> (62-76) | 62.0 <sup>h</sup> (53-73) | 48.3 <sup>a,b,c,d,e,f</sup> (35-57) |
| <b>FTDC diagnostic criteria</b>       |                   |                      |              |          |                            |                           |                             |               |                           |                                     |                           |              |          |                       |                           |                           |                           |                           |                                     |
| Met probable bvFTD criteria           | 77                | 78                   | 78           | 0        | 72                         | 81                        | 75                          | 100           | 100                       | 63                                  | 50                        | 67           |          | 100                   | 63                        | 84                        | 100                       | 100                       | 75                                  |
| <b>Early Disinhibition</b>            | 87, 95            | 88, 96               | 78, 89       | 100, 100 | 90, 93                     | 87, 96                    | 88, 100                     | 100, 100      | 75, 75                    | 100, 100                            | 88, 100                   | 100, 100     |          | 100, 100              | 88, 100                   | 88, 96                    | 75, 100                   | 91, 91                    | 88, 100                             |
| Inappropriate                         | 60, 70            | 60, 69               | 67, 78       | 0, 100   | 66, 72                     | 54, 63                    | 75, 88                      | 100, 100      | 63, 63                    | 75, 100                             | 50, 50                    | 100, 100     |          | 50, 50                | 50, 50                    | 60, 64                    | 63, 88                    | 36, 55                    | 75, 88                              |
| Loss of manners                       | 60, 71            | 62, 72               | 44, 67       | 0, 0     | 62, 69                     | 60, 71                    | 75, 88                      | 100, 100      | 50, 50                    | 50, 75                              | 75, 75                    | 67, 67       |          | 100, 100              | 63, 88                    | 60, 68                    | 38, 63                    | 73, 73                    | 75, 88                              |
| Impulsive                             | 54, 68            | 57, 71               | 22, 33       | 100, 100 | 52, 69                     | 54, 69                    | 88, 88                      | 100, 100      | 50, 50                    | 50, 63                              | 50, 100                   | 33, 33       |          | 100, 100              | 50, 75                    | 64, 80                    | 25, 38                    | 55, 64                    | 88, 88                              |
| <b>Early Apathy</b>                   | 81, 84            | 82, 84               | 67, 78       | 100, 100 | 83, 83                     | 81, 85                    | 88, 88                      | 100, 100      | 88, 88                    | 88, 88                              | 88, 88                    | 67, 67       |          | 50, 50                | 88, 88                    | 84, 88                    | 50, 63                    | 91, 91                    | 88, 88                              |
| Apathy                                | 81, 87            | 82, 88               | 67, 78       | 100, 100 | 83, 83                     | 81, 90                    | 88, 88                      | 100, 100      | 88, 88                    | 88, 88                              | 88, 88                    | 67, 67       |          | 50, 50                | 88, 88                    | 84, 96                    | 50, 75                    | 91, 91                    | 88, 88                              |
| Inertia                               | 19, 26            | 19, 26               | 22, 33       | 0, 0     | 10, 14                     | 23, 29                    | 25, 38                      | 0, 100        | 13, 13                    | 13, 13                              | 13, 13                    | 0, 0         |          | 0, 50                 | 25, 38                    | 28, 36                    | 13, 13                    | 18, 18                    | 25, 38                              |
| <b>Early Loss of sympathy/empathy</b> | 52, 58            | 52, 59               | 56, 56       | 0, 0     | 52, 55                     | 50, 60                    | 63, 63                      | 100, 100      | 88, 100                   | 25, 25                              | 38, 38                    | 67, 67       |          | 50, 50                | 50, 63                    | 44, 56                    | 88, 88                    | 36, 45                    | 63, 63                              |
| Lacking empathy                       | 38, 44            | 38, 43               | 44, 56       | 0, 0     | 38, 41                     | 33, 40                    | 63, 63                      | 100, 100      | 50, 50                    | 25, 38                              | 38, 38                    | 33, 33       |          | 50, 50                | 25, 50                    | 24, 32                    | 63, 63                    | 36, 36                    | 63, 63                              |
| Lacking warmth                        | 41, 45            | 43, 48               | 22, 22       | 0, 0     | 38, 41                     | 44, 50                    | 63, 63                      | 0, 0          | 75, 88                    | 13, 13                              | 13, 13                    | 67, 67       |          | 50, 50                | 50, 50                    | 36, 44                    | 75, 75                    | 36, 45                    | 63, 63                              |
| <b>Early Compulsive behavior</b>      | 73, 85            | 77, 87               | 44, 78       | 0, 0     | 79, 93                     | 73, 81                    | 88, 100                     | 100, 100      | 88, 88                    | 75, 88                              | 63, 100                   | 100, 100     |          | 100, 100              | 88, 88                    | 60, 72                    | 88, 100                   | 82, 82                    | 88, 100                             |
| Simple repetitive behavior            | 30, 43            | 32, 46               | 11, 22       | 0, 0     | 24, 41                     | 33, 44                    | 50, 63                      | 100, 100      | 13, 25                    | 13, 38                              | 38, 50                    | 33, 33       |          | 50, 100               | 63, 63                    | 16, 28                    | 25, 50                    | 55, 64                    | 50, 63                              |
| Complex compulsions                   | 63, 72            | 66, 73               | 44, 67       | 0, 0     | 72, 90                     | 58, 62                    | 88, 88                      | 100, 100      | 75, 75                    | 75, 100                             | 50, 88                    | 100, 100     |          | 100, 100              | 63, 63                    | 52, 56                    | 88, 100                   | 45, 45                    | 88, 88                              |
| Stereotypic speech                    | 19, 26            | 21, 28               | 0, 11        | 0, 0     | 17, 28                     | 19, 23                    | 50, 63                      | 0, 0          | 13, 38                    | 25, 38                              | 13, 13                    | 33, 33       |          | 0, 0                  | 25, 25                    | 24, 32                    | 13, 13                    | 9, 9                      | 50, 63                              |

|                                                        | Primary diagnosis |                      |          |          | FTLD major molecular class |                      |                   |               | FTLD major molecular class subtypes |                      |                        |              |          |                       |                         |                           |                        |                          |                     |
|--------------------------------------------------------|-------------------|----------------------|----------|----------|----------------------------|----------------------|-------------------|---------------|-------------------------------------|----------------------|------------------------|--------------|----------|-----------------------|-------------------------|---------------------------|------------------------|--------------------------|---------------------|
|                                                        | All cases, n=100  | FTLD pathology, n=90 | AD, n=9  | ALS, n=1 | FTLD-Tau, n=29             | FTLD-TDP, n=52       | FTLD-FUS, n=8     | FTLD-UPS, n=1 | PiD, n=8                            | CBD, n=8             | PSP, n=8               | FTDP-17, n=3 | AGD, n=0 | Unclassified tau, n=2 | TDP-A, n=8 (1 with MND) | TDP-B, n=25 (19 with MND) | TDP-C, n=8             | TDP-U, n=11 (8 with MND) | aFTLD-U, n=8        |
| <b>Eating behavior</b>                                 | 74, 89            | 76, 90               | 67, 78   | 0, 100   | 76, 90                     | 75, 90               | 75, 88            | 100, 100      | 88, 100                             | 63, 75               | 63, 88                 | 100, 100     |          | 100, 100              | 75, 100                 | 84, 92                    | 63, 88                 | 64, 82                   | 75, 88              |
| Change in food preference                              | 59, 75            | 61, 76               | 44, 67   | 0, 100   | 59, 72                     | 62, 79               | 63, 63            | 100, 100      | 63, 75                              | 25, 63               | 63, 63                 | 100, 100     |          | 100, 100              | 75, 100                 | 64, 76                    | 63, 88                 | 45, 64                   | 63, 63              |
| Binge eating                                           | 52, 67            | 52, 68               | 56, 67   | 0, 0     | 62, 79                     | 44, 62               | 63, 63            | 100, 100      | 88, 100                             | 63, 75               | 38, 63                 | 67, 67       |          | 50, 100               | 50, 75                  | 44, 56                    | 38, 75                 | 45, 55                   | 63, 63              |
| Oral exploration                                       | 9, 15             | 9, 14                | 11, 22   | 0, 0     | 7, 14                      | 8, 10                | 25, 50            | 0, 0          | 0, 0                                | 0, 13                | 13, 25                 | 33, 33       |          | 0, 0                  | 25, 25                  | 8, 8                      | 0, 13                  | 0, 0                     | 25, 50              |
| <b>Neuropsych Pattern</b>                              | 28, 29            | 28, 29               | 22, 22   | 100, 100 | 35, 35                     | 26, 28               | 17, 17            | 0, 0          | 38, 38                              | 38, 38               | 38, 38                 | 0, 0         |          | 0, 0                  | 0, 0                    | 35, 40                    | 14, 14                 | 36, 36                   | 17, 17              |
| Executive impairment                                   | 88, 91            | 86, 90               | 100, 100 | 100, 100 | 96, 100                    | 80, 85               | 86, 86            | 100, 100      | 88, 100                             | 100, 100             | 100, 100               | 100, 100     |          | 100, 100              | 88, 100                 | 85, 90                    | 71, 71                 | 73, 73                   | 86, 86              |
| Memory preserved                                       | 40, 40            | 41, 41               | 22, 22   | 100, 100 | 50, 50                     | 39, 39               | 29, 29            | 0, 0          | 50, 50                              | 50, 50               | 63, 63                 | 0, 0         |          | 0, 0                  | 0, 0                    | 40, 40                    | 29, 29                 | 73, 73                   | 29, 29              |
| Visuospatial Preserved                                 | 72, 73            | 74, 75               | 56, 56   | 100, 100 | 69, 69                     | 74, 77               | 83, 83            | 100, 100      | 88, 88                              | 63, 63               | 50, 50                 | 100, 100     |          | 100, 100              | 75, 75                  | 71, 76                    | 86, 86                 | 73, 73                   | 83, 83              |
| <b>Other cognitive, behavioral, and motor symptoms</b> |                   |                      |          |          |                            |                      |                   |               |                                     |                      |                        |              |          |                       |                         |                           |                        |                          |                     |
| Memory                                                 | 38, 48            | 38, 48               | 44, 56   | 0, 0     | 45, 59                     | 37, 46               | 13, 13            | 100, 100      | 25, 38                              | 75, 100 <sup>h</sup> | 25, 38                 | 67, 67       |          | 50, 50                | 63, 63                  | 40, 44                    | 13, 38                 | 27, 45                   | 13, 13 <sup>b</sup> |
| Language                                               | 36, 48            | 36, 46               | 44, 67   | 0, 100   | 17 <sup>b</sup> , 31       | 44 <sup>a</sup> , 54 | 38, 38            | 100, 100      | 13, 13 <sup>f</sup>                 | 13, 38               | 13, 25                 | 33, 33       |          | 50, 100               | 38, 50                  | 44, 56                    | 88, 100 <sup>a,g</sup> | 18, 18 <sup>f</sup>      | 38, 38              |
| Executive (plan, organize, multitask, problem-solve)   | 76, 80            | 74, 79               | 89, 89   | 100, 100 | 72, 76                     | 75, 81               | 75, 75            | 100, 100      | 88, 88                              | 63, 75               | 75, 75                 | 67, 67       |          | 50, 50                | 100, 100                | 72, 80                    | 38, 50                 | 91, 91                   | 75, 75              |
| Gets lost                                              | 11, 13            | 11, 12               | 11, 11   | 0, 100   | 14, 14                     | 10, 12               | 0, 0              | 100, 100      | 13, 13                              | 25, 25               | 0, 0                   | 33, 33       |          | 0, 0                  | 25, 25                  | 12, 12                    | 0, 0                   | 0, 9                     | 0, 0                |
| Visual misperception                                   | 3, 5              | 2, 4                 | 11, 11   | 0, 0     | 7, 10                      | 0, 0                 | 0, 13             | 0, 0          | 13, 13                              | 0, 13                | 13, 13                 | 0, 0         |          | 0, 0                  | 0, 0                    | 0, 0                      | 0, 0                   | 0, 0                     | 0, 13               |
| Prosopagnosia                                          | 9, 13             | 10, 14               | 0, 0     | 0, 0     | 10, 10                     | 10, 17               | 13, 13            | 0, 0          | 0, 0                                | 25, 25               | 0, 0                   | 0, 0         |          | 50, 50                | 0, 0                    | 8, 12                     | 38, 63                 | 0, 9                     | 13, 13              |
| Falls                                                  | 24, 35            | 26, 37               | 0, 11    | 100, 100 | 28, 38                     | 25, 38               | 13, 13            | 100, 100      | 0, 0                                | 25, 50               | 75, 75                 | 0, 0         |          | 0, 50                 | 25, 25                  | 32, 52                    | 0, 0                   | 27, 45                   | 13, 13              |
| Dysphagia                                              | 31, 45            | 32, 48*              | 11, 11*  | 100, 100 | 28, 48                     | 37, 50               | 25, 25            | 0, 100        | 13, 13 <sup>c</sup>                 | 25, 38               | 50, 100 <sup>a,f</sup> | 33, 33       |          | 0, 50                 | 25, 63                  | 48, 60                    | 0, 0 <sup>c</sup>      | 45, 55                   | 25, 25              |
| Depression                                             | 29, 30            | 28, 29               | 33, 33   | 100, 100 | 28, 31                     | 29, 29               | 25, 25            | 0, 0          | 25, 25                              | 50, 63               | 25, 25                 | 0, 0         |          | 0, 0                  | 38, 38                  | 28, 28                    | 38, 38                 | 18, 18                   | 25, 25              |
| Anxiety                                                | 32, 36            | 32, 36               | 22, 33   | 100, 100 | 31, 31                     | 35, 40               | 13, 13            | 100, 100      | 38, 38                              | 50, 50               | 13, 13                 | 33, 33       |          | 0, 0                  | 38, 38                  | 36, 44                    | 25, 38                 | 36, 36                   | 13, 13              |
| Delusions                                              | 26, 34            | 28, 34               | 11, 33   | 0, 0     | 14, 21                     | 38, 46 <sup>c</sup>  | 0, 0 <sup>b</sup> | 100, 100      | 25, 25                              | 0, 25                | 0, 0 <sup>d</sup>      | 33, 33       |          | 50, 50                | 75, 88 <sup>c,h</sup>   | 40, 44                    | 13, 25                 | 27, 36                   | 0, 0 <sup>d</sup>   |
| Hallucinations                                         | 11, 18            | 12, 19               | 0, 11    | 0, 0     | 10, 17                     | 15, 23               | 0, 0              | 0, 0          | 0, 0                                | 25, 50               | 0, 0                   | 33, 33       |          | 0, 0                  | 13, 13                  | 24, 36                    | 0, 0                   | 9, 18                    | 0, 0                |
| Mental rigidity                                        | 47, 59            | 51*, 62*             | 0*, 22*  | 100, 100 | 52, 52                     | 50, 69               | 50, 50            | 100, 100      | 50, 50                              | 50, 50               | 38, 38                 | 100, 100     |          | 50, 50                | 50, 63                  | 60, 80                    | 38, 75                 | 36, 45                   | 50, 50              |
| Aggression                                             | 29, 40            | 32, 41               | 0, 33    | 0, 0     | 38, 48                     | 27, 35               | 38, 50            | 100, 100      | 50, 50                              | 25, 50               | 38, 50                 | 33, 33       |          | 50, 50                | 13, 38                  | 32, 36                    | 25, 25                 | 27, 36                   | 38, 50              |

|                                             | Primary diagnosis |                      | FTLD major molecular class |          |                                 |                                     |                   |               | FTLD major molecular class subtypes |          |                     |              |          |                       |                         |                           |                                   |                          |              |
|---------------------------------------------|-------------------|----------------------|----------------------------|----------|---------------------------------|-------------------------------------|-------------------|---------------|-------------------------------------|----------|---------------------|--------------|----------|-----------------------|-------------------------|---------------------------|-----------------------------------|--------------------------|--------------|
|                                             | All cases, n=100  | FTLD pathology, n=90 | AD, n=9                    | ALS, n=1 | FTLD-Tau, n=29                  | FTLD-TDP, n=52                      | FTLD-FUS, n=8     | FTLD-UPS, n=1 | PiD, n=8                            | CBD, n=8 | PSP, n=8            | FTDP-17, n=3 | AGD, n=0 | Unclassified tau, n=2 | TDP-A, n=8 (1 with MND) | TDP-B, n=25 (19 with MND) | TDP-C, n=8                        | TDP-U, n=11 (8 with MND) | aFTLD-U, n=8 |
| Pseudobulbar affect                         | 7, 13             | 7, 13                | 0, 0                       | 100, 100 | 0, 7                            | 12, 19                              | 0, 0              | 0, 0          | 0, 0                                | 0, 13    | 0, 13               | 0, 0         |          | 0, 0                  | 0, 0                    | 20, 32                    | 0, 0                              | 9, 18                    | 0, 0         |
| Hyperreligiosity                            | 8, 10             | 9, 11                | 0, 0                       | 0, 0     | 10, 10                          | 8, 10                               | 13, 13            | 0, 100        | 0, 0                                | 13, 13   | 13, 13              | 33, 33       |          | 0, 0                  | 0, 0                    | 8, 8                      | 13, 25                            | 9, 9                     | 13, 13       |
| Criminal behavior                           | 20, 28            | 20, 28               | 22, 33                     | 0, 0     | 28, 31                          | 15, 27                              | 25, 25            | 0, 0          | 13, 25                              | 13, 13   | 38, 38              | 67, 67       |          | 50, 50                | 13, 38                  | 8, 16                     | 25, 50                            | 27, 27                   | 25, 25       |
| Hypersexual                                 | 16, 17            | 16, 17               | 22, 22                     | 0, 0     | 14, 14                          | 17, 17                              | 13, 25            | 0, 0          | 13, 13                              | 25, 25   | 0, 0                | 0, 0         |          | 50, 50                | 25, 25                  | 20, 20                    | 0, 0                              | 18, 18                   | 13, 25       |
| Hyposexual                                  | 9, 9              | 9, 9                 | 11, 11                     | 0, 0     | 3, 3                            | 10, 10                              | 13, 13            | 100, 100      | 13, 13                              | 0, 0     | 0, 0                | 0, 0         |          | 0, 0                  | 0, 0                    | 0, 0                      | 50 <sup>f</sup> , 50 <sup>f</sup> | 9, 9                     | 13, 13       |
| Increased drug/etoh use                     | 21, 22            | 22, 23               | 11, 11                     | 0, 0     | 17, 17                          | 23, 25                              | 38, 38            | 0, 0          | 38, 38                              | 0, 0     | 0, 0                | 67, 67       |          | 0, 0                  | 50, 50                  | 20, 20                    | 13, 25                            | 18, 18                   | 38, 38       |
| Lacking insight                             | 90, 92            | 91, 92               | 89, 100                    | 0, 0     | 90, 90                          | 90, 92                              | 100, 100          | 100, 100      | 88, 88                              | 88, 88   | 88, 88              | 100, 100     |          | 100, 100              | 100, 100                | 84, 88                    | 88, 88                            | 100, 100                 | 100, 100     |
| <b>Neurological examination features</b>    |                   |                      |                            |          |                                 |                                     |                   |               |                                     |          |                     |              |          |                       |                         |                           |                                   |                          |              |
| Dysarthria                                  | 19, 31            | 20, 33               | 0, 0                       | 100, 100 | 14, 24                          | 25, 40                              | 13, 13            | 0, 100        | 13, 13                              | 0, 0     | 38, 63              | 0, 0         |          | 0, 50                 | 0, 38                   | 32, 44                    | 13, 13                            | 36, 55                   | 13, 13       |
| Saccadic eye movement – delayed initiation  | 18, 31            | 18, 32               | 11, 11                     | 100, 100 | 28, 41                          | 12, 23                              | 25, 50            | 0, 100        | 0, 0                                | 50, 50   | 13, 63              | 67, 67       |          | 50, 50                | 13, 13                  | 20, 40                    | 0, 0                              | 0, 9                     | 25, 50       |
| Saccadic eye movement - slowed velocity     | 15, 24            | 16, 26               | 0, 0                       | 100, 100 | 21, 34                          | 12, 19                              | 25, 25            | 0, 100        | 0, 0                                | 0, 38    | 38, 50              | 67, 67       |          | 50, 50                | 13, 25                  | 20, 28                    | 0, 0                              | 0, 9                     | 25, 25       |
| Saccadic eye movement – decreased amplitude | 11, 23            | 11, 23               | 0, 11                      | 100, 100 | 17, 34                          | 8, 17                               | 13, 13            | 0, 100        | 0, 0                                | 0, 38    | 50, 75              | 33, 33       |          | 0, 0                  | 0, 0                    | 12, 24                    | 0, 0                              | 9, 27                    | 13, 13       |
| Rigidity – appendicular                     | 39, 56            | 39, 54               | 44, 78                     | 0, 0     | 52, 66                          | 33, 48                              | 25, 50            | 100, 100      | 25, 38                              | 50, 75   | 75, 88              | 67, 67       |          | 50, 50                | 50, 88                  | 36, 44                    | 0, 25                             | 36, 45                   | 25, 50       |
| Rigidity – axial                            | 17, 32            | 18, 32               | 11, 33                     | 0, 0     | 24, 45                          | 13, 25                              | 25, 25            | 0, 100        | 0, 0                                | 25, 50   | 25, 75              | 67, 67       |          | 50, 50                | 13, 38                  | 16, 24                    | 0, 13                             | 18, 27                   | 25, 25       |
| Tremor – rest                               | 5, 11             | 6, 11                | 0, 11                      | 0, 0     | 7, 10                           | 6, 12                               | 0, 0              | 0, 100        | 0, 0                                | 13, 25   | 13, 13              | 0, 0         |          | 0, 0                  | 13, 25                  | 8, 16                     | 0, 0                              | 0, 0                     | 0, 0         |
| Tremor – action/postural                    | 28, 45            | 30, 44               | 0, 44                      | 100, 100 | 34, 52                          | 25, 40                              | 50, 50            | 0, 0          | 25, 38                              | 38, 63   | 25, 50              | 67, 67       |          | 50, 50                | 13, 25                  | 32, 48                    | 25, 38                            | 18, 36                   | 50, 50       |
| Myoclonus                                   | 3, 5              | 2, 3                 | 11, 22                     | 0, 0     | 0, 0                            | 2, 4                                | 13, 13            | 0, 0          | 0, 0                                | 0, 0     | 0, 0                | 0, 0         |          | 0, 0                  | 0, 13                   | 4, 4                      | 0, 0                              | 0, 0                     | 13, 13       |
| Dystonia                                    | 2, 10             | 2, 11                | 0, 0                       | 0, 0     | 0, 14                           | 2, 8                                | 13, 25            | 0, 0          | 0, 0                                | 0, 38    | 0, 13               | 0, 0         |          | 0, 0                  | 0, 13                   | 0, 8                      | 0, 0                              | 9, 9                     | 13, 25       |
| Bradykinesia                                | 35, 54            | 36, 53               | 22, 56                     | 100, 100 | 34, 55                          | 35, 52                              | 50, 50            | 0, 100        | 0, 0 <sup>c</sup>                   | 50, 75   | 63, 88 <sup>a</sup> | 33, 67       |          | 0, 50                 | 38, 50                  | 36, 60                    | 13, 25                            | 45, 55                   | 50, 50       |
| Apraxia                                     | 12, 26            | 10, 24               | 22, 33                     | 100, 100 | 10, 28                          | 12, 23                              | 0, 13             | 0, 100        | 0, 13                               | 38, 50   | 0, 38               | 0, 0         |          | 0, 0                  | 0, 13                   | 16, 28                    | 0, 13                             | 18, 27                   | 0, 13        |
| Ataxia                                      | 9, 13             | 8, 12                | 11, 11                     | 100, 100 | 14, 21                          | 4, 8                                | 13, 13            | 0, 0          | 0, 0                                | 25, 25   | 25, 50 <sup>e</sup> | 0, 0         |          | 0, 0                  | 13, 38                  | 4, 4 <sup>c</sup>         | 0, 0                              | 0, 0                     | 13, 13       |
| Decreased muscle power                      | 23, 29            | 26, 31               | 0, 0                       | 0, 100   | 7 <sup>b</sup> , 7 <sup>b</sup> | 38 <sup>a</sup> , 48 <sup>b,c</sup> | 0, 0 <sup>b</sup> | 100, 100      | 13, 13                              | 13, 13   | 0, 0                | 0, 0         |          | 0, 0                  | 25, 38                  | 48, 60                    | 0, 0                              | 55, 64                   | 0, 0         |
| Decreased                                   | 24, 30            | 24, 31               | 11, 11                     | 100,     | 14 <sup>b</sup> , 14            | 33 <sup>a</sup> , 44                | 13, 13            | 0, 0          | 13, 13                              | 13, 13   | 13,                 | 33, 33       |          | 0, 0                  | 13, 25                  | 44, 60                    | 0, 0                              | 45, 55                   | 13, 13       |

|                                                                  | Primary diagnosis |                      |                 |          | FTLD major molecular class      |                                     |                                 |               | FTLD major molecular class subtypes |                           |                             |              |          |                       |                         |                              |                               |                                       |                                 |
|------------------------------------------------------------------|-------------------|----------------------|-----------------|----------|---------------------------------|-------------------------------------|---------------------------------|---------------|-------------------------------------|---------------------------|-----------------------------|--------------|----------|-----------------------|-------------------------|------------------------------|-------------------------------|---------------------------------------|---------------------------------|
|                                                                  | All cases, n=100  | FTLD pathology, n=90 | AD, n=9         | ALS, n=1 | FTLD-Tau, n=29                  | FTLD-TDP, n=52                      | FTLD-FUS, n=8                   | FTLD-UPS, n=1 | PiD, n=8                            | CBD, n=8                  | PSP, n=8                    | FTDP-17, n=3 | AGD, n=0 | Unclassified tau, n=2 | TDP-A, n=8 (1 with MND) | TDP-B, n=25 (19 with MND)    | TDP-C, n=8                    | TDP-U, n=11 (8 with MND)              | aFTLD-U, n=8                    |
| muscle bulk                                                      |                   |                      |                 | 100      |                                 |                                     |                                 |               |                                     |                           | 13                          |              |          |                       |                         |                              |                               |                                       |                                 |
| Fasciculations                                                   | 21, 29            | 23, 31               | 0, 0            | 0, 100   | 3 <sup>b</sup> , 3 <sup>b</sup> | 37 <sup>a</sup> , 50 <sup>a,c</sup> | 0, 0 <sup>b</sup>               | 100, 100      | 0, 0 <sup>e</sup>                   | 0, 0 <sup>e</sup>         | 0, 0 <sup>e</sup>           | 33, 33       |          | 0, 0                  | 13, 13                  | 48, 68 <sup>a,b,c,h</sup>    | 13, 13                        | 45, 64                                | 0, 0 <sup>e</sup>               |
| Babinski                                                         | 17, 28            | 18, 30               | 0, 0            | 100, 100 | 14, 28                          | 21, 35                              | 13, 13                          | 0, 0          | 13, 13                              | 13, 38                    | 13, 38                      | 33, 33       |          | 0, 0                  | 13, 38                  | 20, 36                       | 0, 0                          | 45, 55                                | 13, 13                          |
| Brisk reflexes                                                   | 32, 43            | 33, 46               | 11, 11          | 100, 100 | 24, 38                          | 44 <sup>c</sup> , 58 <sup>c</sup>   | 0 <sup>b</sup> , 0 <sup>b</sup> | 0, 0          | 0 <sup>e</sup> , 0 <sup>e</sup>     | 38, 50                    | 13, 38                      | 100, 100     |          | 0, 50                 | 38, 63                  | 44, 60                       | 13, 13                        | 73 <sup>a,h</sup> , 82 <sup>a,h</sup> | 0 <sup>e</sup> , 0 <sup>e</sup> |
| Spasticity                                                       | 7, 11             | 7, 11                | 0, 0            | 100, 100 | 3, 3                            | 10, 15                              | 0, 0                            | 0, 100        | 0, 0                                | 0, 0                      | 13, 13                      | 0, 0         |          | 0, 0                  | 13, 13                  | 4, 8                         | 0, 0                          | 27, 45                                | 0, 0                            |
| Abnormal gait                                                    | 21, 33            | 21, 33               | 11, 22          | 100, 100 | 24, 41                          | 23, 35                              | 0, 0                            | 0, 0          | 13, 13                              | 38, 50                    | 25, 75                      | 0, 0         |          | 50, 50                | 13, 25                  | 28, 40                       | 13, 13                        | 27, 45                                | 0, 0                            |
| Retropulsion                                                     | 11, 19            | 11, 20               | 0, 0            | 100, 100 | 17, 31                          | 8, 13                               | 13, 13                          | 0, 100        | 0, 0                                | 25, 38                    | 38, 63                      | 0, 0         |          | 0, 50                 | 0, 0                    | 12, 20                       | 0, 0                          | 9, 18                                 | 13, 13                          |
| <b>NPI Frequency x severity scores (max of 12), mean (SD), n</b> |                   |                      |                 |          |                                 |                                     |                                 |               |                                     |                           |                             |              |          |                       |                         |                              |                               |                                       |                                 |
| Delusions                                                        | 1.3 (2.9), n=79   | 1.1 (2.7), n=72      | 3.5 (5.2), n=6  | 0        | 0.1 (0.4), n=21                 | 1.7 (3.2), n=43                     | 0 (0), n=7                      | 6             | 0 (0), n=6                          | 0.3 (0.8), n=7            | 0 (0), n=6                  | 0            |          | 0                     | 2.4 (3), n=7            | 2 (3.7), n=21                | 0.2 (0.4), n=5                | 1.3 (2.9), n=10                       | 0 (0), n=7                      |
| Hallucinations                                                   | 0.3 (1.2), n=78   | 0.3 (1.2), n=71      | 0.7 (1.6), n=6  | 0        | 0.5 (2), n=21                   | 0.3 (0.8), n=43                     | 0 (0), n=6                      | 0             | 1.5 (3.7), n=6                      | 0.1 (0.4), n=7            | 0 (0), n=6                  | 0            |          | 0                     | 0.9 (1.6), n=7          | 0.2 (0.5), n=21              | 0 (0), n=5                    | 0.1 (0.3), n=10                       | 0 (0), n=6                      |
| Agitation                                                        | 2.9 (3.5), n=78   | 2.9 (3.4), n=71      | 2.8 (4.6), n=6  | 2        | 2.5 (3.3), n=21                 | 2.7 (3.4), n=42                     | 4.6 (4.1), n=7                  | 6             | 3.8 (4.6), n=6                      | 2.1 (2.3), n=7            | 1.2 (1.8), n=6              | 0            |          | 8                     | 1.3 (2.4), n=7          | 2.7 (3.5), n=21              | 4.8 (3), n=5                  | 2.7 (3.8), n=9                        | 4.6 (4.1), n=7                  |
| Depression                                                       | 1.3 (2.5), n=78   | 1.1* (2.3), n=72     | 4.2* (3.8), n=5 | 4        | 1.4 (2.8), n=20                 | 1 (2.1), n=44                       | 0.7 (1.5), n=7                  | 0             | 0.7 (1.6), n=6                      | 0.3 (0.8), n=6            | 3.7 (4.1), n=6 <sup>e</sup> | 0            |          | 0                     | 2.6 (3.8), n=7          | 0.2 (0.6), n=22 <sup>c</sup> | 0.6 (1.3), n=5                | 1.7 (2.6), n=10                       | 0.7 (1.5), n=7                  |
| Anxiety                                                          | 1.8 (2.9), n=78   | 1.7 (2.9), n=72      | 2.2 (3.5), n=5  | 6        | 0.9 (1.4), n=21 <sup>c</sup>    | 1.7 (2.9), n=43 <sup>c</sup>        | 5.1 (4.3), n=7 <sup>a,b</sup>   | 0             | 0.8 (1.6), n=6                      | 1.6 (1.7), n=7            | 0.3 (0.5), n=6              | 0            |          | 0                     | 3.1 (3.4), n=7          | 1.7 (2.8), n=21              | 0 (0), n=5                    | 1.3 (3), n=10                         | 5.1 (4.3), n=7                  |
| Euphoria                                                         | 1.6 (2.6), n=79   | 1.7 (2.6), n=72      | 0.7 (1.6), n=6  | 0        | 1.1 (2), n=20 <sup>c</sup>      | 1.6 (2.1), n=44 <sup>c</sup>        | 4.6 (4.9), n=7 <sup>a,b</sup>   | 0             | 1.2 (1.6), n=5                      | 1 (1.3), n=7              | 0 (0), n=6 <sup>h</sup>     | 0            |          | 8                     | 1.7 (1.9), n=7          | 2.1 (2.6), n=22              | 1 (1.7), n=5                  | 0.8 (1.2), n=10                       | 4.6 (4.9), n=7 <sup>c</sup>     |
| Apathy                                                           | 7.4 (3.8), n=76   | 7.7* (3.7), n=69     | 4.3* (4.1), n=6 | 6        | 8 (3.4), n=19 <sup>c</sup>      | 7 (3.5), n=42 <sup>c</sup>          | 12 (0), n=7 <sup>a,b</sup>      | 0             | 8.5 (3.3), n=6                      | 5.4 (4), n=5 <sup>h</sup> | 9.7 (2.7), n=6 <sup>i</sup> | 8            |          | 8                     | 6.6 (3.8), n=7          | 7.8 (2.8), n=21              | 2.8 (3.9), n=5 <sup>c,h</sup> | 7.6 (3.6), n=9                        | 12 (0), n=7 <sup>b,i</sup>      |
| Disinhibition                                                    | 4.8 (3.9), n=74   | 4.9 (4), n=68        | 3.6 (3), n=5    | 2        | 4.6 (4), n=18 <sup>c</sup>      | 4.2 (3.5), n=42 <sup>c</sup>        | 10 (3.8), n=7 <sup>a,b</sup>    | 4             | 4.7 (4.5), n=6                      | 5.2 (4.1), n=5            | 2.6 (2.6), n=5 <sup>i</sup> | 4            |          | 12                    | 4.4 (3), n=7            | 4 (3.6), n=22 <sup>h</sup>   | 3.8 (3.1), n=4                | 4.8 (4.1), n=9                        | 10 (3.8), n=7 <sup>c,e</sup>    |
| Irritability                                                     | 2.3 (3.2), n=77   | 1.9* (2.8), n=70     | 5.5* (5.9), n=6 | 6        | 1.8 (2.4), n=20                 | 1.8 (2.7), n=42                     | 2.9 (4.5), n=7                  | 4             | 2.2 (2.6), n=6                      | 2.3 (2.7), n=6            | 1 (2.4), n=6                | 0            |          | 2                     | 0.6 (1.5), n=7          | 2 (2.8), n=21                | 2.8 (3.9), n=5                | 1.8 (2.6), n=9                        | 2.9 (4.5), n=7                  |
| Aberrant Motor                                                   | 5.4 (4.6), n=73   | 5.7 (4.6), n=66      | 3.3 (4.5), n=6  | 0        | 4 (4.3), n=16 <sup>c</sup>      | 5.6 (4.3), n=42                     | 9.1 (5), n=7 <sup>a</sup>       | 12            | 5.6 (4.8), n=5                      | 1 (2), n=4                | 4.8 (4.6), n=5              | 0            |          | 8                     | 2 (3), n=7              | 6.2 (4.5), n=21              | 6.4 (4.8), n=5                | 6.7 (3.6), n=9                        | 9.1 (5), n=7                    |
| Sleep                                                            | 2.8               | 3 (3.6),             | 0.7 (1.6),      | 3        | 2.1                             | 2.5                                 | 8 (3.8),                        | 4             | 2 (2.5),                            | 3.2 (3),                  | 0.7                         | 0            |          | 8                     | 2.9 (4.5),              | 2.4 (3.2),                   | 1.8                           | 2.8 (3.2),                            | 8 (3.8),                        |

|                 | Primary diagnosis |                      |                |          | FTLD major molecular class |                              |                            |               | FTLD major molecular class subtypes |                |                         |              |          |                       |                         |                           |                |                          |                      |
|-----------------|-------------------|----------------------|----------------|----------|----------------------------|------------------------------|----------------------------|---------------|-------------------------------------|----------------|-------------------------|--------------|----------|-----------------------|-------------------------|---------------------------|----------------|--------------------------|----------------------|
|                 | All cases, n=100  | FTLD pathology, n=90 | AD, n=9        | ALS, n=1 | FTLD-Tau, n=29             | FTLD-TDP, n=52               | FTLD-FUS, n=8              | FTLD-UPS, n=1 | PiD, n=8                            | CBD, n=8       | PSP, n=8                | FTDP-17, n=3 | AGD, n=0 | Unclassified tau, n=2 | TDP-A, n=8 (1 with MND) | TDP-B, n=25 (19 with MND) | TDP-C, n=8     | TDP-U, n=11 (8 with MND) | aFTLD-U, n=8         |
|                 | (3.5), n=75       | n=68                 | n=6            |          | (2.8), n=19 <sup>c</sup>   | (3.2), n=41 <sup>c</sup>     | n=7 <sup>a,b</sup>         |               | n=6 <sup>h</sup>                    | n=5            | (1.6), n=6 <sup>h</sup> |              |          |                       | n=7                     | n=21 <sup>h</sup>         | (1.7), n=4     | n=9                      | n=7 <sup>a,c,e</sup> |
| Eating behavior | 6 (4.1), n=73     | 6.3 (4.1), n=66      | 3.7 (4.1), n=6 | 1        | 7.1 (3.4), n=18            | 5.5 (4.2), n=41 <sup>c</sup> | 10 (3.3), n=6 <sup>b</sup> | 6             | 7.7 (3.9), n=6                      | 6.8 (3.8), n=5 | 7.2 (3.6), n=5          | 8            |          | 4                     | 6 (4.4), n=6            | 6.4 (4.4), n=21           | 3.2 (4.4), n=5 | 4.1 (3), n=9             | 10 (3.3), n=6        |

Statistical analyses were conducted on groups with N≥4 for ANOVAs and N≥5 for Chi Square.

Unless otherwise specified, results are formatted as % with feature at first evaluation, % with feature at any point in disease course. Highlighting indicates a significant difference (p<.05) existed in ANOVA (continuous variables) or chi square (categorical variables) among the highlighted groups. Yellow indicates the significant difference existed at the time of first evaluation. Blue indicates the significant difference is present at any point in the disease course. Green indicates that the significant difference was present both at first evaluation and throughout disease course.

Comparison of primary diagnoses: Chi square or Fisher's exact test if expected cell count <5 for categorical variables, ANOVA with Bonferroni post-hoc, p<.05

\*=significant difference between FTLD and AD

Comparison of FTLD major molecular classes: Chi square for categorical variables, ANOVA with Bonferroni post-hoc, p<.05

1=significantly different from FTLD-Tau

2=significantly different from FTLD-TDP

3=significantly different from FTLD-FUS

Comparison of FTLD major molecular class subtypes: Chi square for categorical variables, ANOVA with Bonferroni post-hoc, p<.05

a=significantly different from Pick's

b=significantly different from CBD

c=significantly different from PSP

d=significantly different from TDP-A

e=significantly different from TDP-B

f=significantly different from TDP-C

g=significantly different from TDP-U

h=significantly different from aFTLD-U

AD – Alzheimer's disease, ALS – amyotrophic lateral sclerosis, aFTLD-U – atypical frontotemporal lobar degeneration with ubiquitin positive inclusions, AGD – argyrophilic grain disease, bvFTD – behavioral variant frontotemporal dementia, CBD – corticobasal degeneration, FTDP-17 – frontotemporal dementia and parkinsonism linked to chromosome 17, FTLD – frontotemporal lobar degeneration, FTLD-UPS – frontotemporal lobar degeneration with ubiquitin proteasome system positive inclusions, FUS – fused in sarcoma, MND – motor neuron disease, NPI – neuropsychiatric inventory, PiD – Pick's disease, PSP – progressive supranuclear palsy, TDP-43 – transactive response DNA binding protein 43 kDa, TDP-U – unclassifiable TDP-43



**Supplementary table 7 – Clinical features by pathological diagnosis among patients meeting FTDC probable bvFTD criteria**

|                                       | Primary diagnosis |                      |              |          | FTLD major molecular class |                           |                             |               | FTLD major molecular class subtypes |                           |                            |              |          |                       |                           |                           |                           |                           |                                       |
|---------------------------------------|-------------------|----------------------|--------------|----------|----------------------------|---------------------------|-----------------------------|---------------|-------------------------------------|---------------------------|----------------------------|--------------|----------|-----------------------|---------------------------|---------------------------|---------------------------|---------------------------|---------------------------------------|
|                                       | All cases, n=77   | FTLD pathology, n=70 | AD, n=7      | ALS, n=0 | FTLD-Tau, n=21             | FTLD-TDP, n=42            | FTLD-FUS, n=6               | FTLD-UPS, n=1 | PiD, n=8                            | CBD, n=5                  | PSP, n=4                   | FTDP-17, n=2 | AGD, n=0 | Unclassified tau, n=2 | TDP-A, n=5 (1 with MND)   | TDP-B, n=21 (16 with MND) | TDP-C, n=8                | TDP-U, n=11 (8 with MND)  | aFTLD-U, n=6                          |
| Male, n (%)                           | 55 (71.4)         | 50 (71.4)            | 5 (71.4)     |          | 17 (81.0)                  | 27 (64.3)                 | 5 (83.3)                    | 1 (100)       | 7 (87.5)                            | 3 (60.0)                  | 3 (75.0)                   | 2 (100)      |          | 2 (100)               | 4 (80.0)                  | 14 (66.7)                 | 4 (50.0)                  | 5 (62.5)                  | 5 (83.3)                              |
| Age of onset – mean (range)           | 54.8 (18-80)      | 54.2 (18-73)         | 60.3 (34-80) |          | 58.3 <sup>3</sup> (49-71)  | 54.6 <sup>7</sup> (18-73) | 38.2 <sup>1,2</sup> (26-48) | 51.0          | 58.0 <sup>h</sup> (49-71)           | 59.8 <sup>h</sup> (55-65) | 60.75 <sup>h</sup> (56-66) | 50.5 (50-51) |          | 58.5 (49-68)          | 53.4 (46-58)              | 54.0 <sup>h</sup> (18-73) | 58.5 <sup>h</sup> (44-71) | 53.1 <sup>h</sup> (42-66) | 38.2 <sup>a,b,c,e,f</sup> (26-48)     |
| Age at presentation – mean (range)    | 60.2 (29-83)      | 59.7 (29-78)         | 65.1 (43-83) |          | 63.8 <sup>3</sup> (53-73)  | 60.3 <sup>3</sup> (44-78) | 42.3 <sup>1,2</sup> (29-53) | 53.0          | 62.5 <sup>h</sup> (53-73)           | 64.6 <sup>h</sup> (60-68) | 67.0 <sup>h</sup> (58-71)  | 59.5 (59-60) |          | 65.0 (57-73)          | 57.2 <sup>h</sup> (49-63) | 60.4 <sup>h</sup> (44-78) | 63.5 <sup>h</sup> (52-75) | 58.5 <sup>h</sup> (50-70) | 42.3 <sup>a,b,c,d,e,f,g</sup> (29-53) |
| Age at death – mean (range)           | 63.8 (35-90)      | 63.1 (35-80)         | 70.0 (49-90) |          | 67.1 <sup>3</sup> (57-76)  | 63.9 <sup>3</sup> (47-80) | 45.7 <sup>1,2</sup> (35-56) | 55.0          | 66.3 <sup>h</sup> (57-74)           | 68.0 <sup>h</sup> (63-72) | 71.3 <sup>h</sup> (64-76)  | 61.0 (60-62) |          | 65.5 (58-73)          | 60.8 <sup>h</sup> (53-68) | 63.1 <sup>h</sup> (47-80) | 70.0 <sup>h</sup> (62-76) | 61.5 <sup>h</sup> (53-71) | 45.7 <sup>a,b,c,d,e,f,g</sup> (35-56) |
| <b>FTDC diagnostic criteria</b>       |                   |                      |              |          |                            |                           |                             |               |                                     |                           |                            |              |          |                       |                           |                           |                           |                           |                                       |
| <b>Early Disinhibition</b>            | 88, 96            | 90, 97               | 71, 86       |          | 90, 90                     | 88, 100                   | 100, 100                    | 100, 100      | 75, 75                              | 100, 100                  | 100, 100                   | 100, 100     |          | 100, 100              | 80, 100                   | 90, 100                   | 75, 100                   | 100, 100                  | 100, 100                              |
| Inappropriate                         | 65, 75            | 64, 74               | 71, 86       |          | 67, 71                     | 60, 71                    | 83, 100                     | 100, 100      | 63, 63                              | 80, 100                   | 50, 50                     | 100, 100     |          | 50, 50                | 80, 80                    | 62, 67                    | 63, 88                    | 38, 63                    | 83, 100                               |
| Loss of manners                       | 60, 70            | 61, 70               | 43, 71       |          | 67, 67                     | 55, 69                    | 83, 83                      | 100, 100      | 50, 50                              | 80, 80                    | 75, 75                     | 50, 50       |          | 100, 100              | 40, 80                    | 57, 67                    | 38, 63                    | 75, 75                    | 83, 83                                |
| Impulsive                             | 58, 68            | 61, 70               | 29, 43       |          | 57, 62                     | 57, 69                    | 100, 100                    | 100, 100      | 50, 50                              | 60, 60                    | 75, 100                    | 0, 0         |          | 100, 100              | 60, 80                    | 71, 81                    | 25, 38                    | 50, 63                    | 100, 100                              |
| <b>Early Apathy</b>                   | 81, 84            | 83, 86               | 57, 71       |          | 86, 86                     | 81, 86                    | 83, 83                      | 100, 100      | 88, 88                              | 100, 100                  | 100, 100                   | 50, 50       |          | 50, 50                | 100, 100                  | 86, 90                    | 50, 63                    | 88, 88                    | 83, 83                                |
| Apathy                                | 81, 87            | 83, 89               | 57, 71       |          | 86, 86                     | 81, 90                    | 83, 83                      | 100, 100      | 88, 88                              | 100, 100                  | 100, 100                   | 50, 50       |          | 50, 50                | 100, 100                  | 86, 95                    | 50, 75                    | 88, 88                    | 83, 83                                |
| Inertia                               | 18, 26            | 20, 27               | 0, 14        |          | 14, 19                     | 24, 29                    | 17, 33                      | 0, 100        | 13, 13                              | 20, 20                    | 25, 25                     | 0, 0         |          | 0, 50                 | 20, 40                    | 29, 33                    | 13, 13                    | 25, 25                    | 17, 33                                |
| <b>Early Loss of sympathy/empathy</b> | 58, 65            | 59, 66               | 57, 57       |          | 62, 67                     | 55, 64                    | 67, 67                      | 100, 100      | 88, 100                             | 40, 40                    | 50, 50                     | 50, 50       |          | 50, 50                | 40, 60                    | 48, 57                    | 88, 88                    | 50, 63                    | 67, 67                                |
| Lacking empathy                       | 43, 49            | 43, 49               | 43, 57       |          | 48, 52                     | 36, 43                    | 67, 67                      | 100, 100      | 50, 50                              | 40, 60                    | 50, 50                     | 50, 50       |          | 50, 50                | 20, 60                    | 24, 29                    | 63, 63                    | 50, 50                    | 67, 67                                |
| Lacking warmth                        | 45, 49            | 47, 51               | 29, 29       |          | 43, 48                     | 48, 52                    | 67, 67                      | 0, 0          | 75, 88                              | 20, 20                    | 0, 0                       | 50, 50       |          | 50, 50                | 40, 40                    | 38, 43                    | 75, 75                    | 50, 63                    | 67, 67                                |
| <b>Early Compulsive behavior</b>      | 73, 84            | 77*, 86              | 29*, 71      |          | 81, 95                     | 71, 79                    | 100, 100                    | 100, 100      | 88, 88                              | 80, 100                   | 50, 100                    | 100, 100     |          | 100, 100              | 80, 80                    | 62, 71                    | 88, 100                   | 75, 75                    | 100, 100                              |
| Simple repetitive behavior            | 27, 42            | 29, 43               | 14, 29       |          | 19, 43                     | 29, 40                    | 50, 50                      | 100, 100      | 13, 25                              | 0, 40                     | 50, 75                     | 0, 0         |          | 50, 100               | 60, 60                    | 19, 29                    | 25, 50                    | 38, 50                    | 50, 50                                |
| Complex compulsions                   | 66, 75            | 70*, 77              | 29*, 57      |          | 71, 86                     | 64, 69                    | 100, 100                    | 100, 100      | 75, 75                              | 80, 100                   | 25, 75                     | 100, 100     |          | 100, 100              | 80, 80                    | 57, 62                    | 88, 100                   | 50, 50                    | 100, 100                              |
| Stereotypic speech                    | 19, 26            | 21, 27               | 0, 14        |          | 19, 29                     | 19, 24                    | 50, 50                      | 0, 0          | 13, 38                              | 20, 20                    | 25, 25                     | 50, 50       |          | 0, 0                  | 20, 20                    | 24, 33                    | 13, 13                    | 13, 13                    | 50, 50                                |
| <b>Eating behavior</b>                | 82, 92            | 83, 93               | 71, 86       |          | 90, 100                    | 79, 90                    | 83, 83                      | 100, 100      | 88, 100                             | 100, 100                  | 75, 100                    | 100, 100     |          | 100, 100              | 80, 100                   | 86, 90                    | 63, 88                    | 75, 88                    | 83, 83                                |
| Change in food                        | 62, 77            | 64, 77               | 43, 71       |          | 67, 81                     | 62, 76                    | 67, 67                      | 100, 100      | 63, 75                              | 40, 80                    | 75, 100                    | 100, 100     |          | 100, 100              | 80, 100                   | 62, 71                    | 63, 88                    | 50, 63                    | 67, 67                                |

|                                                        | Primary diagnosis |                      |          |          | FTLD major molecular class |                   |               |               | FTLD major molecular class subtypes |          |          |              |          |                       |                         |                           |            |                          |              |
|--------------------------------------------------------|-------------------|----------------------|----------|----------|----------------------------|-------------------|---------------|---------------|-------------------------------------|----------|----------|--------------|----------|-----------------------|-------------------------|---------------------------|------------|--------------------------|--------------|
|                                                        | All cases, n=77   | FTLD pathology, n=70 | AD, n=7  | ALS, n=0 | FTLD-Tau, n=21             | FTLD-TDP, n=42    | FTLD-FUS, n=6 | FTLD-UPS, n=1 | PiD, n=8                            | CBD, n=5 | PSP, n=4 | FTDP-17, n=2 | AGD, n=0 | Unclassified tau, n=2 | TDP-A, n=5 (1 with MND) | TDP-B, n=21 (16 with MND) | TDP-C, n=8 | TDP-U, n=11 (8 with MND) | aFTLD-U, n=6 |
| preference                                             |                   |                      |          |          |                            |                   | 100           |               |                                     |          | 75       | 100          |          |                       |                         |                           |            |                          |              |
| Binge eating                                           | 60, 74            | 60, 74               | 57, 71   |          | 76, 90                     | 50, 67            | 67, 67        | 100, 100      | 88, 100                             | 100, 100 | 50, 75   | 50, 50       |          | 50, 100               | 40, 60                  | 52, 62                    | 38, 75     | 63, 75                   | 67, 67       |
| Oral exploration                                       | 6, 13             | 6, 11                | 14, 29   |          | 0, 10                      | 7, 10             | 17, 33        | 0, 0          | 0, 0                                | 0, 20    | 0, 25    | 0, 0         |          | 0, 0                  | 20, 20                  | 10, 10                    | 0, 13      | 0, 0                     | 17, 33       |
| <b>Neuropsych Pattern</b>                              | 30, 32            | 31, 32               | 29, 29   |          | 32, 32                     | 32, 35            | 20, 20        | 0, 0          | 38, 38                              | 20, 20   | 50, 50   | 0, 0         |          | 0, 0                  | 0, 0                    | 41, 47                    | 14, 14     | 50, 50                   | 20, 20       |
| Executive impairment                                   | 87, 91            | 86, 90               | 100, 100 |          | 95, 100                    | 81, 86            | 83, 83        | 100, 100      | 88, 100                             | 100, 100 | 100, 100 | 100, 100     |          | 100, 100              | 80, 100                 | 82, 88                    | 71, 71     | 88, 88                   | 83, 83       |
| Memory preserved                                       | 40, 40            | 41, 41               | 29, 29   |          | 42, 42                     | 43, 43            | 33, 33        | 0, 0          | 50, 50                              | 40, 40   | 50, 50   | 0, 0         |          | 0, 0                  | 0, 0                    | 47, 47                    | 29, 29     | 75, 75                   | 33, 33       |
| Visuospatial Preserved                                 | 79, 80            | 79, 81               | 71, 71   |          | 79, 79                     | 76, 79            | 100, 100      | 100, 100      | 88, 88                              | 60, 60   | 75, 75   | 100, 100     |          | 100, 100              | 80, 80                  | 72, 78                    | 86, 86     | 75, 75                   | 100, 100     |
| <b>Other cognitive, behavioral, and motor symptoms</b> |                   |                      |          |          |                            |                   |               |               |                                     |          |          |              |          |                       |                         |                           |            |                          |              |
| Memory                                                 | 32, 44            | 30, 41               | 57, 71   |          | 33, 48                     | 31, 43            | 0, 0          | 100, 100      | 25, 38                              | 60, 100  | 0, 0     | 50, 50       |          | 50, 50                | 60, 60                  | 33, 38                    | 13, 38     | 25, 50                   | 0, 0         |
| Language                                               | 36, 48            | 37, 47               | 29, 57   |          | 19, 29                     | 48, 60            | 17, 17        | 100, 100      | 13, 13                              | 20, 40   | 25, 25   | 0, 0         |          | 50, 100               | 40, 60                  | 43, 57                    | 88, 100    | 25, 25                   | 17, 17       |
| Executive (plan, organize, multitask, problem-solve)   | 75, 79            | 74, 79               | 86, 86   |          | 81, 81                     | 71, 79            | 67, 67        | 100, 100      | 88, 88                              | 80, 80   | 100, 100 | 50, 50       |          | 50, 50                | 100, 100                | 71, 81                    | 38, 50     | 88, 88                   | 67, 67       |
| Gets lost                                              | 9, 9              | 10, 10               | 0, 0     |          | 14, 14                     | 7, 7              | 0, 0          | 100, 100      | 13, 13                              | 20, 20   | 0, 0     | 50, 50       |          | 0, 0                  | 40, 40                  | 5, 5                      | 0, 0       | 0, 0                     | 0, 0         |
| Visual misperception                                   | 3, 4              | 3, 4                 | 0, 0     |          | 10, 14 <sup>b</sup>        | 0, 0 <sup>a</sup> | 0, 0          | 0, 0          | 13, 13                              | 0, 20    | 25, 25   | 0, 0         |          | 0, 0                  | 0, 0                    | 0, 0                      | 0, 0       | 0, 0                     | 0, 0         |
| Prosopagnosia                                          | 9, 13             | 10, 14               | 0, 0     |          | 14, 14                     | 7, 14             | 17, 17        | 0, 0          | 0, 0                                | 40, 40   | 0, 0     | 0, 0         |          | 50, 50                | 0, 0                    | 0, 5                      | 38, 63     | 0, 0                     | 17, 17       |
| Falls                                                  | 19, 31            | 21, 33               | 0, 14    |          | 14, 24                     | 24, 38            | 17, 17        | 100, 100      | 0, 0                                | 20, 40   | 50, 50   | 0, 0         |          | 0, 50                 | 40, 40                  | 33, 52                    | 0, 0       | 13, 38                   | 17, 17       |
| Dysphagia                                              | 31, 44            | 33, 47               | 14, 14   |          | 24, 43                     | 38, 50            | 33, 33        | 0, 100        | 13, 13                              | 40, 40   | 25, 100  | 50, 50       |          | 0, 50                 | 40, 80                  | 48, 57                    | 0, 0       | 50, 63                   | 33, 33       |
| Depression                                             | 26, 26            | 26, 26               | 29, 29   |          | 29, 29                     | 26, 26            | 17, 17        | 0, 0          | 25, 25                              | 60, 60   | 25, 25   | 0, 0         |          | 0, 0                  | 20, 20                  | 29, 29                    | 38, 38     | 13, 13                   | 17, 17       |
| Anxiety                                                | 29, 34            | 29, 33               | 29, 43   |          | 33, 33                     | 29, 36            | 0, 0          | 100, 100      | 38, 38                              | 60, 60   | 0, 0     | 50, 50       |          | 0, 0                  | 20, 20                  | 33, 43                    | 25, 38     | 25, 25                   | 0, 0         |
| Delusions                                              | 29, 36            | 30, 36               | 14, 43   |          | 19, 24                     | 38, 45            | 0, 0          | 100, 100      | 25, 25                              | 0, 20    | 0, 0     | 50, 50       |          | 50, 50                | 60, 80                  | 43, 43                    | 13, 25     | 38, 50                   | 0, 0         |
| Hallucinations                                         | 12, 17            | 13, 17               | 0, 14    |          | 10, 14                     | 17, 21            | 0, 0          | 0, 0          | 0, 0                                | 40, 60   | 0, 0     | 0, 0         |          | 0, 0                  | 20, 20                  | 24, 33                    | 0, 0       | 13, 13                   | 0, 0         |
| Mental rigidity                                        | 49, 64            | 54*, 67              | 0*, 29   |          | 57, 57                     | 50, 71            | 67, 67        | 100, 100      | 50, 50                              | 60, 60   | 50, 50   | 100, 100     |          | 50, 50                | 60, 80                  | 62, 81                    | 38, 75     | 25, 38                   | 67, 67       |
| Aggression                                             | 32, 44            | 36, 44               | 0, 43    |          | 43, 48                     | 31, 40            | 33, 50        | 100, 100      | 50, 50                              | 40, 60   | 50, 50   | 0, 0         |          | 50, 50                | 0, 40                   | 38, 43                    | 25, 25     | 38, 50                   | 33, 50       |
| Pseudobulbar affect                                    | 5, 12             | 6, 13                | 0, 0     |          | 0, 5                       | 10, 19            | 0, 0          | 0, 0          | 0, 0                                | 0, 20    | 0, 0     | 0, 0         |          | 0, 0                  | 0, 0                    | 19, 33                    | 0, 0       | 0, 13                    | 0, 0         |
| Hyperreligiosity                                       | 8, 10             | 9, 11                | 0, 0     |          | 5, 5                       | 10, 12            | 17, 17        | 0, 100        | 0, 0                                | 20, 20   | 0, 0     | 0, 0         |          | 0, 0                  | 0, 0                    | 10, 10                    | 13, 25     | 13, 13                   | 17, 17       |

|                                             | Primary diagnosis |                      |         |          | FTLD major molecular class      |                                   |               |               | FTLD major molecular class subtypes |          |          |              |          |                       |                                 |                                 |            |                          |              |
|---------------------------------------------|-------------------|----------------------|---------|----------|---------------------------------|-----------------------------------|---------------|---------------|-------------------------------------|----------|----------|--------------|----------|-----------------------|---------------------------------|---------------------------------|------------|--------------------------|--------------|
|                                             | All cases, n=77   | FTLD pathology, n=70 | AD, n=7 | ALS, n=0 | FTLD-Tau, n=21                  | FTLD-TDP, n=42                    | FTLD-FUS, n=6 | FTLD-UPS, n=1 | PiD, n=8                            | CBD, n=5 | PSP, n=4 | FTDP-17, n=2 | AGD, n=0 | Unclassified tau, n=2 | TDP-A, n=5 (1 with MND)         | TDP-B, n=21 (16 with MND)       | TDP-C, n=8 | TDP-U, n=11 (8 with MND) | aFTLD-U, n=6 |
| Criminal behavior                           | 19, 30            | 20, 30               | 14, 29  |          | 24, 29                          | 17, 31                            | 33, 33        | 0, 0          | 13, 25                              | 0, 0     | 50, 50   | 50, 50       |          | 50, 50                | 20, 60                          | 10, 19                          | 25, 50     | 25, 25                   | 33, 33       |
| Hypersexual                                 | 19, 21            | 19, 20               | 29, 29  |          | 19, 19                          | 19, 19                            | 17, 33        | 0, 0          | 13, 13                              | 40, 40   | 0, 0     | 0, 0         |          | 50, 50                | 20, 20                          | 24, 24                          | 0, 0       | 25, 25                   | 17, 33       |
| Hyposexual                                  | 12, 12            | 11, 11               | 14, 14  |          | 5, 5                            | 12, 12                            | 17, 17        | 100, 100      | 13, 13                              | 0, 0     | 0, 0     | 0, 0         |          | 0, 0                  | 0 <sup>c</sup> , 0 <sup>c</sup> | 0 <sup>c</sup> , 0 <sup>c</sup> | 50, 50     | 13, 13                   | 17, 17       |
| Increased drug/etoh use                     | 22, 23            | 23, 24               | 14, 14  |          | 19, 19                          | 21, 24                            | 50, 50        | 0, 0          | 38, 38                              | 0, 0     | 0, 0     | 50, 50       |          | 0, 0                  | 40, 40                          | 19, 19                          | 13, 25     | 25, 25                   | 50, 50       |
| Lacking insight                             | 91, 94            | 91, 93               | 86, 100 |          | 90, 90                          | 90, 93                            | 100, 100      | 100, 100      | 88, 88                              | 100, 100 | 75, 75   | 100, 100     |          | 100, 100              | 100, 100                        | 86, 90                          | 88, 88     | 100, 100                 | 100, 100     |
| <b>Neurological examination features</b>    |                   |                      |         |          |                                 |                                   |               |               |                                     |          |          |              |          |                       |                                 |                                 |            |                          |              |
| Dysarthria                                  | 18, 30            | 20, 33               | 0, 0    |          | 10, 19                          | 26, 40                            | 17, 17        | 0, 100        | 13, 13                              | 0, 0     | 25, 50   | 0, 0         |          | 0, 50                 | 0, 40                           | 33, 43                          | 13, 13     | 38, 63                   | 17, 17       |
| Saccadic eye movement – delayed initiation  | 14, 25            | 16, 27               | 0, 0    |          | 24, 29                          | 12, 24                            | 17, 33        | 0, 100        | 0, 0                                | 40, 40   | 25, 50   | 50, 50       |          | 50, 50                | 20, 20                          | 19, 38                          | 0, 0       | 0, 13                    | 17, 33       |
| Saccadic eye movement - slowed velocity     | 13, 21            | 14, 23               | 0, 0    |          | 19, 29                          | 12, 19                            | 17, 17        | 0, 100        | 0, 0                                | 0, 40    | 50, 50   | 50, 50       |          | 50, 50                | 20, 40                          | 19, 24                          | 0, 0       | 0, 13                    | 17, 17       |
| Saccadic eye movement – decreased amplitude | 6, 17             | 7, 17                | 0, 14   |          | 14, 24                          | 5, 14                             | 0, 0          | 0, 100        | 0, 0                                | 0, 40    | 50, 50   | 50, 50       |          | 0, 0                  | 0, 0                            | 10, 19                          | 0, 0       | 0, 25                    | 0, 0         |
| Rigidity – appendicular                     | 36, 53            | 37, 51               | 29, 71  |          | 43, 57                          | 36, 50                            | 17, 33        | 100, 100      | 25, 38                              | 60, 80   | 50, 75   | 50, 50       |          | 50, 50                | 80, 100                         | 38, 48                          | 0, 25      | 38, 50                   | 17, 33       |
| Rigidity – axial                            | 17, 31            | 19, 31               | 0, 29   |          | 24, 38                          | 17, 29                            | 17, 17        | 0, 100        | 0, 0                                | 40, 60   | 25, 75   | 50, 50       |          | 50, 50                | 20, 40                          | 19, 29                          | 0, 13      | 25, 38                   | 17, 17       |
| Tremor – rest                               | 5, 12             | 6, 11                | 0, 14   |          | 5, 10                           | 7, 12                             | 0, 0          | 0, 100        | 0, 0                                | 0, 20    | 25, 25   | 0, 0         |          | 0, 0                  | 20, 20                          | 10, 19                          | 0, 0       | 0, 0                     | 0, 0         |
| Tremor – action/postural                    | 27, 47            | 30, 46               | 0, 57   |          | 33, 52                          | 26, 43                            | 50, 50        | 0, 0          | 25, 38                              | 40, 80   | 25, 50   | 50, 50       |          | 50, 50                | 20, 40                          | 29, 48                          | 25, 38     | 25, 38                   | 50, 50       |
| Myoclonus                                   | 3, 5              | 3, 4                 | 0, 14   |          | 0, 0                            | 2, 5                              | 17, 17        | 0, 0          | 0, 0                                | 0, 0     | 0, 0     | 0, 0         |          | 0, 0                  | 0, 20                           | 5, 5                            | 0, 0       | 0, 0                     | 17, 17       |
| Dystonia                                    | 3, 6              | 3, 7                 | 0, 0    |          | 0, 10                           | 2, 5                              | 17, 17        | 0, 0          | 0, 0                                | 0, 40    | 0, 0     | 0, 0         |          | 0, 0                  | 0, 0                            | 0, 5                            | 0, 0       | 13, 13                   | 17, 17       |
| Bradykinesia                                | 29, 49            | 30, 49               | 14, 57  |          | 19, 43                          | 33, 50                            | 50, 50        | 0, 100        | 0, 0                                | 60, 80   | 25, 75   | 0, 50        |          | 0, 50                 | 60, 80                          | 33, 52                          | 13, 25     | 38, 50                   | 50, 50       |
| Apraxia                                     | 6, 19             | 7, 20                | 0, 14   |          | 5, 19                           | 10, 21                            | 0, 0          | 0, 100        | 0, 13                               | 20, 40   | 0, 25    | 0, 0         |          | 0, 0                  | 0, 0                            | 14, 29                          | 0, 13      | 13, 25                   | 0, 0         |
| Ataxia                                      | 6, 9              | 7, 10                | 0, 0    |          | 10, 14                          | 5, 7                              | 17, 17        | 0, 0          | 0, 0                                | 20, 20   | 25, 50   | 0, 0         |          | 0, 0                  | 20, 40                          | 5, 5                            | 0, 0       | 0, 0                     | 17, 17       |
| Decreased muscle power                      | 23, 29            | 26, 31               | 0, 0    |          | 10, 10 <sup>b</sup>             | 36, 45 <sup>a</sup>               | 0, 0          | 100, 100      | 13, 13                              | 20, 20   | 0, 0     | 0, 0         |          | 0, 0                  | 20, 40                          | 48, 57                          | 0, 0       | 50, 63                   | 0, 0         |
| Decreased muscle bulk                       | 22, 29            | 23, 30               | 14, 14  |          | 10, 10 <sup>b</sup>             | 31, 43 <sup>a</sup>               | 17, 17        | 0, 0          | 13, 13                              | 0, 0     | 0, 0     | 50, 50       |          | 0, 0                  | 20, 40                          | 43, 57                          | 0, 0       | 38, 50                   | 17, 17       |
| Fasciculations                              | 22, 29            | 24, 31               | 0, 0    |          | 5 <sup>b</sup> , 5 <sup>b</sup> | 36 <sup>a</sup> , 48 <sup>a</sup> | 0, 0          | 100, 100      | 0, 0                                | 0, 0     | 0, 0     | 50, 50       |          | 0, 0                  | 20, 20                          | 48, 62                          | 13, 13     | 38, 63                   | 0, 0         |
| Babinski                                    | 13, 25            | 14, 27               | 0, 0    |          | 10, 24                          | 19, 33                            | 0, 0          | 0, 0          | 13, 13                              | 0, 40    | 0, 25    | 50, 50       |          | 0, 0                  | 0, 40                           | 19, 33                          | 0, 0       | 50, 63                   | 0, 0         |

|                                                                  | Primary diagnosis |                      |                 |          | FTLD major molecular class   |                              |                               |               | FTLD major molecular class subtypes |                |                |              |          |                             |                              |                             |                             |                                        |                                 |
|------------------------------------------------------------------|-------------------|----------------------|-----------------|----------|------------------------------|------------------------------|-------------------------------|---------------|-------------------------------------|----------------|----------------|--------------|----------|-----------------------------|------------------------------|-----------------------------|-----------------------------|----------------------------------------|---------------------------------|
|                                                                  | All cases, n=77   | FTLD pathology, n=70 | AD, n=7         | ALS, n=0 | FTLD-Tau, n=21               | FTLD-TDP, n=42               | FTLD-FUS, n=6                 | FTLD-UPS, n=1 | PiD, n=8                            | CBD, n=5       | PSP, n=4       | FTDP-17, n=2 | AGD, n=0 | Unclassified tau, n=2       | TDP-A, n=5 (1 with MND)      | TDP-B, n=21 (16 with MND)   | TDP-C, n=8                  | TDP-U, n=11 (8 with MND)               | aFTLD-U, n=6                    |
| Brisk reflexes                                                   | 31, 43            | 33, 46               | 14, 14          |          | 19, 38                       | 45, 57                       | 0, 0                          | 0, 0          | 0 <sup>B</sup> , 0 <sup>B</sup>     | 40, 60         | 0, 50          | 100, 100     |          | 0, 50                       | 20, 40                       | 48, 62                      | 13, 13                      | 88 <sup>a,h</sup> , 100 <sup>a,h</sup> | 0 <sup>B</sup> , 0 <sup>B</sup> |
| Spasticity                                                       | 3, 8              | 3, 9                 | 0, 0            |          | 0, 0                         | 5, 12                        | 0, 0                          | 0, 100        | 0, 0                                | 0, 0           | 0, 0           |              | 0, 0     | 0, 0                        | 0, 5                         | 0, 0                        | 0, 0                        | 25, 50                                 | 0, 0                            |
| Abnormal gait                                                    | 19, 32            | 20, 33               | 14, 29          |          | 19, 33                       | 24, 38                       | 0, 0                          | 0, 0          | 13, 13                              | 40, 60         | 0, 50          | 0, 0         |          | 50, 50                      | 20, 40                       | 29, 43                      | 13, 13                      | 25, 50                                 | 0, 0                            |
| Retropulsion                                                     | 9, 16             | 10, 17               | 0, 0            |          | 14, 19                       | 10, 17                       | 0, 0                          | 0, 100        | 0, 0                                | 20, 20         | 50, 50         | 0, 0         |          | 0, 50                       | 0, 0                         | 14, 24                      | 0, 0                        | 13, 25                                 | 0, 0                            |
| <b>NPI Frequency x severity scores (max of 12), mean (SD), n</b> |                   |                      |                 |          |                              |                              |                               |               |                                     |                |                |              |          |                             |                              |                             |                             |                                        |                                 |
| Delusions                                                        | 1.5 (3.1), n=62   | 1.3 (2.9), n=58      | 3.3 (5.9), n=4  |          | 0.1 (0.5), n=16              | 1.9 (3.4), n=36              | 0 (0), n=5                    | 6             | 0 (0), n=6                          | 0.4 (0.9), n=5 | 0 (0), n=3     | 0            |          | 0                           | 3.2 (3.3), n=5               | 2.2 (3.9), n=19             | 0.2 (0.4), n=5              | 1.7 (3.4), n=7                         | 0 (0), n=5                      |
| Hallucinations                                                   | 0.3 (1.3), n=62   | 0.4 (1.3), n=58      | 0 (0), n=4      |          | 0.6 (2.2), n=16              | 0.3 (0.8), n=36              | 0 (0), n=5                    | 0             | 1.5 (3.7), n=6                      | 0.2 (0.4), n=5 | 0 (0), n=3     | 0            |          | 0                           | 1.2 (1.8), n=5               | 0.2 (0.5), n=19             | 0 (0), n=5                  | 0.1 (0.4), n=7                         | 0 (0), n=5                      |
| Agitation                                                        | 3.1 (3.7), n=61   | 3.1 (3.6), n=57      | 3.3 (5.9), n=4  |          | 2.9 (3.6), n=16              | 2.7 (3.5), n=35              | 5.6 (4.3), n=5                | 6             | 3.8 (4.6), n=6                      | 1.6 (2.6), n=5 | 2.3 (2.1), n=3 | 0            | 8        | 0.6 (1.3), n=5              | 2.5 (3.5), n=19              | 4.8 (3), n=5                | 3.3 (4.5), n=6              | 5.6 (4.3), n=5                         |                                 |
| Depression                                                       | 1 (2.3), n=60     | 0.9 (2.2), n=57      | 3 (4.4), n=3    |          | 0.8 (2.2), n=15              | 0.9 (2.3), n=36              | 0.8 (1.8), n=5                | 0             | 0.7 (1.6), n=6                      | 0 (0), n=4     | 2.7 (4.6), n=3 | 0            | 0        | 3.2 (4.4), n=5              | 0.2 (0.5), n=19              | 0.6 (1.3), n=5              | 1.7 (2.9), n=7              | 0.8 (1.8), n=5                         |                                 |
| Anxiety                                                          | 1.6 (2.8), n=61   | 1.6 (2.7), n=58      | 2.7 (4.6), n=3  |          | 0.8 (1.5), n=16              | 1.6 (3), n=36                | 3.6 (3.6), n=5                | 0             | 0.8 (1.6), n=6                      | 1.4 (1.9), n=5 | 0.3 (0.6), n=3 | 0            | 0        | 3.2 (3.6), n=5              | 1.8 (3), n=19                | 0 (0), n=5                  | 1.3 (3.4), n=7              | 3.6 (3.6), n=5                         |                                 |
| Euphoria                                                         | 1.8 (2.8), n=61   | 1.8 (2.8), n=57      | 1 (2), n=4      |          | 1.3 <sup>c</sup> (2.3), n=15 | 1.6 <sup>c</sup> (2.2), n=36 | 5.6 <sup>a,b</sup> (5.4), n=5 | 0             | 1.2 (1.6), n=5                      | 1 (1.4), n=5   | 0 (0), n=3     | 0            | 8        | 1.4 (1.9), n=5              | 2.3 (2.7), n=19              | 1 (1.7), n=5                | 0.4 <sup>h</sup> (0.5), n=7 | 5.6 <sup>B</sup> (5.4), n=5            |                                 |
| Apathy                                                           | 7.2 (4), n=59     | 7.6* (3.9), n=55     | 2.5* (3.8), n=4 |          | 8 (3.2), n=14                | 7 <sup>c</sup> (3.8), n=35   | 12 <sup>b</sup> (0), n=5      | 0             | 8.5 (3.3), n=6                      | 6.3 (4.9), n=3 | 8.7 (3.1), n=3 | 8            | 8        | 7.2 (4.4), n=5              | 7.8 (3), n=19                | 2.8 <sup>h</sup> (3.9), n=5 | 7.7 (4.5), n=6              | 12 <sup>f</sup> (0), n=5               |                                 |
| Disinhibition                                                    | 5.3 (4.1), n=57   | 5.4 (4.2), n=54      | 2.7 (2.3), n=3  |          | 5.5 <sup>c</sup> (4), n=14   | 4.4 <sup>c</sup> (3.7), n=34 | 12 <sup>a,b</sup> (0), n=5    | 4             | 4.7 <sup>h</sup> (4.5), n=6         | 8 (1.7), n=3   | 3 (3), n=3     | 4            | 12       | 4.2 <sup>h</sup> (3.6), n=5 | 4.4 <sup>h</sup> (3.7), n=19 | 3.8 <sup>h</sup> (3.1), n=4 | 5.2 (4.9), n=6              | 12 <sup>a,d,e,f</sup> (0), n=5         |                                 |
| Irritability                                                     | 2.1 (3.1), n=60   | 2 (2.9), n=56        | 3.3 (5.9), n=4  |          | 1.7 (2.3), n=15              | 1.9 (2.8), n=35              | 3.2 (5.2), n=5                | 4             | 2.2 (2.6), n=6                      | 2.5 (3), n=4   | 0 (0), n=3     | 0            | 2        | 0 (0), n=5                  | 1.9 (2.8), n=19              | 2.8 (3.9), n=5              | 2.7 (2.8), n=6              | 3.2 (5.2), n=5                         |                                 |
| Aberrant Motor                                                   | 5.9 (4.6), n=58   | 6.3* (4.6), n=54     | 1 *(1.2), n=4   |          | 4.5 <sup>c</sup> (4.4), n=13 | 6 <sup>c</sup> (4.3), n=35   | 12 <sup>a,b</sup> (0), n=5    | 12            | 5.6 (4.8), n=5                      | 1.3 (2.3), n=3 | 6 (5.3), n=3   | 0            | 8        | 2.4 <sup>h</sup> (3.6), n=5 | 6.3 (4.3), n=19              | 6.4 (4.8), n=5              | 7.7 (3.9), n=6              | 12 <sup>d</sup> (0), n=5               |                                 |
| Sleep                                                            | 2.9 (3.5), n=59   | 3.1 (3.5), n=55      | 0 (0), n=4      |          | 2.4 (2.9), n=15c             | 2.6 (3.3), n=34c             | 8 (3.7), n=5ab                | 4             | 2 (2.5), n=6                        | 4 (2.8), n=4   | 0 (0), n=3     | 0            | 8        | 4 (4.9), n=5                | 2.7 <sup>h</sup> (3.3), n=19 | 1.8 (1.7), n=4              | 2 (3.1), n=6                | 8 <sup>e</sup> (3.7), n=5              |                                 |
| Eating behavior                                                  | 6.5 (4.1), n=58   | 6.6 (4.1), n=54      | 5.5 (3.8), n=4  |          | 7.9 (2.9), n=15              | 5.5 (4.4), n=34c             | 11 (2), n=4b                  | 6             | 7.7 (3.9), n=6                      | 8.5 (0.6), n=4 | 8.7 (3.1), n=3 | 8            | 4        | 5.8 (5.3), n=4              | 6.7 (4.4), n=19              | 3.2 (4.4), n=5              | 3.3 (3.1), n=6              | 11 (2), n=4                            |                                 |

Statistical analyses were conducted on groups with N $\geq$ 4 for ANOVAs and N $\geq$ 5 for Chi Square.

Unless otherwise specified, results are formatted as % with feature at first evaluation, % with feature at any point in disease course. Highlighting indicates a significant difference (p<.05) existed in ANOVA (continuous variables) or chi square (categorical variables) among the highlighted groups. Yellow indicates the significant difference existed at the time of first evaluation. Blue indicates the significant difference is present at any point in the disease course. Green indicates that the significant difference was present both at first evaluation and throughout disease course.

Comparison of primary diagnoses: Chi square or Fishers exact test if expected cell count <5 for categorical variables, ANOVA with Bonferroni post-hoc, p<.05

\*=significant difference between FTLD and AD

Comparison of FTLD major molecular classes: Chi square for categorical variables, ANOVA with Bonferroni post-hoc, p<.05

1=significantly different from FTLD-Tau

2=significantly different from FTLD-TDP

3=significantly different from FTLD-FUS

Comparison of FTLD major molecular class subtypes: Chi square for categorical variables, ANOVA with Bonferroni post-hoc, p<.05

a=significantly different from Picks

b=significantly different from CBD

c=significantly different from PSP

d=significantly different from TDP-A

e=significantly different from TDP-B

f=significantly different from TDP-C

g=significantly different from TDP-U

h=significantly different from aFTLD-U

AD – Alzheimer’s disease, ALS – amyotrophic lateral sclerosis, aFTLD-U – atypical frontotemporal lobar degeneration with ubiquitin positive inclusions, AGD – argyrophilic grain disease, bvFTD – behavioral variant frontotemporal dementia, CBD – corticobasal degeneration, FTDP-17 – frontotemporal dementia and parkinsonism linked to chromosome 17, FTLD – frontotemporal lobar degeneration, FTLD-UPS – frontotemporal lobar degeneration with ubiquitin proteasome system positive inclusions, FUS – fused in sarcoma, MND – motor neuron disease, NPI – neuropsychiatric inventory, PiD – Picks disease, PSP – progressive supranuclear palsy, TDP-43 – transactive response DNA binding protein 43 kDA, TDP-U – unclassifiable TDP-43

**Supplementary Table 8 – First symptoms by pathological diagnosis**

|                                | Disinhibition | Executive impairment | Motor changes | Obsessive-compulsive behavior | Mental rigidity | Apathy  | Loss of sympathy /empathy | Irritability | Psychosis | Language changes | Memory loss | Anxiety | Drug or alcohol use | Other   |
|--------------------------------|---------------|----------------------|---------------|-------------------------------|-----------------|---------|---------------------------|--------------|-----------|------------------|-------------|---------|---------------------|---------|
| <b>Total, n=117</b>            | 10 (9)        | 8 (7)                | 5 (4)         | 2 (2)                         | 3 (3)           | 22 (19) | 15 (13)                   | 6 (5)        | 4 (3)     | 12 (10)          | 10 (9)      | 4 (3)   | 4 (3)               | 12 (10) |
| <b>FTLD, n=98</b>              | 9 (9)         | 5 (5)                | 4 (4)         | 2 (2)                         | 3 (3)           | 20 (20) | 14 (14)                   | 6 (6)        | 3 (3)     | 9 (9)            | 7 (7)       | 3 (3)   | 4 (4)               | 9 (9)   |
| <b>FTLD-Tau, n=34</b>          | 4 (12)        | 0                    | 2 (6)         | 0                             | 1 (3)           | 6 (18)  | 4 (12)                    | 5 (15)       | 0         | 3 (9)            | 3 (9)       | 1 (3)   | 0                   | 4 (12)  |
| <b>CBD, n=10</b>               | 1 (10)        | 0                    | 0             | 0                             | 0               | 2 (20)  | 1 (10)                    | 2 (20)       | 0         | 1 (10)           | 1 (10)      | 1 (10)  | 0                   | 1 (10)  |
| <b>PSP, N=9</b>                | 1 (11)        | 0                    | 2 (22)        | 0                             | 0               | 1 (11)  | 1 (11)                    | 2 (22)       | 0         | 1 (11)           | 1 (11)      | 0       | 0                   | 0       |
| <b>PiD, n=8</b>                | 1 (13)        | 0                    | 0             | 0                             | 0               | 4 (50)  | 1 (13)                    | 1 (13)       | 0         | 0                | 0           | 0       | 0                   | 1 (13)  |
| <b>FTDP17, n=3</b>             | 0             | 0                    | 0             | 0                             | 1 (33)          | 0       | 0                         | 0            | 0         | 0                | 1 (33)      | 0       | 0                   | 1 (33)  |
| <b>AGD, n=1</b>                | 1 (100)       | 0                    | 0             | 0                             | 0               | 0       | 0                         | 0            | 0         | 0                | 0           | 0       | 0                   | 0       |
| <b>Unclassifiable Tau, n=3</b> | 0             | 0                    | 0             | 0                             | 0               | 0       | 1 (33)                    | 0            | 0         | 1 (33)           | 0           | 0       | 0                   | 1 (33)  |
| <b>FTLD-TDP, n=55</b>          | 4 (7)         | 5 (9)                | 2 (4)         | 2 (4)                         | 2 (4)           | 12 (22) | 6 (11)                    | 1 (2)        | 3 (5)     | 5 (9)            | 4 (7)       | 2 (4)   | 3 (5)               | 4 (7)   |
| <b>TDP-A, n=9</b>              | 1 (11)        | 2 (22)               | 0             | 1 (11)                        | 1 (11)          | 2 (22)  | 0                         | 0            | 0         | 0                | 0           | 0       | 2 (22)              | 0       |
| <b>TDP-B, n=27</b>             | 3 (11)        | 3 (11)               | 2 (7)         | 1 (4)                         | 1 (4)           | 6 (22)  | 1 (4)                     | 1 (4)        | 2 (7)     | 2 (7)            | 1 (4)       | 0       | 1 (4)               | 3 (11)  |
| <b>TDP-C, n=8</b>              | 0             | 0                    | 0             | 0                             | 0               | 0       | 4 (50)                    | 0            | 0         | 3 (38)           | 1 (13)      | 0       | 0                   | 0       |
| <b>TDP-U, n=11</b>             | 0             | 0                    | 0             | 0                             | 0               | 4 (36)  | 1 (9)                     | 0            | 1 (9)     | 0                | 2 (18)      | 2 (18)  | 0                   | 1 (9)   |
| <b>FTLD_FUS (aFTLDU), n=8</b>  | 1 (13)        | 0                    | 0             | 0                             | 0               | 1 (13)  | 3 (38)                    | 0            | 0         | 1 (13)           | 0           | 0       | 1 (13)              | 1 (13)  |
| <b>FTLD-U, n=1</b>             | 0             | 0                    | 0             | 0                             | 0               | 0       | 1 (100)                   | 0            | 0         | 0                | 0           | 0       | 0                   | 0       |
| <b>AD, n=15</b>                | 1 (7)         | 3 (20)               | 0             | 0                             | 0               | 2 (13)  | 1 (7)                     | 0            | 1 (7)     | 3 (20)           | 2 (13)      | 0       | 0                   | 2 (13)  |
| <b>ALS, n=4</b>                | 0             | 0                    | 1 (25)        | 0                             | 0               | 0       | 0                         | 0            | 0         | 0                | 1 (25)      | 1 (25)  | 0                   | 1 (25)  |

All reported as n (%). AD – Alzheimer’s disease, ALS – amyotrophic lateral sclerosis, aFTLD-U – atypical frontotemporal lobar degeneration with ubiquitin positive inclusions, AGD – argyrophilic grain disease, CBD – corticobasal degeneration, FTDP-17 – frontotemporal dementia and parkinsonism linked to chromosome 17, FTLD – frontotemporal lobar degeneration, FTLD-U – frontotemporal lobar degeneration with ubiquitin positive inclusions, FUS – fused in sarcoma, PiD – Pick’s disease, PSP – progressive supranuclear palsy, TDP-43 – transactive response DNA binding protein 43 kDA, TDP-U – unclassifiable TDP-43

**Supplementary Table 9 – Neuropsychological testing results by pathological diagnosis**

|                            | Primary diagnosis |                           |      |              | FTLD major molecular class |                         |          |                         |          |                           |     |             | FTLD major molecular class subtypes |                         |     |                          |         |       |                  |       |       |                          |       |                          |       |                            |       |                                  |         |                          |
|----------------------------|-------------------|---------------------------|------|--------------|----------------------------|-------------------------|----------|-------------------------|----------|---------------------------|-----|-------------|-------------------------------------|-------------------------|-----|--------------------------|---------|-------|------------------|-------|-------|--------------------------|-------|--------------------------|-------|----------------------------|-------|----------------------------------|---------|--------------------------|
|                            | AD                |                           | FTLD |              | FTLD-tau                   |                         | FTLD-TDP |                         | FTLD-FUS |                           | PID |             | CBD                                 |                         | PSP |                          | FTDP-17 |       | Unclassified tau |       | TDP-A |                          | TDP-B |                          | TDP-C |                            | TDP-U |                                  | aFTLD-U |                          |
|                            | N                 | M(SD)                     | N    | M(SD)        | N                          | M(SD)                   | N        | M(SD)                   | N        | M(SD)                     | N   | M(SD)       | N                                   | M(SD)                   | N   | M(SD)                    | N       | M(SD) | N                | M(SD) | N     | M(SD)                    | N     | M(SD)                    | N     | M(SD)                      | N     | M(SD)                            | N       | M(SD)                    |
| Age                        | 12                | 66.2 (11.4)               | 57   | 61.4 (8.0)   | 19                         | 62.9 (6.8) <sup>3</sup> | 34       | 62.0 (7.9) <sup>3</sup> | 4        | 48.8 (4.5) <sup>1,2</sup> | 3   | 61.7 (10.2) | 8                                   | 64.0 (7.6) <sup>h</sup> | 6   | 63.7 (5.5)               | 1       | 59.7  | 1                | 57.2  | 6     | 62.6 (6.1)               | 17    | 61.9 (8.5)               | 5     | 64.4 (8.7)                 | 6     | 59.5 (8.2)                       | 4       | 48.8 (4.5) <sup>b</sup>  |
| %male                      | 12                | 76%                       | 57   | 77%          | 19                         | 84%                     | 34       | 74%                     | 4        | 75%                       | 3   | 100%        | 8                                   | 75%                     | 6   | 83%                      | 1       | 100%  | 1                | 100%  | 6     | 67%                      | 17    | 71%                      | 5     | 80%                        | 6     | 83%                              | 4       | 75%                      |
| CDR - Total                | 10                | 0.9 (0.2)                 | 48   | 1.0 (0.6)    | 17                         | 0.9 (0.5)               | 28       | 1.0 (0.6)               | 3        | 1.7 (0.6)                 | 3   | 0.8 (0.3)   | 7                                   | 0.9 (0.5)               | 5   | 0.5 (0.4)                | 1       | 1     | 1                | 2     | 6     | 1.0 (0.5)                | 15    | 1.1 (0.7)                | 3     | 1.2 (0.8)                  | 4     | 0.8 (0.3)                        | 3       | 1.7 (0.6)                |
| CDR – sum of boxes         | 10                | 4.9 (1.3)                 | 48   | 5.5 (3.2)    | 17                         | 5.4 (3.3)               | 28       | 5.4 (3.2)               | 3        | 7.8 (2.1)                 | 3   | 5.5 (3.6)   | 7                                   | 5.7 (3.3)               | 5   | 3.8 (3.2)                | 1       | 4.5   | 1                | 11    | 6     | 6.1 (4.3)                | 15    | 5.4 (3.2)                | 3     | 6.2 (1.8)                  | 4     | 3.8 (2.0)                        | 3       | 7.8 (2.1)                |
| MMSE                       | 12                | 19.8 (6.9)                | 57   | 25.1 (4.1)*  | 19                         | 25.4 (4.5)              | 34       | 24.8 (3.9)              | 4        | 25.5 (5.1)                | 3   | 27.7 (1.2)  | 8                                   | 23.8 (6.3)              | 6   | 27.0 (2.1)               |         | 26    | 1                | 22    | 6     | 23.3 (4.5)               | 17    | 24.4 (4.3)               | 5     | 26.0 (2.8)                 | 6     | 26.7 (2.7)                       | 4       | 25.5 (5.1)               |
| <b>Executive function</b>  |                   |                           |      |              |                            |                         |          |                         |          |                           |     |             |                                     |                         |     |                          |         |       |                  |       |       |                          |       |                          |       |                            |       |                                  |         |                          |
| Trailmaking                | 12                | 116.2 (13.3) <sup>+</sup> | 54   | 84.7 (40.9)* | 19                         | 100.5 (33.3)            | 32       | 77.0 (42.7)             | 3        | 67.0 (47.8)               | 3   | 95.3 (42.7) | 8                                   | 118.8 (2.8)             | 6   | 79.8 (44.5)              | 1       | 75    | 1                | 120   | 6     | 81.5 (44.2)              | 15    | 84.1 (40.2)              | 5     | 81.0 (48.5)                | 6     | 51.0 (44.3)                      | 3       | 67.0 (47.8)              |
| Stroop                     | 12                | 9.2 (7.3) <sup>+</sup>    | 49   | 25.8 (18.6)* | 15                         | 20.1 (11.4)             | 30       | 29.0 (20.8)             | 4        | 23.5 (22.1)               | 2   | 30.5 (20.5) | 7                                   | 17.4 (8.5) <sup>g</sup> | 5   | 18.4 (12.9) <sup>g</sup> | 1       | 26    | 0                |       | 5     | 21.0 (10.6) <sup>g</sup> | 16    | 21.6 (14.9) <sup>g</sup> | 4     | 30.8 (11.2)                | 5     | 59.4 (25.2) <sup>b,c,d,e,h</sup> | 4       | 23.5 (22.1) <sup>g</sup> |
| Design Fluency Correct     | 11                | 2.7 (1.7) <sup>+</sup>    | 53   | 5.6 (3.7)*   | 17                         | 4.5 (2.7)               | 32       | 6.4 (4.1)               | 4        | 3.3 (1.7)                 | 3   | 5.3 (0.6)   | 7                                   | 3.0 (2.2)               | 5   | 4.4 (2.7)                | 1       | 10    | 1                | 8     | 5     | 5.6 (4.7)                | 17    | 6.1 (4.0)                | 4     | 9.0 (5.7)                  | 6     | 6.3 (3.1)                        | 4       | 3.3 (1.7)                |
| D-word Fluency             | 12                | 6.3 (3.7)                 | 57   | 5.9 (3.5)    | 19                         | 5.6 (3.5)               | 34       | 6.1 (3.4)               | 4        | 6.0 (5.5)                 | 3   | 8.7 (3.2)   | 8                                   | 5.1 (3.6)               | 6   | 4.7 (3.3)                | 1       | 9     | 1                | 2     | 6     | 5.3 (2.8)                | 17    | 5.2 (3.4)                | 5     | 8.2 (1.1)                  | 6     | 7.7 (4.3)                        | 4       | 6.0 (5.5)                |
| Design Fluency repetitions | 11                | 0.1 (0.3) <sup>+</sup>    | 53   | 4.0 (4.2)*   | 17                         | 3.8 (4.6)               | 32       | 3.5 (3.4) <sup>3</sup>  | 4        | 9.0 (6.4) <sup>2</sup>    | 3   | 4.7 (8.1)   | 7                                   | 5.0 (5.2)               | 5   | 2.6 (1.8)                | 1       | 1     | 1                | 1     | 5     | 2.2 (1.9)                | 17    | 4.6 (3.2)                | 4     | 0.8 (0.5)                  | 6     | 3.5 (4.6)                        | 4       | 9.0 (6.4)                |
| Rule violations            | 9                 | 12.7 (12.1)               | 38   | 7.3 (7.9)    | 11                         | 7.9 (5.7)               | 25       | 7.2 (8.9)               | 2        | 5.5 (7.8)                 | 2   | 8.0 (5.7)   | 5                                   | 7.8 (3.0)               | 3   | 10.7 (9.3)               | 1       | 0     | 0                |       | 4     | 9.3 (11.6)               | 14    | 8.4 (9.9)                | 2     | 1.5 (2.1)                  | 5     | 4.2 (4.5)                        | 2       | 5.5 (7.8)                |
| <b>Memory</b>              |                   |                           |      |              |                            |                         |          |                         |          |                           |     |             |                                     |                         |     |                          |         |       |                  |       |       |                          |       |                          |       |                            |       |                                  |         |                          |
| CVLT-SF LDFR               | 12                | 1.8 (2.7)                 | 57   | 3.4 (2.2)    | 19                         | 3.3 (2.1)               | 34       | 3.8 (2.2) <sup>3</sup>  | 4        | 0.8 (1.0) <sup>2</sup>    | 3   | 5.3 (0.6)   | 8                                   | 2.5 (1.9)               | 6   | 4.2 (1.6)                | 1       | 1     | 1                | 0     | 6     | 3.2 (2.3)                | 17    | 3.9 (2.1)                | 5     | 4.0 (3.2)                  | 6     | 4.0 (2.0)                        | 4       | 0.8 (1.0)                |
| CVLT-SF d-prime            | 12                | 1.6 (1.7)                 | 57   | 2.1 (1.1)    | 19                         | 2.1 (1.0)               | 34       | 2.1 (1.1)               | 4        | 1.4 (1.3)                 | 3   | 2.0 (1.8)   | 8                                   | 2.0 (1.1)               | 6   | 2.3 (0.8)                | 1       | 2.6   | 1                | 1.5   | 6     | 1.8 (0.6)                | 17    | 2.2 (1.1)                | 5     | 1.4 (1.3)                  | 6     | 2.7 (0.9)                        | 4       | 1.4 (1.3)                |
| Benson Delay               | 12                | 4.5 (3.2) <sup>+</sup>    | 57   | 7.5 (4.3)*   | 19                         | 7.2 (4.7)               | 34       | 8.2 (4.0)               | 4        | 3.0 (2.9)                 | 3   | 9.3 (4.7)   | 8                                   | 6.8 (4.3)               | 6   | 8.5 (5.2)                | 1       | 2     | 1                | 2     | 6     | 6.5 (3.6)                | 17    | 8.8 (3.8)                | 5     | 5.0 (3.7)                  | 6     | 10.7 (4.0)                       | 4       | 3.0 (2.9)                |
| <b>Visuospatial</b>        |                   |                           |      |              |                            |                         |          |                         |          |                           |     |             |                                     |                         |     |                          |         |       |                  |       |       |                          |       |                          |       |                            |       |                                  |         |                          |
| Benson Copy                | 12                | 11.1 (5.4)                | 57   | 13.9 (2.9)   | 19                         | 14.0 (2.0)              | 34       | 14.0 (2.9)              | 4        | 12.8 (6.6)                | 3   | 15.3 (1.2)  | 8                                   | 14.0 (2.3)              | 6   | 12.7 (1.8)               | 1       | 16    | 1                | 15    | 6     | 14.3 (2.1)               | 17    | 13.9 (2.6)               | 5     | 12.6 (4.5)                 | 6     | 14.8 (3.1)                       | 4       | 12.8 (6.6)               |
| <b>Language</b>            |                   |                           |      |              |                            |                         |          |                         |          |                           |     |             |                                     |                         |     |                          |         |       |                  |       |       |                          |       |                          |       |                            |       |                                  |         |                          |
| PPVT                       | 4                 | 14.5 (1.3)                | 35   | 13.3 (2.2)   | 11                         | 13.7 (2.2)              | 22       | 13.0 (2.2)              | 2        | 15.0 (1.4)                | 2   | 15.5 (0.7)  | 4                                   | 14.0 (1.4)              | 3   | 14.0 (2.6)               | 1       | 13    | 1                | 9     | 4     | 11.8 (2.9)               | 12    | 12.4 (1.8)               | 0     |                            | 6     | 15.0 (1.1)                       | 2       | 15.0 (1.4)               |
| Naming                     | 12                | 9.8 (4.3)                 | 56   | 11.6 (3.6)   | 18                         | 11.8 (4.3)              | 34       | 11.2 (3.4)              | 4        | 13.5 (2.4)                | 3   | 15.0 (0.0)  | 7                                   | 10.1 (4.3)              | 6   | 14.3 (1.2) <sup>f</sup>  | 1       | 9     | 1                | 2     | 6     | 12.0 (2.1)               | 17    | 11.5 (2.9)               | 5     | 6.8 (4.3) <sup>c,g,h</sup> | 6     | 13.2 (1.7) <sup>f</sup>          | 4       | 13.5 (2.4) <sup>f</sup>  |
| Repetition                 | 11                | 2.0 (1.2) <sup>+</sup>    | 57   | 2.7 (0.6)*   | 19                         | 2.7 (0.6)               | 34       | 2.7 (0.6)               | 4        | 3.0 (0.0)                 | 3   | 2.7 (0.6)   | 8                                   | 2.8 (0.5)               | 3   | 2.7 (0.6)                | 1       | 3     | 1                | 1     | 6     | 2.8 (0.4)                | 17    | 2.8 (0.4)                | 5     | 2.4 (0.9)                  | 6     | 2.5 (0.8)                        | 4       | 3.0 (0.0)                |
| Verbal Agility             | 3                 | 4.0 (2.0)                 | 29   | 4.3 (1.3)    | 9                          | 5.1 (0.9)               | 19       | 4.0 (1.4)               | 1        | 3                         | 1   | 5           | 4                                   | 5.3 (1.0)               | 1   | 5                        | 1       | 6     | 0                |       | 4     | 4.5 (1.0)                | 10    | 4.1 (1.1)                | 1     | 3                          | 4     | 3.3 (2.4)                        | 1       | 3                        |
| Animal fluency             | 12                | 5.7 (3.3) <sup>+</sup>    | 57   | 8.5 (4.8)*   | 19                         | 7.4 (3.3)               | 34       | 9.1 (5.5)               | 4        | 8.8 (5.2)                 | 3   | 9.0 (1.7)   | 8                                   | 6.3 (2.9)               | 3   | 9.0 (1.7)                | 1       | 12    | 1                | 6     | 6     | 8.7 (4.2)                | 17    | 8.6 (5.5)                | 5     | 6.6 (5.0)                  | 6     | 12.8 (6.4)                       | 4       | 8.8 (5.2)                |

Statistical analyses were conducted on groups with N≥4 only. Blue highlighting indicates a significant difference existed among groups included in the analysis.

Comparison of primary diagnoses: independent samples t-test equal variances not assumed,  $p < .05$ .

\* significant difference between FTLD and AD

Comparison of FTLD major molecular classes: One-way ANOVA with Bonferroni post-hoc,  $p < .05$

1 significantly different from FTLD-Tau

2 significantly different from FTLD-TDP

3 significantly different from FTLD-FUS

Comparison of FTLD major molecular class subtypes: One-way ANOVA with Bonferroni post-hoc,  $p < .05$ .

a=significantly different from Pick's

b=significantly different from CBD

c=significantly different from PSP

d=significantly different from TDP-A

e=significantly different from TDP-B

f=significantly different from TDP-C

g=significantly different from TDP-U

h=significantly different from aFTLD-U

AD – Alzheimer's disease, ALS – amyotrophic lateral sclerosis, aFTLD-U – atypical frontotemporal lobar degeneration with ubiquitin positive inclusions, CBD – corticobasal degeneration, CDR – clinical dementia rating scale, CVLT-SF LDFR – California Verbal Learning Test short form long delay free recall, FTDP-17 – frontotemporal dementia and parkinsonism linked to chromosome 17, FTLD – frontotemporal lobar degeneration, FUS – fused in sarcoma, MMSE – Mini Mental State Examination, PiD – Pick's disease, PPVT – Peabody Picture Vocabulary Test, PSP – progressive supranuclear palsy, TDP-43 – transactive response DNA binding protein 43 kDA, TDP-U – unclassifiable TDP-43



**Supplementary Table 10 – Neuropsychological testing results by pathological diagnosis among patients meeting FTDC possible bvFTD criteria**

|                            | Primary diagnosis |              |      |              | FTLD major molecular class |                         |          |                         |          |                           |     |             | FTLD major molecular class subtypes |                         |     |                          |         |       |                  |       |       |                       |       |                          |       |                            |       |                                  |         |                          |
|----------------------------|-------------------|--------------|------|--------------|----------------------------|-------------------------|----------|-------------------------|----------|---------------------------|-----|-------------|-------------------------------------|-------------------------|-----|--------------------------|---------|-------|------------------|-------|-------|-----------------------|-------|--------------------------|-------|----------------------------|-------|----------------------------------|---------|--------------------------|
|                            | AD                |              | FTLD |              | FTLD-tau                   |                         | FTLD-TDP |                         | FTLD-FUS |                           | PID |             | CBD                                 |                         | PSP |                          | FTDP-17 |       | Unclassified tau |       | TDP-A |                       | TDP-B |                          | TDP-C |                            | TDP-U |                                  | aFTLD-U |                          |
|                            | N                 | M(SD)        | N    | M(SD)        | N                          | M(SD)                   | N        | M(SD)                   | N        | M(SD)                     | N   | M(SD)       | N                                   | M(SD)                   | N   | M(SD)                    | N       | M(SD) | N                | M(SD) | N     | M(SD)                 | N     | M(SD)                    | N     | M(SD)                      | N     | M(SD)                            | N       | M(SD)                    |
| Age                        | 7                 | 67.4 (12.5)  | 51   | 61 (8)       | 16                         | 62.5 (5.8) <sup>3</sup> | 31       | 61.7 (8.1) <sup>3</sup> | 4        | 48.8 (4.5) <sup>1,2</sup> | 3   | 61.7 (10.2) | 6                                   | 63 (4.3)                | 5   | 63.9 (6.1)               | 1       | 59.7  | 1                | 57.2  | 5     | 61.9 (6.6)            | 15    | 61.7 (8.9)               | 5     | 64.4 (8.7)                 | 6     | 59.5 (8.2)                       | 4       | 48.8 (4.5)               |
| %male                      | 7                 | 71%          | 51   | 82%          | 16                         | 94%                     | 31       | 77%                     | 4        | 75%                       | 3   | 100%        | 6                                   | 83%                     | 5   | 100%                     | 1       | 100%  | 1                | 100%  | 5     | 60%                   | 15    | 80%                      | 5     | 80%                        | 6     | 83%                              | 4       | 75%                      |
| CDR – Total                | 6                 | 0.9 (0.2)    | 42   | 1.1 (0.6)    | 14                         | 0.9 (0.5)               | 25       | 1.1 (0.7)               | 3        | 1.7 (0.6)                 | 3   | 0.8 (0.3)   | 5                                   | 1 (0.6)                 | 4   | 0.6 (0.3)                | 1       | 1     | 1                | 2     | 5     | 1 (0.6)               | 13    | 1.2 (0.7)                | 3     | 1.2 (0.8)                  | 4     | 0.8 (0.3)                        | 3       | 1.7 (0.6)                |
| CDR – sum of boxes         | 6                 | 5.3 (0.6)    | 42   | 5.9 (3.2)    | 14                         | 5.9 (3.3)               | 25       | 5.7 (3.3)               | 3        | 7.8 (2.1)                 | 3   | 5.5 (3.6)   | 5                                   | 6.3 (3.6)               | 4   | 4.6 (3.1)                | 1       | 4.5   | 1                | 11    | 5     | 6.5 (4.7)             | 13    | 5.8 (3.3)                | 3     | 6.2 (1.8)                  | 4     | 3.8 (2)                          | 3       | 7.8 (2.1)                |
| MMSE                       | 7                 | 18.1 (8.5)*  | 51   | 25.2 (4.1)*  | 16                         | 25.3 (4.9)              | 31       | 25.1 (3.6)              | 4        | 25.5 (5.1)                | 3   | 27.7 (1.2)  | 6                                   | 23 (7.2)                | 5   | 27 (2.3)                 | 1       | 26    | 1                | 22    | 5     | 24 (4.6)              | 15    | 24.5 (3.8)               | 5     | 26 (2.8)                   | 6     | 26.7 (2.7)                       | 4       | 25.5 (5.1)               |
| <b>Executive function</b>  |                   |              |      |              |                            |                         |          |                         |          |                           |     |             |                                     |                         |     |                          |         |       |                  |       |       |                       |       |                          |       |                            |       |                                  |         |                          |
| Trailmaking                | 7                 | 113.4 (17.4) | 48   | 82.6 (40.8)  | 16                         | 97.4 (35.5)             | 29       | 76 (41.9)               | 3        | 67 (47.8)                 | 3   | 95.3 (42.7) | 6                                   | 119.7 (0.8)             | 5   | 71.8 (44.7)              | 1       | 75    | 1                | 120   | 5     | 73.8 (44.7)           | 13    | 86.5 (37.2)              | 5     | 81 (48.5)                  | 6     | 51 (44.3)                        | 3       | 67 (47.8)                |
| Stroop                     | 7                 | 8.1 (8)*     | 43   | 26.9 (18.7)* | 12                         | 20.9 (12.2)             | 27       | 30 (20.5)               | 4        | 23.5 (22.1)               | 2   | 30.5 (20.5) | 5                                   | 16.2 (9.3) <sup>f</sup> | 4   | 20.8 (13.6) <sup>f</sup> | 1       | 26    | 0                | 0     | 4     | 24 (9.4) <sup>f</sup> | 14    | 21.1 (12.8) <sup>g</sup> | 4     | 30.8 (11.2)                | 5     | 59.4 (25.2) <sup>b,c,d,e,h</sup> | 4       | 23.5 (22.1) <sup>e</sup> |
| Design Fluency Correct     | 6                 | 2 (1.9)*     | 47   | 5.7 (3.3)*   | 14                         | 4.9 (2.7)               | 29       | 6.4 (3.6)               | 4        | 3.3 (1.7)                 | 3   | 5.3 (0.6)   | 5                                   | 3 (1.6)                 | 4   | 4.8 (3)                  | 1       | 10    | 1                | 8     | 4     | 6.3 (5.1)             | 15    | 5.7 (2.7)                | 4     | 9 (5.7)                    | 6     | 6.3 (3.1)                        | 4       | 3.3 (1.7)                |
| D-word Fluency             | 7                 | 4.9 (3.4)    | 51   | 6 (3.6)      | 16                         | 5.5 (3.7)               | 31       | 6.3 (3.4)               | 4        | 6 (5.5)                   | 3   | 8.7 (3.2)   | 6                                   | 4.3 (3.7)               | 5   | 5 (3.5)                  | 1       | 9     | 1                | 2     | 5     | 6 (2.5)               | 15    | 5.2 (3.5)                | 5     | 8.2 (1.1)                  | 6     | 7.7 (4.3)                        | 4       | 6 (5.5)                  |
| Design Fluency repetitions | 6                 | 0 (0)*       | 47   | 4.3 (4.3)*   | 14                         | 4.3 (4.9)               | 29       | 3.7 (3.4)               | 4        | 9 (6.4)                   | 3   | 4.7 (8.1)   | 5                                   | 6.6 (5.3)               | 4   | 2.8 (2.1)                | 1       | 1     | 1                | 1     | 4     | 2 (2.2)               | 15    | 5.1 (3.1)                | 4     | 0.8 (0.5)                  | 6     | 3.5 (4.6)                        | 4       | 9 (6.4)                  |
| Rule violations            | 5                 | 18.8 (13.1)* | 34   | 6.4 (7.4)*   | 10                         | 7.8 (6)                 | 22       | 5.9 (8.1)               | 2        | 5.5 (7.8)                 | 2   | 8 (5.7)     | 4                                   | 7.5 (3.4)               | 3   | 10.7 (9.3)               | 1       | 0     | 0                | 0     | 3     | 4 (6.1)               | 12    | 7.8 (10)                 | 2     | 1.5 (2.1)                  | 5     | 4.2 (4.5)                        | 2       | 5.5 (7.8)                |
| <b>Memory</b>              |                   |              |      |              |                            |                         |          |                         |          |                           |     |             |                                     |                         |     |                          |         |       |                  |       |       |                       |       |                          |       |                            |       |                                  |         |                          |
| CVLT-SF LDFR               | 7                 | 1.9 (3.1)    | 51   | 3.3 (2.2)    | 16                         | 3.2 (2.1)               | 31       | 3.7 (2.2) <sup>3</sup>  | 4        | 0.8 (1) <sup>2</sup>      | 3   | 5.3 (0.6)   | 6                                   | 2.3 (1.9)               | 5   | 4 (1.7)                  | 1       | 1     | 1                | 0     | 5     | 3.2 (2.6)             | 15    | 3.7 (2)                  | 5     | 4 (3.2)                    | 6     | 4 (2)                            | 4       | 0.8 (1)                  |
| CVLT-SF d-prime            | 7                 | 1.4 (0.8)    | 51   | 2.1 (1)      | 16                         | 2 (1.1)                 | 31       | 2.2 (1)                 | 4        | 1.4 (1.3)                 | 3   | 2 (1.8)     | 6                                   | 1.7 (1.1)               | 5   | 2.4 (0.8)                | 1       | 2.6   | 1                | 1.5   | 5     | 1.9 (0.7)             | 15    | 2.3 (1)                  | 5     | 1.4 (1.3)                  | 6     | 2.7 (0.9)                        | 4       | 1.4 (1.3)                |
| Benson Delay               | 7                 | 4.7 (3.5)    | 51   | 7.5 (4.5)    | 16                         | 7.3 (4.9)               | 31       | 8.3 (4.2)               | 4        | 3 (2.9)                   | 3   | 9.3 (4.7)   | 6                                   | 6.8 (4.6)               | 5   | 8.6 (5.8)                | 1       | 2     | 1                | 2     | 5     | 6.4 (4)               | 15    | 9.1 (3.8)                | 5     | 5 (3.7)                    | 6     | 10.7 (4)                         | 4       | 3 (2.9)                  |
| <b>Visuospatial</b>        |                   |              |      |              |                            |                         |          |                         |          |                           |     |             |                                     |                         |     |                          |         |       |                  |       |       |                       |       |                          |       |                            |       |                                  |         |                          |
| Benson Copy                | 7                 | 10.7 (6)*    | 51   | 13.9 (2.8)*  | 16                         | 13.9 (2.1)              | 31       | 14 (2.5)                | 4        | 12.8 (6.6)                | 3   | 15.3 (1.2)  | 6                                   | 13.8 (2.5)              | 5   | 12.6 (1.9)               | 1       | 16    | 1                | 15    | 5     | 14 (2.1)              | 15    | 14.2 (1.6)               | 5     | 12.6 (4.5)                 | 6     | 14.8 (3.1)                       | 4       | 12.8 (6.6)               |
| <b>Language</b>            |                   |              |      |              |                            |                         |          |                         |          |                           |     |             |                                     |                         |     |                          |         |       |                  |       |       |                       |       |                          |       |                            |       |                                  |         |                          |
| PPVT                       | 2                 | 15.5 (0.7)   | 32   | 13.6 (2.1)   | 10                         | 13.8 (2.3)              | 20       | 13.3 (2.1)              | 2        | 15 (1.4)                  | 2   | 15.5 (0.7)  | 3                                   | 14.3 (1.5)              | 3   | 14 (2.6)                 | 1       | 13    | 1                | 9     | 3     | 12 (3.5)              | 11    | 12.7 (1.6) <sup>f</sup>  | 0     |                            | 6     | 15 (1.1) <sup>e</sup>            | 2       | 15 (1.4)                 |
| Naming                     | 7                 | 10.7 (4.3)   | 50   | 11.7 (3.5)   | 15                         | 12.3 (3.8)              | 31       | 11.1 (3.5)              | 4        | 13.5 (2.4)                | 3   | 15 (0)      | 5                                   | 11.6 (2.9)              | 5   | 14.2 (1.3) <sup>f</sup>  | 1       | 9     | 1                | 2     | 5     | 12.2 (2.3)            | 15    | 11.4 (3.1)               | 5     | 6.8 (4.3) <sup>c,g,h</sup> | 6     | 13.2 (1.7) <sup>f</sup>          | 4       | 13.5 (2.4) <sup>f</sup>  |
| Repetition                 | 6                 | 2.2 (1)*     | 51   | 2.7 (0.6)*   | 16                         | 2.7 (0.6)               | 31       | 2.7 (0.6)               | 4        | 3 (0)                     | 3   | 2.7 (0.6)   | 6                                   | 2.8 (0.4)               | 5   | 2.8 (0.4)                | 1       | 3     | 1                | 1     | 5     | 2.8 (0.4)             | 15    | 2.9 (0.4)                | 5     | 2.4 (0.9)                  | 6     | 2.5 (0.8)                        | 4       | 3 (0)                    |
| Verbal Agility             | 2                 | 4 (2.8)      | 26   | 4.3 (1.3)    | 8                          | 5 (0.9)                 | 17       | 4 (1.4)                 | 1        | 3                         | 1   | 5           | 3                                   | 5 (1)                   | 3   | 4.7 (1.2)                | 1       | 6     | 0                | 0     | 3     | 4.3 (1.2)             | 9     | 4.3 (0.9)                | 1     | 3                          | 4     | 3.3 (2.4)                        | 1       | 3                        |
| Animal fluency             | 7                 | 5.7 (2.6)    | 51   | 8.5 (4.5)    | 16                         | 7.5 (3.6)               | 31       | 8.9 (4.9)               | 4        | 8.8 (5.2)                 | 3   | 9 (1.7)     | 6                                   | 6.2 (3.3)               | 5   | 7.6 (4.8)                | 1       | 12    | 1                | 6     | 5     | 9.2 (4.4)             | 15    | 8.1 (4)                  | 5     | 6.6 (5)                    | 6     | 12.8 (6.4)                       | 4       | 8.8 (5.2)                |

Statistical analyses were conducted on groups with N≥4 only. Blue highlighting indicates a significant difference existed among groups included in the analysis.

Comparison of primary diagnoses: independent samples t-test equal variances not assumed, p<.05.

\* significant difference between FTLD and AD

Comparison of FTLD major molecular classes: One-way ANOVA with Bonferroni post-hoc,  $p < .05$

1 significantly different from FTLD-Tau

2 significantly different from FTLD-TDP

3 significantly different from FTLD-FUS

Comparison of FTLD major molecular class subtypes: One-way ANOVA with Bonferroni post-hoc,  $p < .05$ .

a=significantly different from Pick's

b=significantly different from CBD

c=significantly different from PSP

d=significantly different from TDP-A

e=significantly different from TDP-B

f=significantly different from TDP-C

g=significantly different from TDP-U

h=significantly different from aFTLD-U

AD – Alzheimer's disease, ALS – amyotrophic lateral sclerosis, aFTLD-U – atypical frontotemporal lobar degeneration with ubiquitin positive inclusions, CBD – corticobasal degeneration, CDR – clinical dementia rating scale, CVLT-SF LDFR – California Verbal Learning Test short form long delay free recall, FTDP-17 – frontotemporal dementia and parkinsonism linked to chromosome 17, FTL – frontotemporal lobar degeneration, FUS – fused in sarcoma, MMSE – Mini Mental State Examination, PID – Pick's disease, PPVT – Peabody Picture Vocabulary Test, PSP – progressive supranuclear palsy, TDP-43 – transactive response DNA binding protein 43 kDa, TDP-U – unclassifiable TDP-43

**Supplementary Table 11 – Neuropsychological testing results by pathological diagnosis among patients meeting FTDC probable bvFTD criteria**

|                            | Primary diagnosis |              |      |              | FTLD major molecular class |              |          |             |          |             |     |             | FTLD major molecular class subtypes |             |     |              |         |       |                  |       |       |             |       |                         |       |                          |       |                         |         |             |
|----------------------------|-------------------|--------------|------|--------------|----------------------------|--------------|----------|-------------|----------|-------------|-----|-------------|-------------------------------------|-------------|-----|--------------|---------|-------|------------------|-------|-------|-------------|-------|-------------------------|-------|--------------------------|-------|-------------------------|---------|-------------|
|                            | AD                |              | FTLD |              | FTLD-tau                   |              | FTLD-TDP |             | FTLD-FUS |             | PID |             | CBD                                 |             | PSP |              | FTDP-17 |       | Unclassified tau |       | TDP-A |             | TDP-B |                         | TDP-C |                          | TDP-U |                         | aFTLD-U |             |
|                            | N                 | M(SD)        | N    | M(SD)        | N                          | M(SD)        | N        | M(SD)       | N        | M(SD)       | N   | M(SD)       | N                                   | M(SD)       | N   | M(SD)        | N       | M(SD) | N                | M(SD) | N     | M(SD)       | N     | M(SD)                   | N     | M(SD)                    | N     | M(SD)                   | N       | M(SD)       |
| Age                        | 6                 | 69.2 (12.7)* | 40   | 60.3 (8.4)*  | 12                         | 63.5 (6.3)   | 25       | 60.4 (8.2)  | 3        | 46.5 (0.6)  | 3   | 61.7 (10.2) | 4                                   | 65 (3.3)    | 3   | 66.6 (6.8)   | 1       | 59.7  | 1                | 57.2  | 3     | 58.8 (6.5)  | 13    | 60.1 (8.5)              | 5     | 64.4 (8.7)               | 4     | 57.8 (8.9)              | 3       | 46.5 (0.6)  |
| %male                      | 6                 | 67%          | 40   | 83%          | 12                         | 92%          | 25       | 80%         | 3        | 67%         | 3   | 100%        | 4                                   | 75%         | 3   | 100%         | 1       | 100%  | 1                | 100%  | 3     | 67%         | 13    | 77%                     | 5     | 80%                      | 4     | 100%                    | 3       | 67%         |
| CDR - Total                | 5                 | 0.9 (0.2)    | 33   | 1.2 (0.6)    | 10                         | 1.1 (0.5)    | 20       | 1.1 (0.7)   | 3        | 1.7 (0.6)   | 3   | 0.8 (0.3)   | 3                                   | 1.3 (0.6)   | 2   | 0.8 (0.4)    | 1       | 1     | 1                | 2     | 3     | 1.2 (0.8)   | 11    | 1.1 (0.7)               | 3     | 1.2 (0.8)                | 3     | 0.8 (0.3)               | 3       | 1.7 (0.6)   |
| CDR – sum of boxes         | 5                 | 5.4 (0.7)    | 33   | 6.4 (3.2)    | 10                         | 7.1 (3.2)    | 20       | 5.8 (3.4)   | 3        | 7.8 (2.1)   | 3   | 5.5 (3.6)   | 3                                   | 8.3 (3.2)   | 2   | 6.8 (3.2)    | 1       | 4.5   | 1                | 11    | 3     | 8 (5.3)     | 11    | 5.7 (3.4)               | 3     | 6.2 (1.8)                | 3     | 3.8 (2.5)               | 3       | 7.8 (2.1)   |
| MMSE                       | 6                 | 19.7 (8.2)*  | 40   | 24.9 (4.3)*  | 12                         | 24.8 (5.6)   | 25       | 24.6 (3.8)  | 3        | 27.7 (3.2)  | 3   | 27.7 (1.2)  | 4                                   | 21.8 (9)    | 3   | 26.3 (2.9)   | 1       | 26    | 1                | 22    | 3     | 22 (5.2)    | 13    | 24.1 (4)                | 5     | 26 (2.8)                 | 4     | 26.5 (3)                | 3       | 27.7 (3.2)  |
| <b>Executive function</b>  |                   |              |      |              |                            |              |          |             |          |             |     |             |                                     |             |     |              |         |       |                  |       |       |             |       |                         |       |                          |       |                         |         |             |
| Trailmaking                | 6                 | 112.3 (18.8) | 38   | 87.3 (40)    | 12                         | 105.2 (26.6) | 23       | 80.7 (43)   | 3        | 67 (47.8)   | 3   | 95.3 (42.7) | 4                                   | 120 (0)     | 3   | 100.3 (29.8) | 1       | 75    | 1                | 120   | 3     | 69.3 (48.6) | 11    | 92.5 (35.5)             | 5     | 81 (48.5)                | 4     | 56 (56.2)               | 3       | 67 (47.8)   |
| Stroop                     | 6                 | 8.7 (8.6)*   | 34   | 24.6 (14.9)* | 9                          | 21.1 (11.6)  | 22       | 25.4 (15.3) | 3        | 28.7 (23.9) | 2   | 30.5 (20.5) | 4                                   | 16.5 (10.7) | 2   | 18.5 (4.9)   | 1       | 26    | 0                |       | 3     | 24 (11.5)   | 12    | 18.8 (12.3)             | 4     | 30.8 (11.2)              | 3     | 46.3 (17.6)             | 3       | 28.7 (23.9) |
| Design Fluency Correct     | 5                 | 1.6 (1.8)*   | 38   | 5.8 (3.5)*   | 11                         | 4.7 (2.8)    | 24       | 6.6 (3.8)   | 3        | 4 (1)       | 3   | 5.3 (0.6)   | 3                                   | 2.3 (1.5)   | 3   | 3.7 (2.5)    | 1       | 10    | 1                | 8     | 3     | 7 (6)       | 13    | 5.8 (2.8)               | 4     | 9 (5.7)                  | 4     | 6.5 (3.7)               | 3       | 4 (1)       |
| D-word Fluency             | 6                 | 5.2 (3.6)    | 40   | 6.2 (3.6)    | 12                         | 5.5 (3.8)    | 25       | 6.4 (3.3)   | 3        | 7 (6.2)     | 3   | 8.7 (3.2)   | 4                                   | 5 (4.5)     | 3   | 3 (1)        | 1       | 9     | 1                | 2     | 3     | 7.7 (1.5)   | 13    | 5 (3.8)                 | 5     | 8.2 (1.1)                | 4     | 7.8 (3.3)               | 3       | 7 (6.2)     |
| Design Fluency repetitions | 5                 | 0 (0)*       | 38   | 4 (4.1)*     | 11                         | 3.8 (4.5)    | 24       | 3.5 (3.3)   | 3        | 8.3 (7.6)   | 3   | 4.7 (8.1)   | 3                                   | 6 (3.6)     | 3   | 2.7 (2.5)    | 1       | 1     | 1                | 1     | 3     | 1 (1)       | 13    | 5.4 (3.2) <sup>f</sup>  | 4     | 0.8 (0.5) <sup>e</sup>   | 4     | 2.3 (2.2)               | 3       | 8.3 (7.6)   |
| Rule violations            | 4                 | 20.8 (14.3)* | 28   | 6.3 (7.4)*   | 8                          | 6.4 (4.3)    | 18       | 6.4 (8.7)   | 2        | 5.5 (7.8)   | 2   | 8 (5.7)     | 3                                   | 8 (4)       | 2   | 5.5 (3.5)    | 1       | 0     | 0                |       | 3     | 4 (6.1)     | 10    | 9.1 (10.6)              | 2     | 1.5 (2.1)                | 3     | 3 (4.4)                 | 2       | 5.5 (7.8)   |
| <b>Memory</b>              |                   |              |      |              |                            |              |          |             |          |             |     |             |                                     |             |     |              |         |       |                  |       |       |             |       |                         |       |                          |       |                         |         |             |
| CVLT-SF LDFR               | 6                 | 2.2 (3.3)    | 40   | 3.3 (2.3)    | 12                         | 2.8 (2.3)    | 25       | 3.8 (2.3)   | 3        | 1 (1)       | 3   | 5.3 (0.6)   | 4                                   | 1.8 (2.1)   | 3   | 3.3 (2.1)    | 1       | 1     | 1                | 0     | 3     | 1.7 (1.5)   | 13    | 3.9 (2.1)               | 5     | 4 (3.2)                  | 4     | 4.5 (2.4)               | 3       | 1 (1)       |
| CVLT-SF d-prime            | 6                 | 1.6 (0.7)    | 40   | 2 (1.1)      | 12                         | 1.9 (1.2)    | 25       | 2.2 (1)     | 3        | 0.9 (1.1)   | 3   | 2 (1.8)     | 4                                   | 1.3 (1.1)   | 3   | 2.5 (1)      | 1       | 2.6   | 1                | 1.5   | 3     | 1.5 (0.5)   | 13    | 2.5 (0.9)               | 5     | 1.4 (1.3)                | 4     | 2.6 (0.9)               | 3       | 0.9 (1.1)   |
| Benson Delay               | 6                 | 5.3 (3.4)    | 40   | 7.4 (4.8)    | 12                         | 6.2 (4.9)    | 25       | 8.4 (4.5)   | 3        | 3 (3.6)     | 3   | 9.3 (4.7)   | 4                                   | 6 (5.4)     | 3   | 6 (6)        | 1       | 2     | 1                | 2     | 3     | 6 (5.6)     | 13    | 9 (4)                   | 5     | 5 (3.7)                  | 4     | 12.8 (2.8)              | 3       | 3 (3.6)     |
| <b>Visuospatial</b>        |                   |              |      |              |                            |              |          |             |          |             |     |             |                                     |             |     |              |         |       |                  |       |       |             |       |                         |       |                          |       |                         |         |             |
| Benson Copy                | 6                 | 11.7 (6)     | 40   | 14.3 (2.4)   | 12                         | 14.2 (2.3)   | 25       | 14.2 (2.6)  | 3        | 16 (1)      | 3   | 15.3 (1.2)  | 4                                   | 13.5 (3.1)  | 3   | 13 (2.6)     | 1       | 16    | 1                | 15    | 3     | 14.7 (2.5)  | 13    | 14.1 (1.6)              | 5     | 12.6 (4.5)               | 4     | 16 (1.4)                | 3       | 16 (1)      |
| <b>Language</b>            |                   |              |      |              |                            |              |          |             |          |             |     |             |                                     |             |     |              |         |       |                  |       |       |             |       |                         |       |                          |       |                         |         |             |
| PPVT                       | 1                 | 16           | 25   | 13.6 (2.1)   | 7                          | 13.4 (2.6)   | 16       | 13.6 (2)    | 2        | 15 (1.4)    | 2   | 15.5 (0.7)  | 2                                   | 15 (1.4)    | 1   | 11           | 1       | 13    | 1                | 9     | 3     | 12 (3.5)    | 9     | 13.2 (1.2) <sup>g</sup> | 0     |                          | 4     | 15.5 (0.6) <sup>e</sup> | 2       | 15 (1.4)    |
| Naming                     | 6                 | 10 (4.2)     | 40   | 11.7 (3.7)   | 12                         | 11.8 (4)     | 25       | 11.3 (3.7)  | 3        | 14.7 (0.6)  | 3   | 15 (0)      | 4                                   | 11 (2.9)    | 3   | 13.7 (1.5)   | 1       | 9     | 1                | 2     | 3     | 11.7 (2.9)  | 13    | 12 (2.7) <sup>f</sup>   | 5     | 6.8 (4.3) <sup>g,e</sup> | 4     | 14.3 (0.5) <sup>f</sup> | 3       | 14.7 (0.6)  |
| Repetition                 | 5                 | 2.4 (0.9)    | 40   | 2.7 (0.6)    | 12                         | 2.6 (0.7)    | 25       | 2.7 (0.5)   | 3        | 3 (0)       | 3   | 2.7 (0.6)   | 4                                   | 2.8 (0.5)   | 3   | 2.7 (0.6)    | 1       | 3     | 1                | 1     | 3     | 2.7 (0.6)   | 13    | 2.8 (0.4)               | 5     | 2.4 (0.9)                | 4     | 2.8 (0.5)               | 3       | 3 (0)       |
| Verbal Agility             | 1                 | 6            | 19   | 4.2 (1)      | 6                          | 5 (0.9)      | 12       | 3.9 (0.8)   | 1        | 3           | 1   | 5           | 3                                   | 5 (1)       | 1   | 4            | 1       | 6     | 0                |       | 2     | 4 (1.4)     | 7     | 4 (0.6)                 | 1     | 3                        | 2     | 4 (1.4)                 | 1       | 3           |
| Animal fluency             | 6                 | 5.5 (2.8)    | 40   | 8.5 (4.8)    | 12                         | 7.4 (4.1)    | 25       | 8.9 (5.1)   | 3        | 10 (5.6)    | 3   | 9 (1.7)     | 4                                   | 6 (4.2)     | 3   | 6.7 (6.5)    | 1       | 12    | 1                | 6     | 3     | 10 (5.3)    | 13    | 8.1 (4.2)               | 5     | 6.6 (5)                  | 4     | 13.5 (6.8)              | 3       | 10 (5.6)    |

Statistical analyses were conducted on groups with N≥4 only. Blue highlighting indicates a significant difference existed among groups included in the analysis.

Comparison of primary diagnoses: independent samples t-test equal variances not assumed, p<.05.

\* significant difference between FTLD and AD

Comparison of FTL major molecular classes: One-way ANOVA with Bonferroni post-hoc,  $p < .05$

1 significantly different from FTLD-Tau

2 significantly different from FTLD-TDP

3 significantly different from FTLD-FUS

Comparison of FTL major molecular class subtypes: One-way ANOVA with Bonferroni post-hoc,  $p < .05$ .

a=significantly different from Pick's

b=significantly different from CBD

c=significantly different from PSP

d=significantly different from TDP-A

e=significantly different from TDP-B

f=significantly different from TDP-C

g=significantly different from TDP-U

h=significantly different from aFTLD-U

AD – Alzheimer's disease, ALS – amyotrophic lateral sclerosis, aFTLD-U – atypical frontotemporal lobar degeneration with ubiquitin positive inclusions, CBD – corticobasal degeneration, CDR – clinical dementia rating scale, CVLT-SF LDFR – California Verbal Learning Test short form long delay free recall, FTDP-17 – frontotemporal dementia and parkinsonism linked to chromosome 17, FTL – frontotemporal lobar degeneration, FUS – fused in sarcoma, MMSE – Mini Mental State Examination, PID – Pick's disease, PPVT – Peabody Picture Vocabulary Test, PSP – progressive supranuclear palsy, TDP-43 – transactive response DNA binding protein 43 kDA, TDP-U – unclassifiable TDP-43

**Supplementary table 12 – Components from categorical principal component analysis (CATPCA) of clinical data**

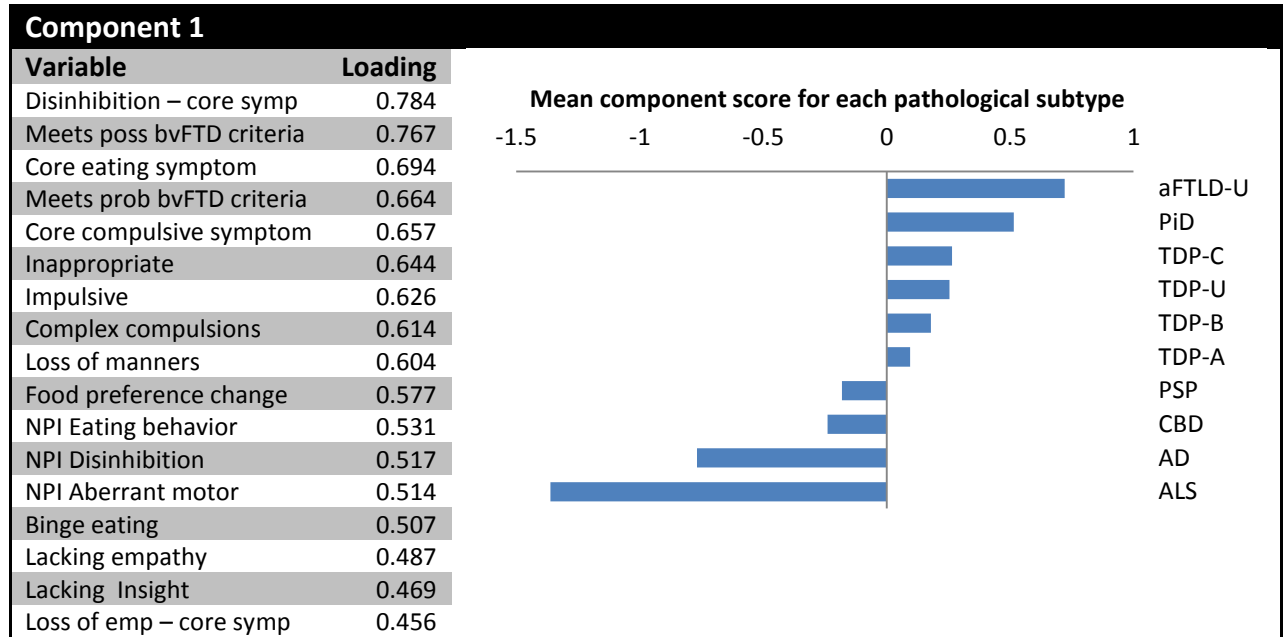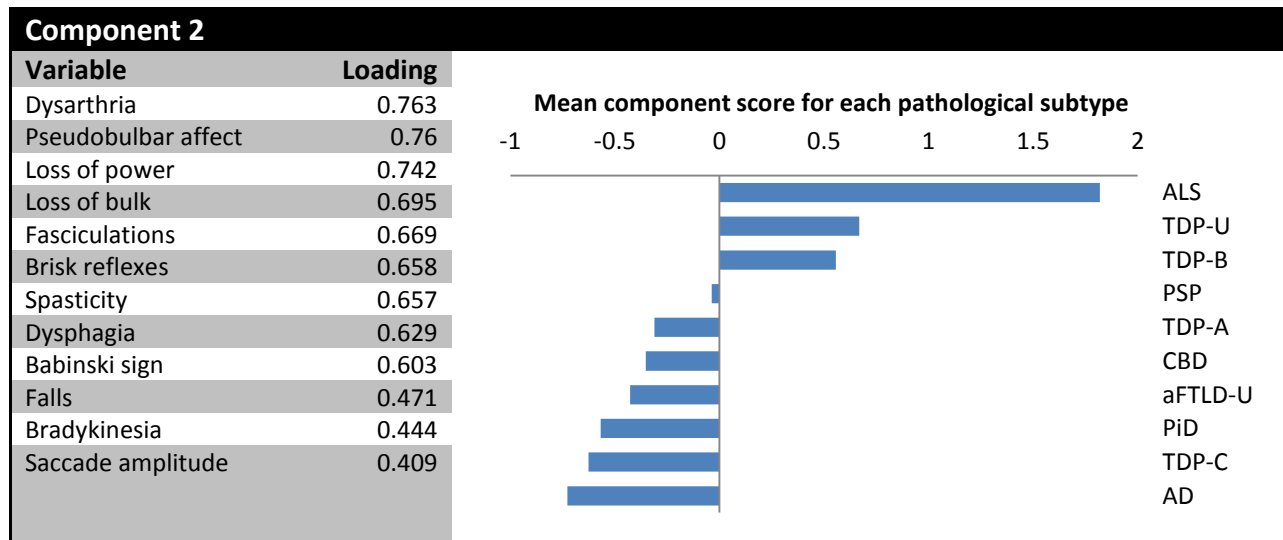

### Component 3

| Variable           | Loading |
|--------------------|---------|
| Retropulsion       | 0.687   |
| Saccade initiation | 0.636   |
| Saccade velocity   | 0.587   |
| Rest tremor        | 0.573   |
| Saccade amplitude  | 0.535   |
| Limb rigidity      | 0.534   |
| Gait change        | 0.51    |
| Axial rigidity     | 0.489   |
| Bradykinesia       | 0.427   |
| Tremor symptom     | 0.419   |
| Falls              | 0.413   |

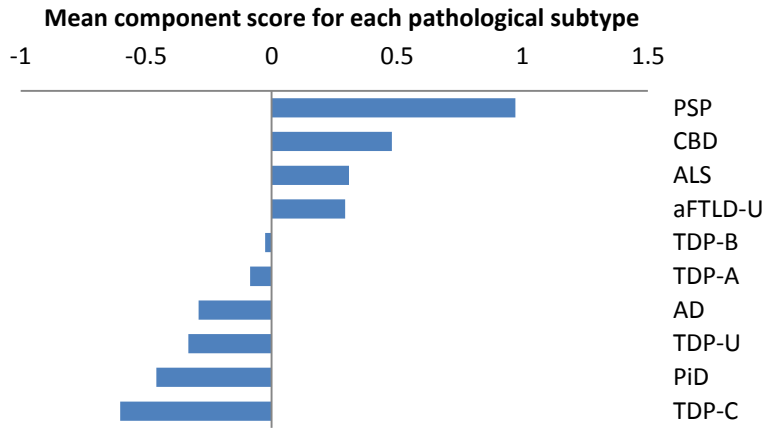

### Component 4

| Variable              | Loading |
|-----------------------|---------|
| Any executive symptom | 0.763   |
| Apathy – core symptom | 0.687   |
| Apathy                | 0.687   |
| Plan/organize         | 0.672   |
| Problem solving       | 0.634   |
| Multitasking          | 0.581   |
| NPI Agitation         | -0.433  |

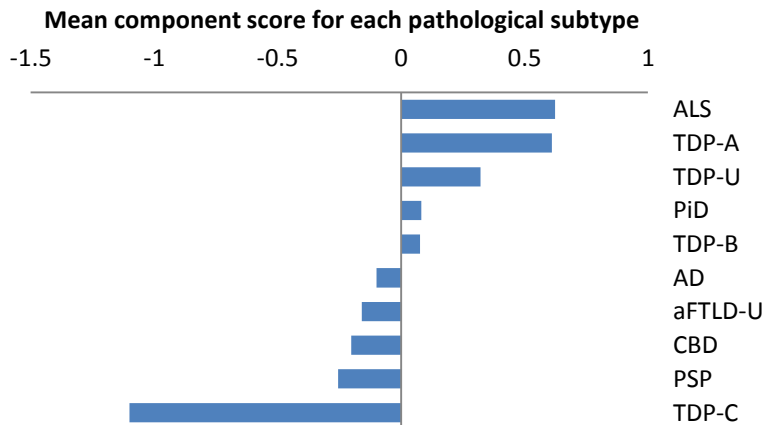

### Component 5

| Variable            | Loading |
|---------------------|---------|
| Myoclonus           | 0.449   |
| Age at death        | -0.896  |
| Age at onset        | -0.901  |
| Age at presentation | -0.925  |

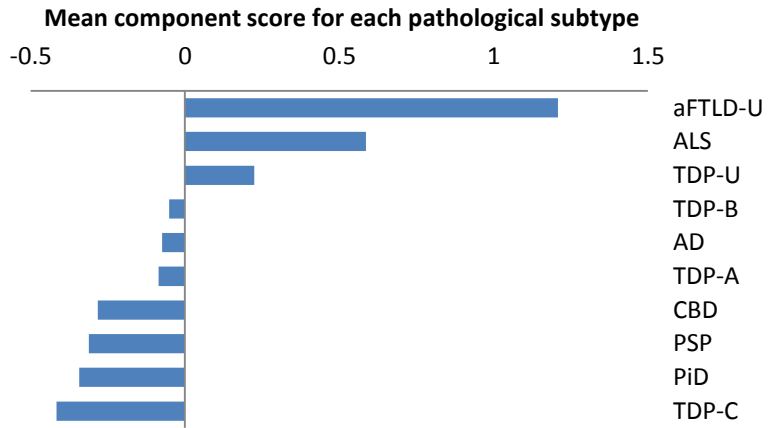

### Component 6

| Variable                                    | Loading |
|---------------------------------------------|---------|
| Neuropsych profile                          | 0.728   |
| Neuropsych profile – memory preserved       | 0.649   |
| Lack of empathy – core criteria feature     | 0.567   |
| Neuropsych profile – visuospatial preserved | 0.564   |
| Lacking warmth                              | 0.529   |
| Lacking empathy                             | 0.493   |
| Memory symptoms                             | -0.412  |

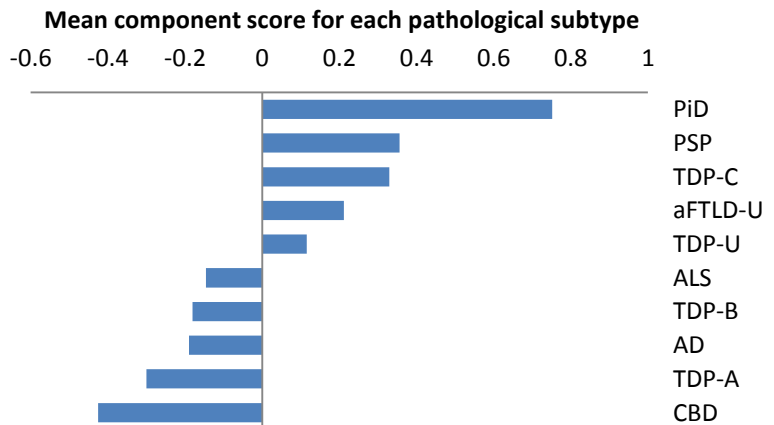

### Component 7

| Variable                                   | Loading |
|--------------------------------------------|---------|
| Delusions                                  | 0.684   |
| NPI Delusions                              | 0.647   |
| Hallucinations                             | 0.486   |
| Executive impairment on neuropsych profile | 0.453   |
| NPI Hallucinations                         | 0.419   |

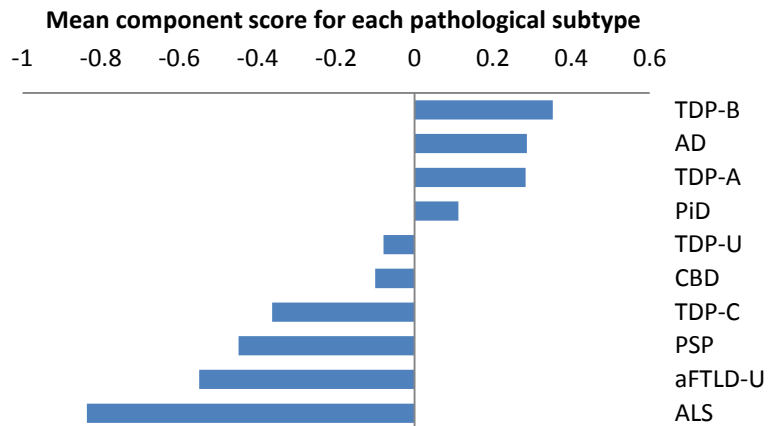

### Component 8

| Variable          | Loading |
|-------------------|---------|
| Oral exploration  | 0.539   |
| Binge eating      | 0.466   |
| Inertia           | 0.450   |
| Repetitive speech | 0.416   |
| Babinski sign     | 0.401   |
| Aggression        | -0.449  |

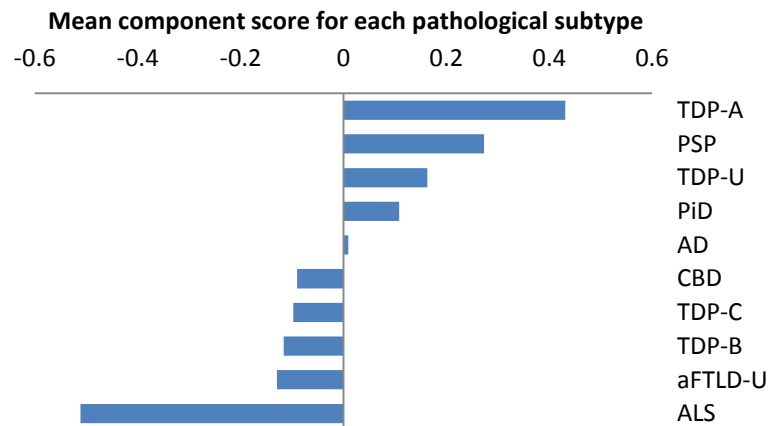



### Component 9

| Variable    | Loading |
|-------------|---------|
| NPI Sleep   | 0.626   |
| NPI Anxiety | 0.622   |
| NPI Apathy  | 0.539   |

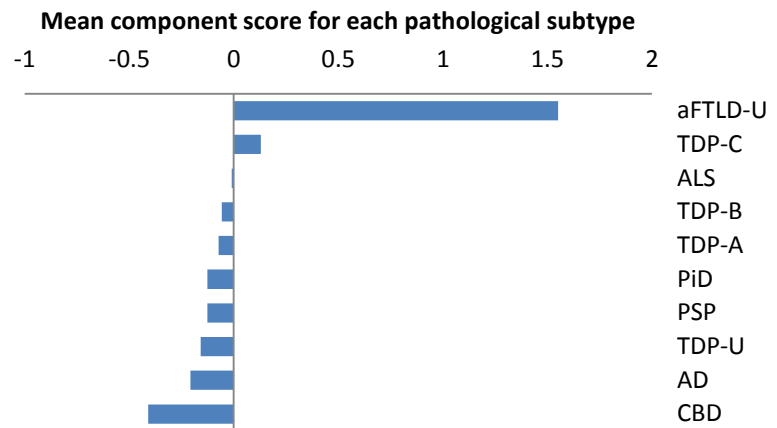

### Component 10

| Variable             | Loading |
|----------------------|---------|
| Object misperception | -0.534  |
| Depression           | -0.519  |
| Hyperreligiosity     | -0.534  |

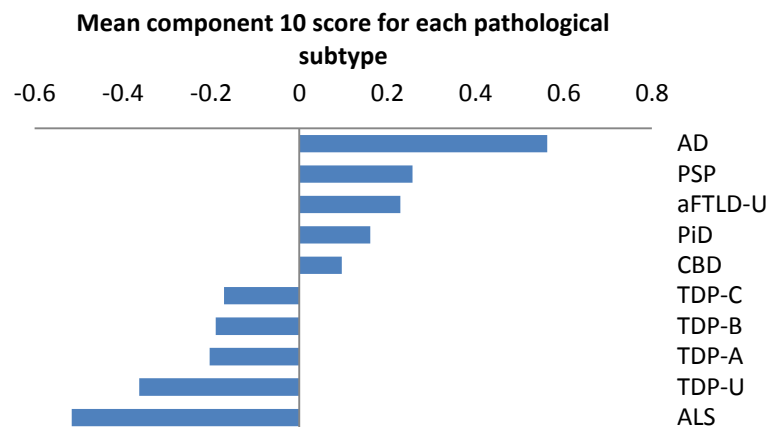

AD – Alzheimer’s disease, ALS – amyotrophic lateral sclerosis, aFTLD-U – atypical frontotemporal lobar degeneration with ubiquitin positive inclusions, CBD – corticobasal degeneration, NPI – Neuropsychiatric Inventory, PiD – Pick’s disease, PSP – progressive supranuclear palsy, TDP-43 – transactive response DNA binding protein 43 kDa, TDP-U – unclassifiable TDP-43

**Supplementary table 13 – Components from principal component analysis of neuropsychological testing**

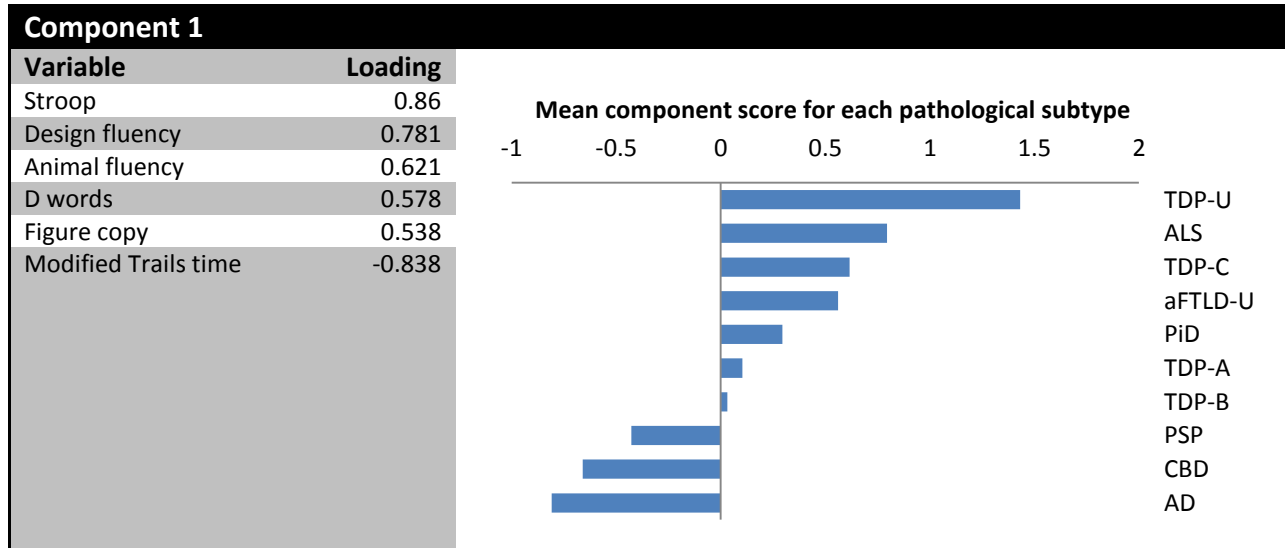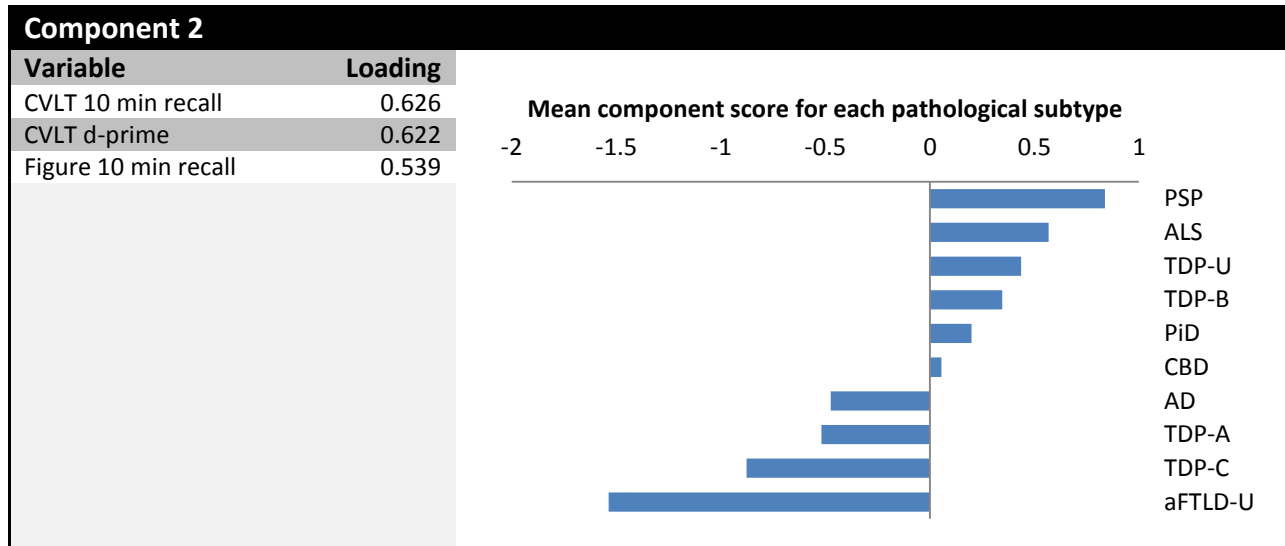

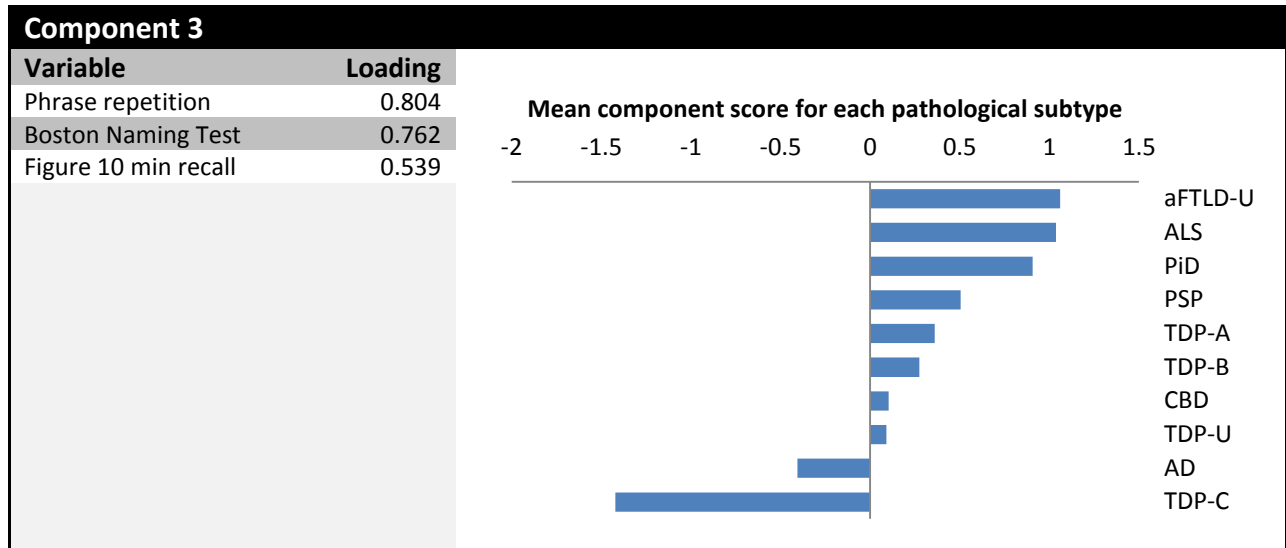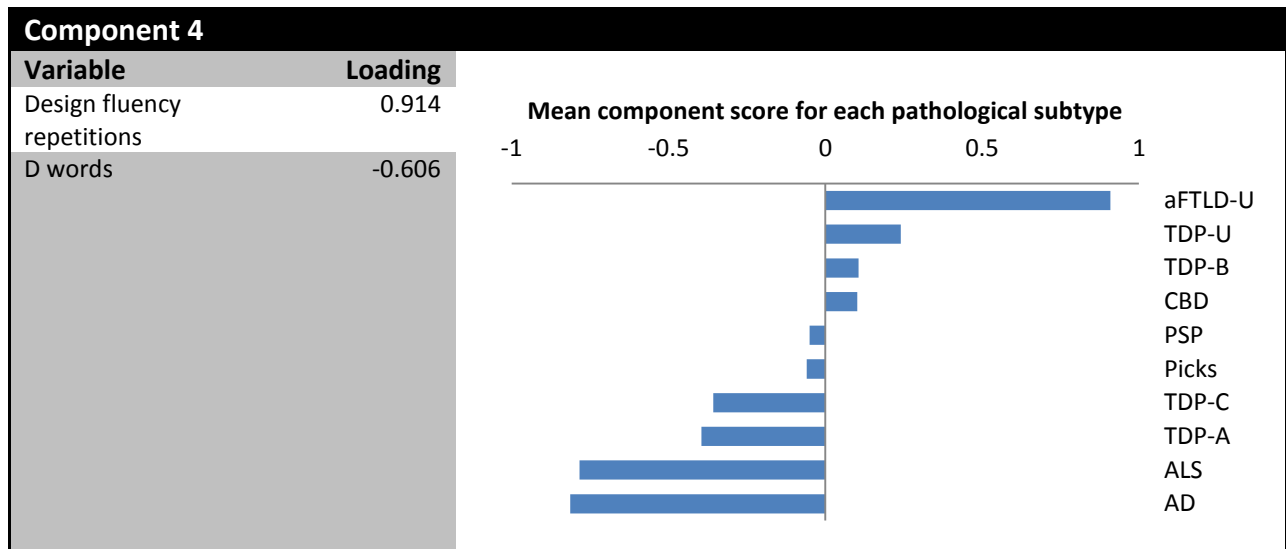

AD – Alzheimer’s disease, ALS – amyotrophic lateral sclerosis, aFTLD-U – atypical frontotemporal lobar degeneration with ubiquitin positive inclusions, CBD – corticobasal degeneration, CVLT – California Verbal Learning Test, PiD – Pick’s disease, PSP – progressive supranuclear palsy, TDP-43 – transactive response DNA binding protein 43 kDA, TDP-U – unclassifiable TDP-43

Higher test scores reflect greater impairment on modified Trails time and design fluency repetitions. On all other included tests lower scores reflect greater impairment.

**Supplementary Table 14 – Discriminant function analysis cross-validated classification accuracy (percent correctly classified) by pathological diagnosis (FTLD vs non-FTLD) using components derived from specified analyses**

|                                                                           | <b>Overall</b> | <b>FTLD</b> | <b>AD</b> | <b>ALS</b> |
|---------------------------------------------------------------------------|----------------|-------------|-----------|------------|
| Clinical CATPCA, n=109                                                    | 81.7           | 95.6        | 13.3      | 25.0       |
| Neuropsych testing PCA, n=54                                              | 72.2           | 92.5        | 18.2      | 0.0        |
| Gray matter PCA, n=82                                                     | 79.3           | 93.7        | 40.0      | 0.0        |
| White matter PCA, n=82                                                    | 78.0           | 98.4        | 6.7       | 25.0       |
| Clinical + Gray matter + White matter + Neuropsych PCA, n=75 <sup>1</sup> | 82.7           | 96.4        | 40.0      | 50.0       |

AD – Alzheimer’s disease, ALS – amyotrophic lateral sclerosis, CATPCA – categorical principal component analysis, FTLD – frontotemporal lobar degeneration, PCA – principal component analysis

<sup>1</sup>missing values imputed, stepwise component entry

**Supplementary Table 15 – Discriminant function analysis cross-validated classification accuracy (percent correctly classified) by pathological diagnosis (major molecular class) using components derived from specified analyses**

|                                                                           | <b>Overall</b> | <b>Tau</b> | <b>TDP-43</b> | <b>FUS</b> |
|---------------------------------------------------------------------------|----------------|------------|---------------|------------|
| Clinical CATPCA, n=90                                                     | 61.1           | 44.4       | 74.5          | 25.0       |
| Neuropsych testing PCA, n=40                                              | 57.5           | 18.2       | 76.9          | 33.3       |
| Gray matter PCA, n=63                                                     | 66.7           | 36.8       | 82.5          | 50.0       |
| White matter PCA, n=63                                                    | 65.1           | 31.6       | 82.5          | 50.0       |
| Clinical + Gray matter + White matter + Neuropsych PCA, n=56 <sup>1</sup> | 67.9           | 53.3       | 73.0          | 75.0       |

CATPCA – categorical principal component analysis, FUS – fused in sarcoma, PCA – principal component analysis, TDP-43 – transactive response DNA binding protein 43 kDa,

<sup>1</sup>missing values imputed, stepwise component entry
