# Supplementary material
Source: PubMed Central journal article supplement (PMC5841140)
Supplement: brain-2017-00549-file013_awx254.pdf [file brain-2017-00549-file013_awx254.pdf]

Component 1

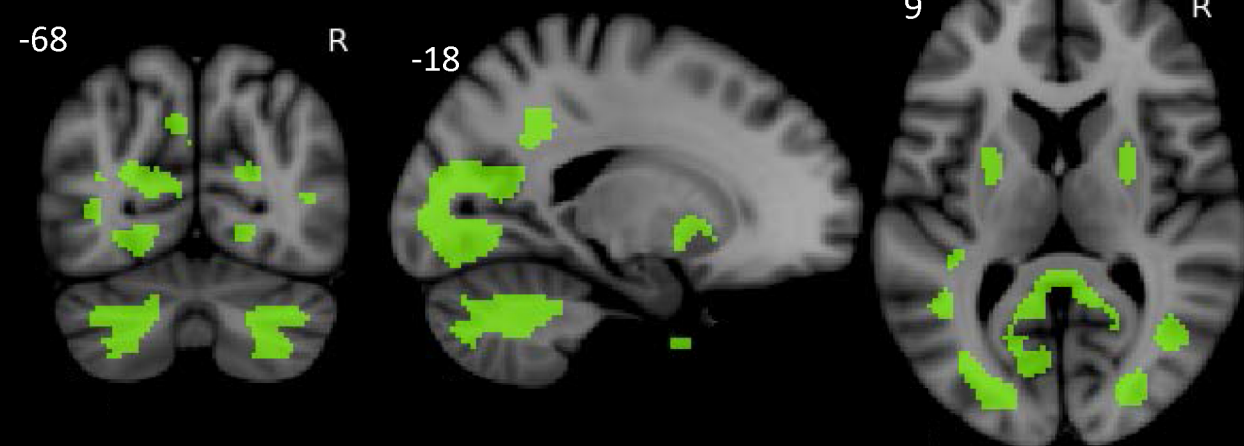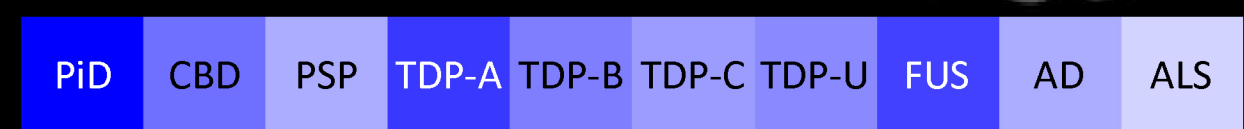

Component 6

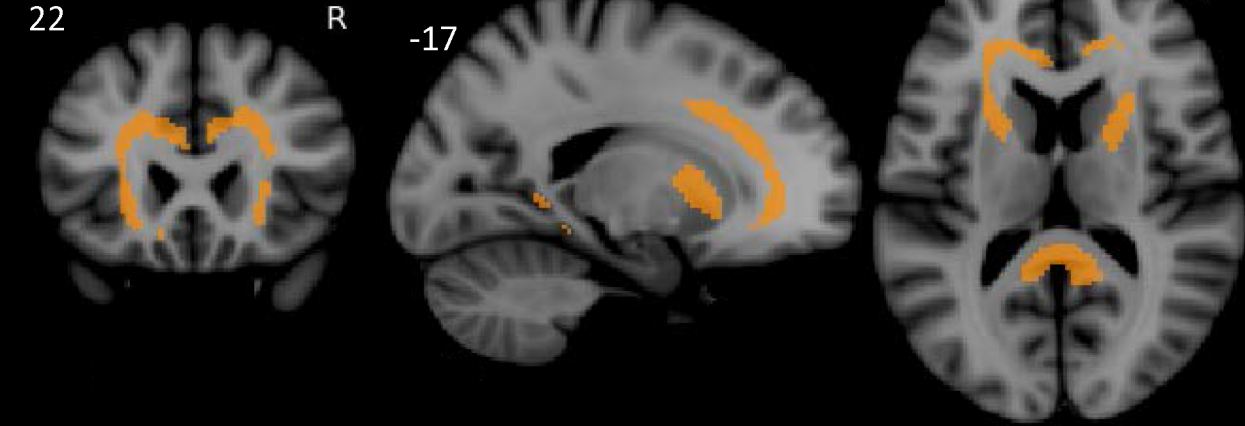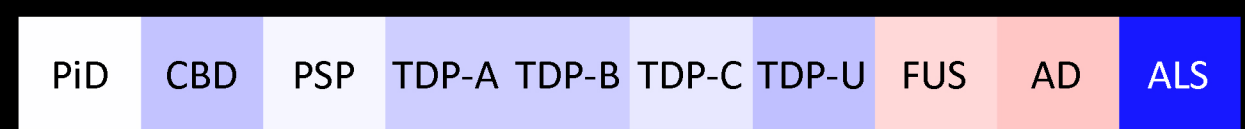

Component 2

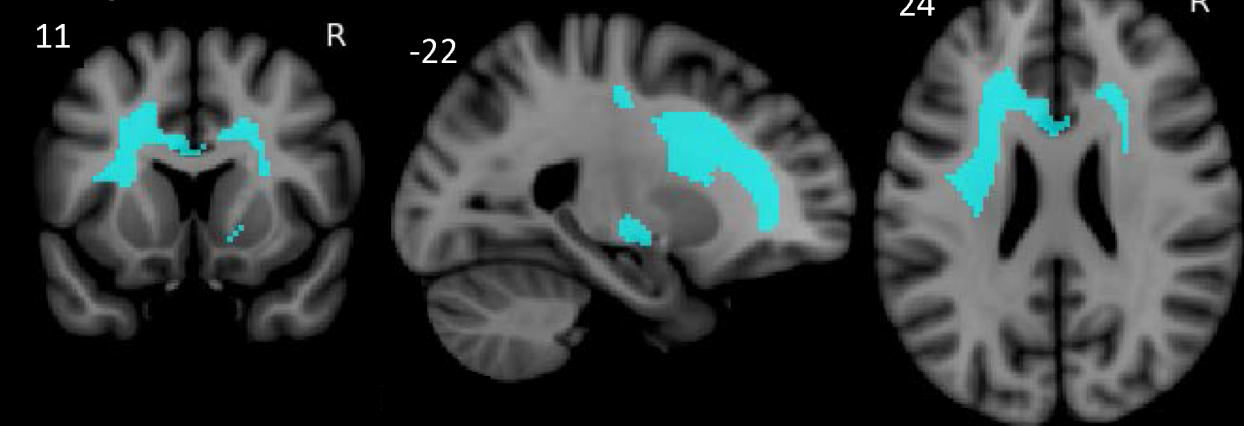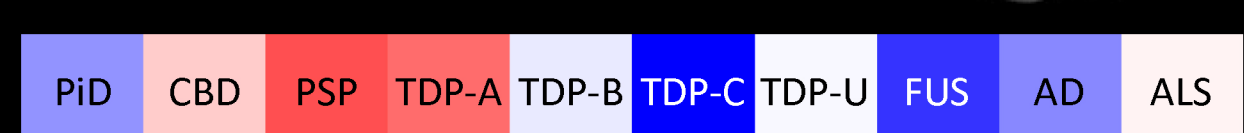

Component 7

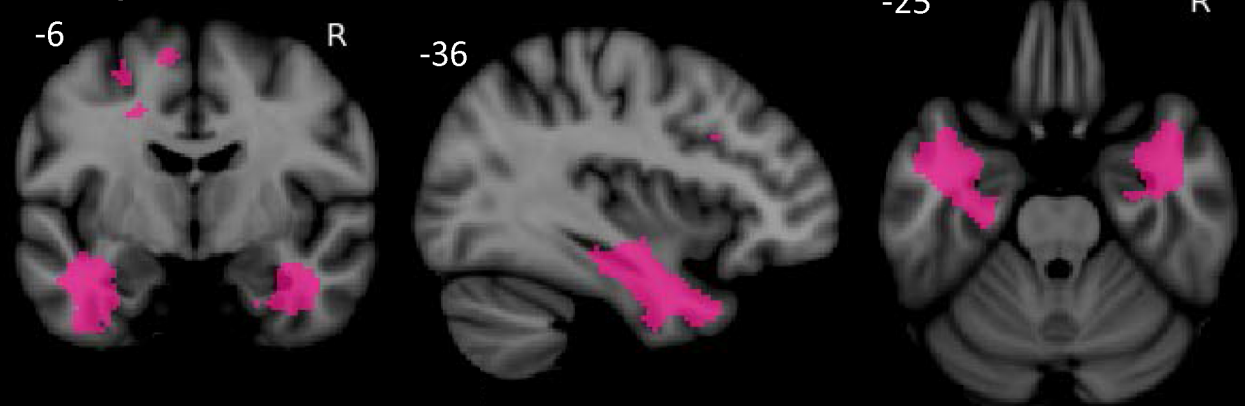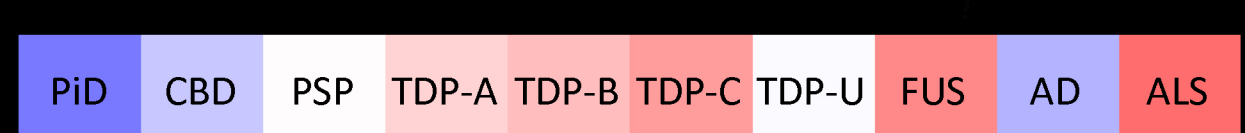

Component 3

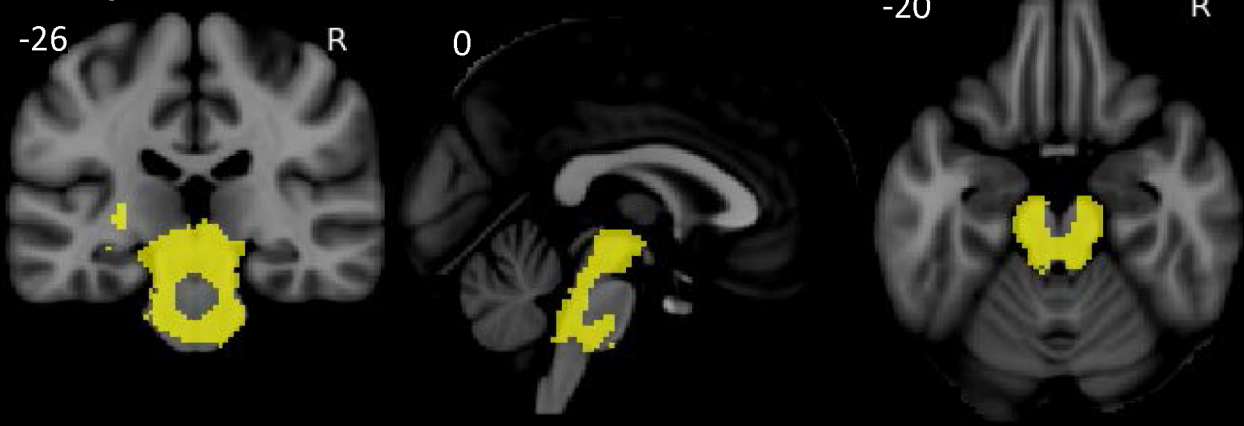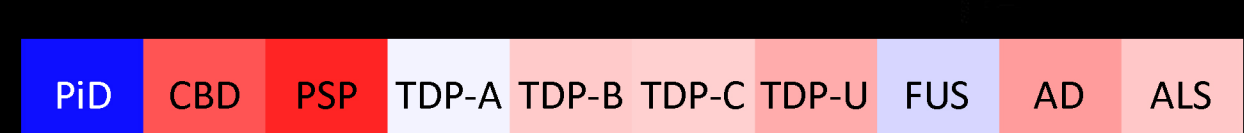

Component 8

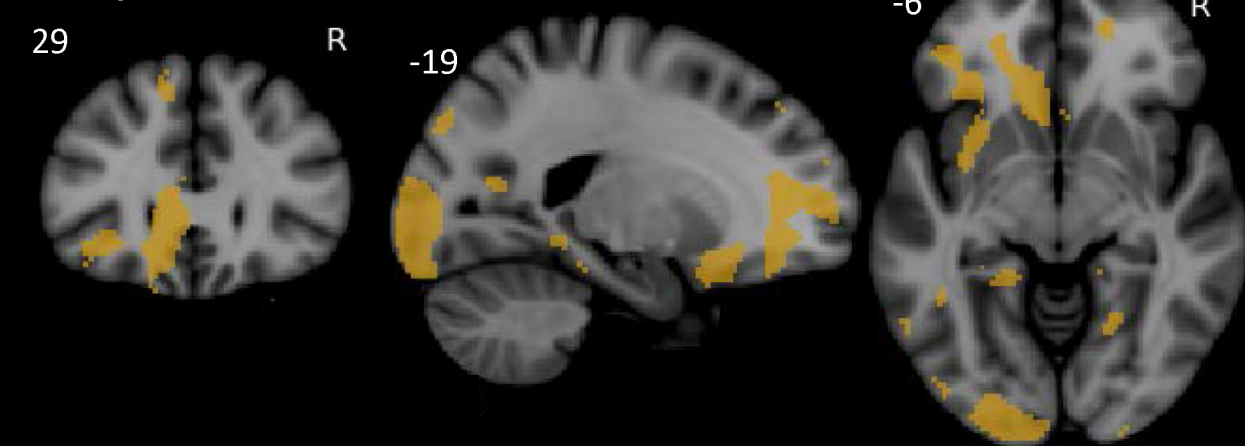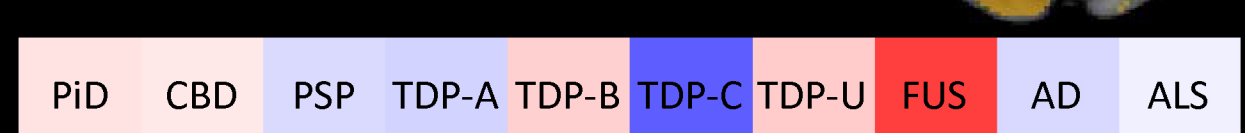

Component 4

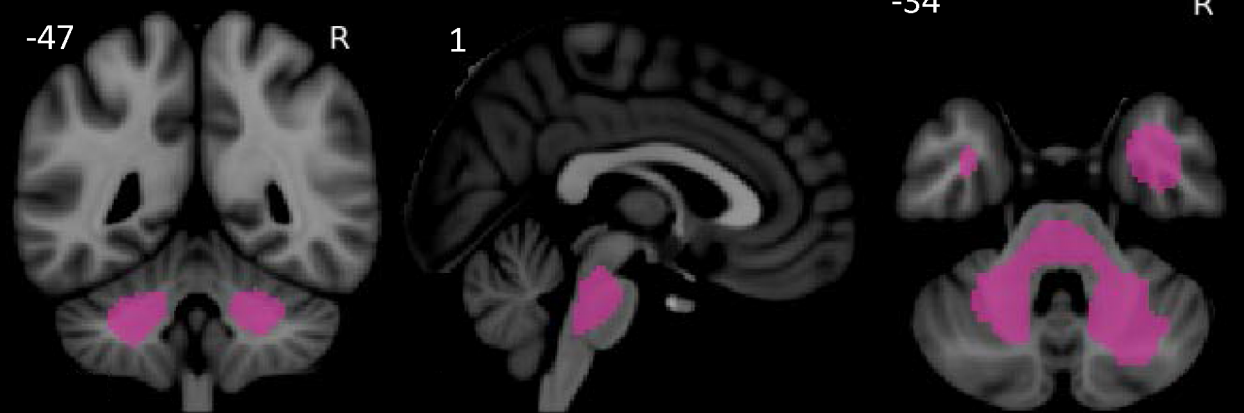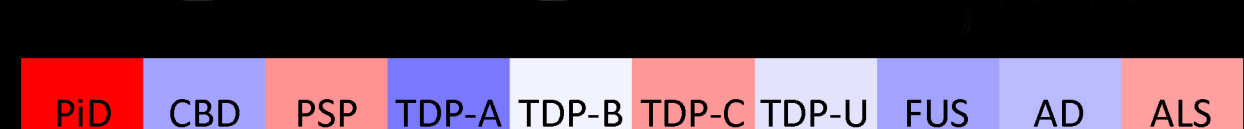

Component 9

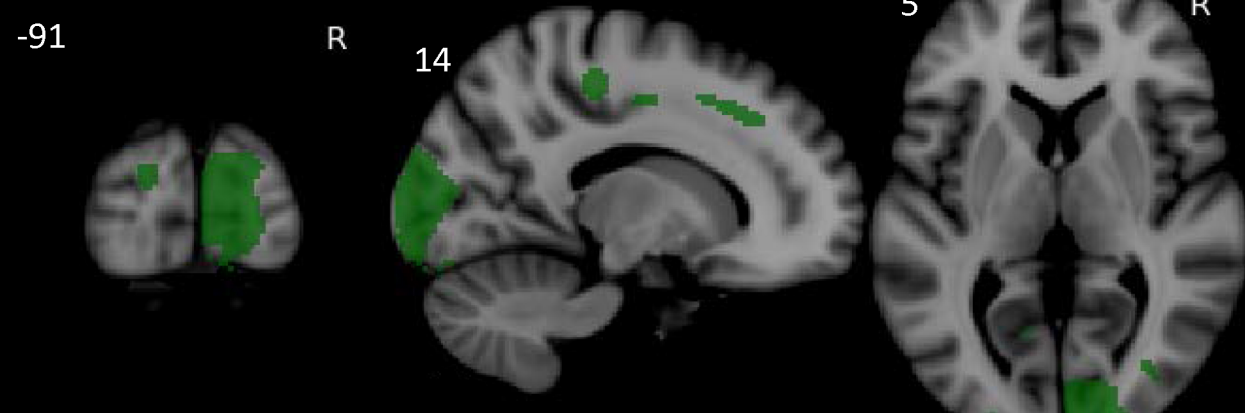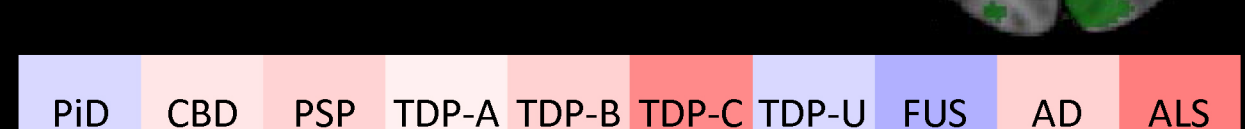

Component 5

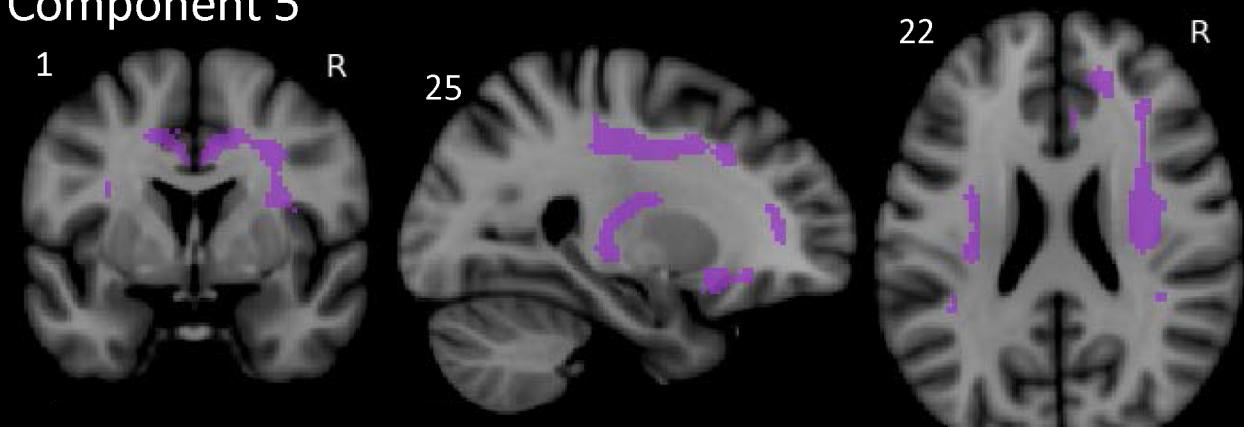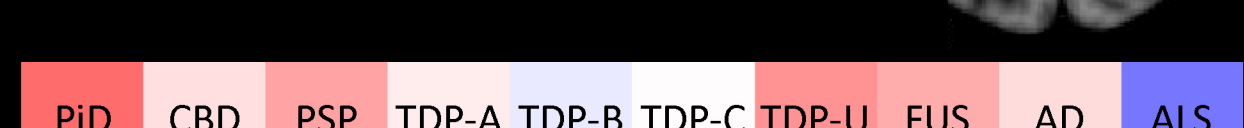

Component 10

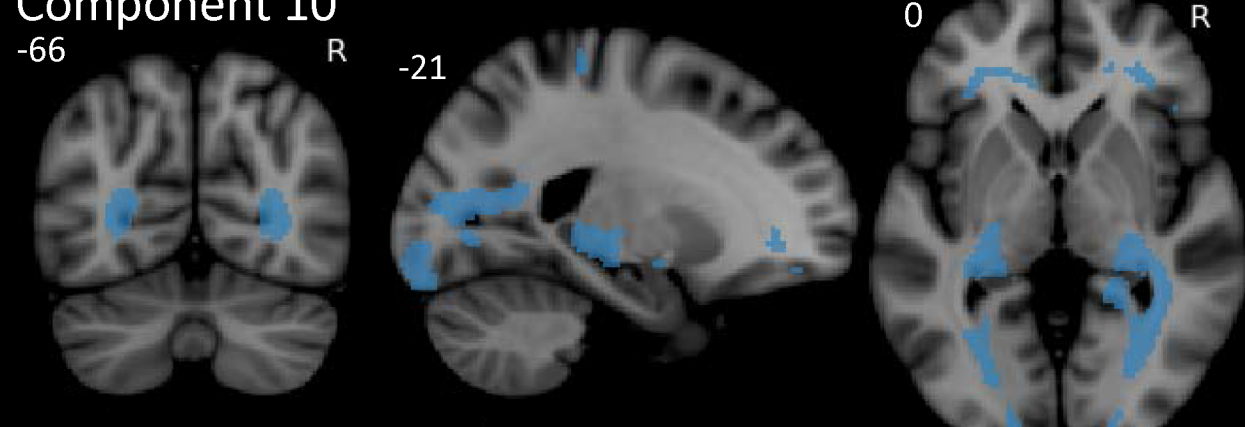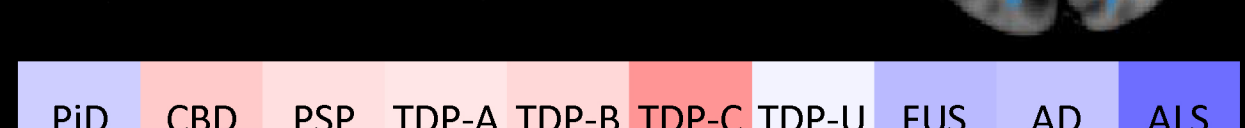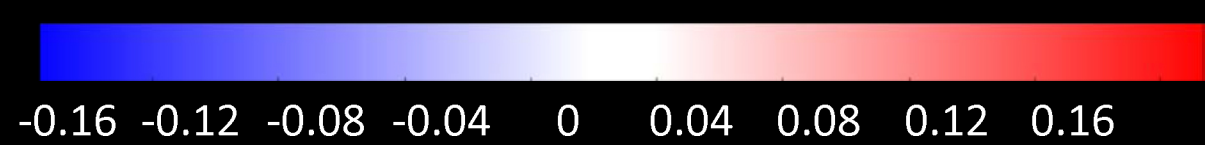

-0.16 -0.12 -0.08 -0.04 0 0.04 0.08 0.12 0.16
