# Supplementary material
Source: PubMed Central journal article supplement (PMC5841140)

## Results from bvFTD cohort, n=89

| <u>Correct classification</u>                   | <u>Incorrect Classification</u>           |
|-------------------------------------------------|-------------------------------------------|
| 15 AD                                           | 3 CBD, 2 PSP, 1 Pick's                    |
| 7 TDP-B, 1 TDP-A, 3 TDP-U<br>1 TDP-B<br>3 TDP-A | 2 TDP-A, 2 TDP-U, 1 ALS<br>1 TDP-U        |
| 3 FTDP-17                                       |                                           |
| 3 TDP-B, 2 TDP-U                                | 3 ALS, 1 TDP-B                            |
| 7 TDP-C<br>1 Pick's                             | 1 aFTLD-U, 1 TDP-B<br>1 TDP-C             |
| 2 PSP<br>1 TDP-B                                |                                           |
| 1 aFTLD-U                                       |                                           |
| 5 Pick's<br>1 aFTLD_U                           | 1 PSP                                     |
| 3 TDP-B<br>3 CBD, 1 PSP                         | 1 TDP-B, 1 TDP-A, 1 TDP-U<br>2 CBD, 1 PSP |

Top choice from Discriminant function analysis among remaining possibilities

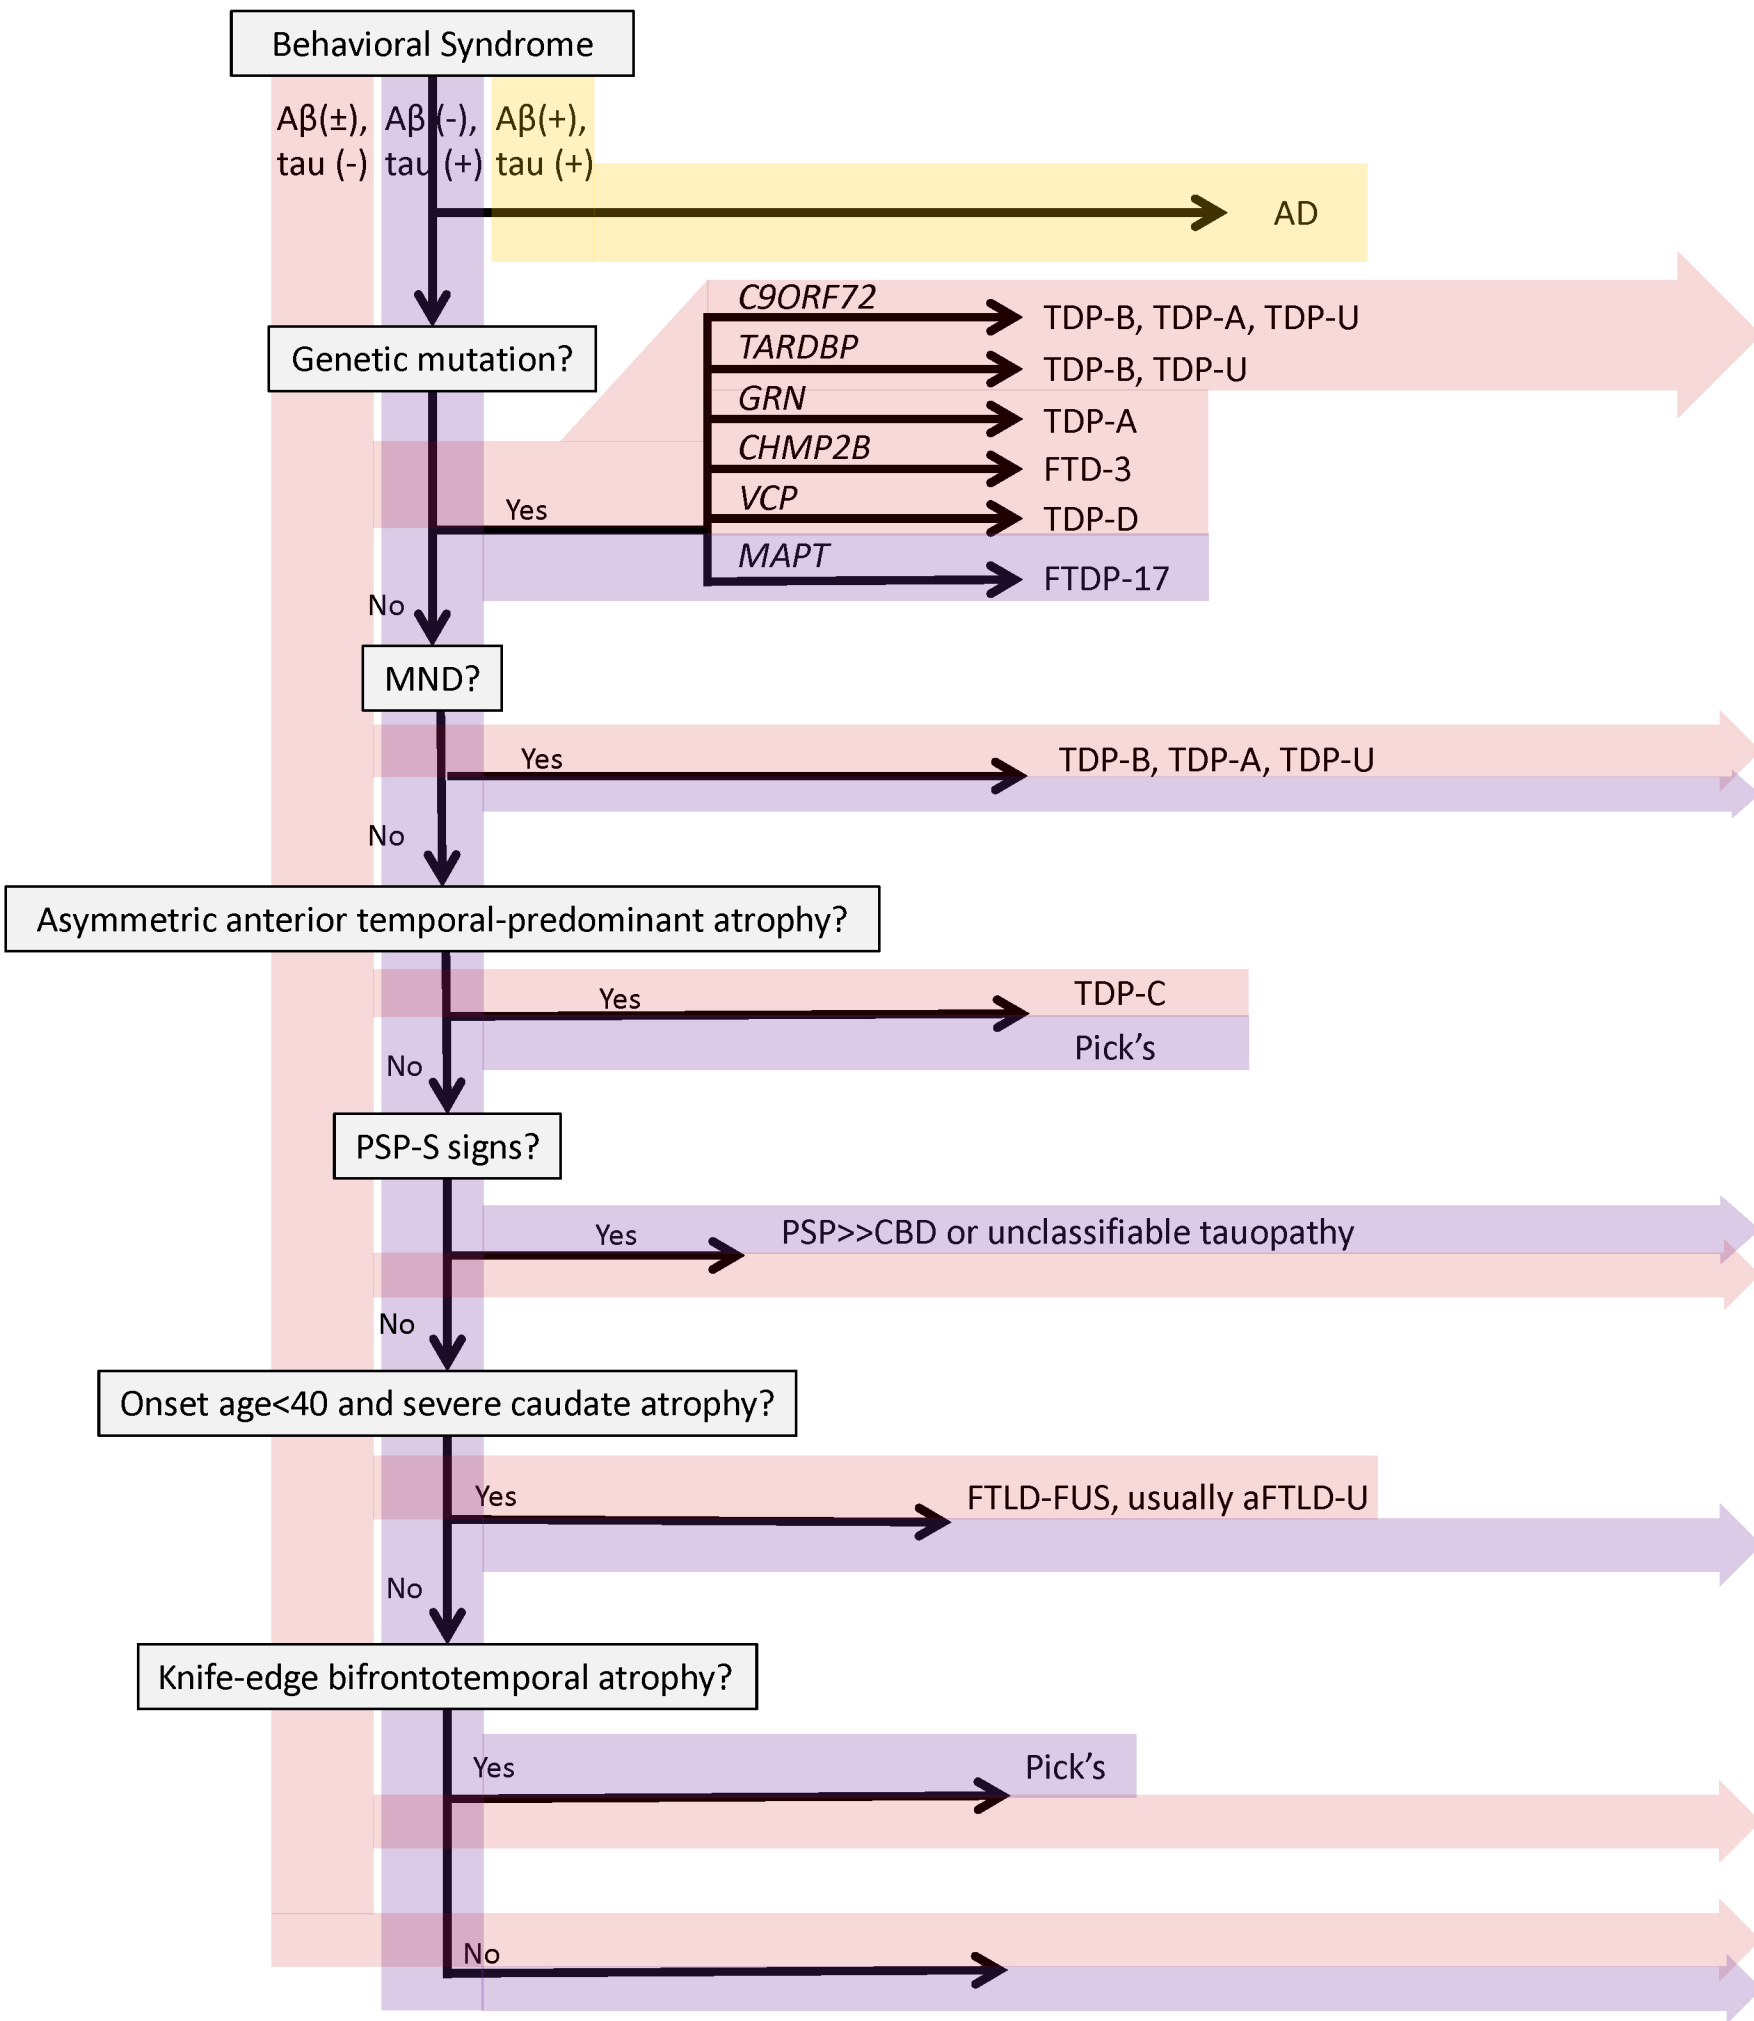

Supplement: brain-2017-00549-file014_awx254.pdf [file brain-2017-00549-file014_awx254.pdf]
