# Supplementary material
Source: PubMed Central journal article supplement (PMC5841140)

**A** Each diagnosis < Remaining diagnoses by LDA

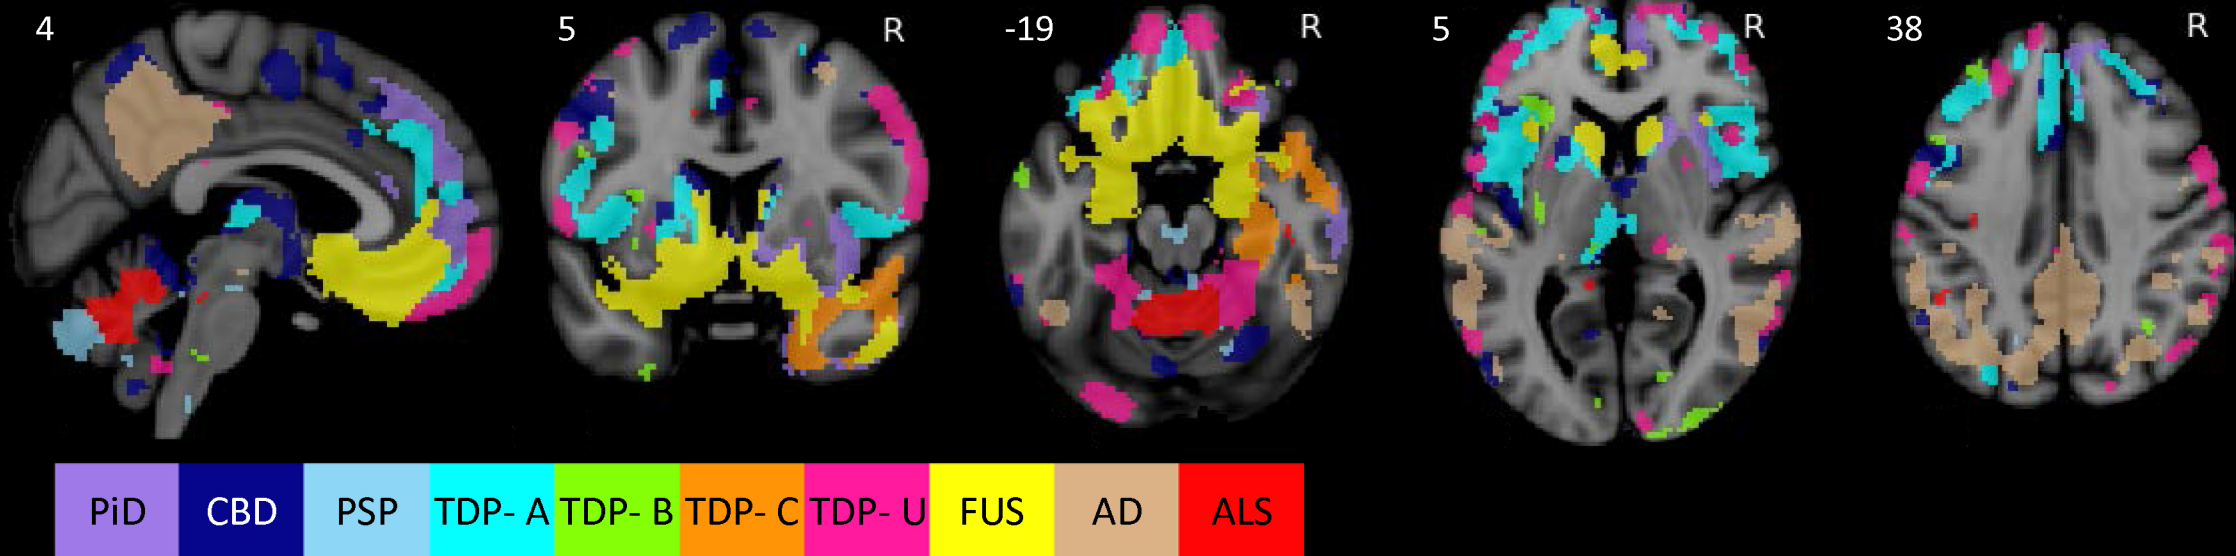

**B** Each diagnosis > Remaining diagnoses by LDA

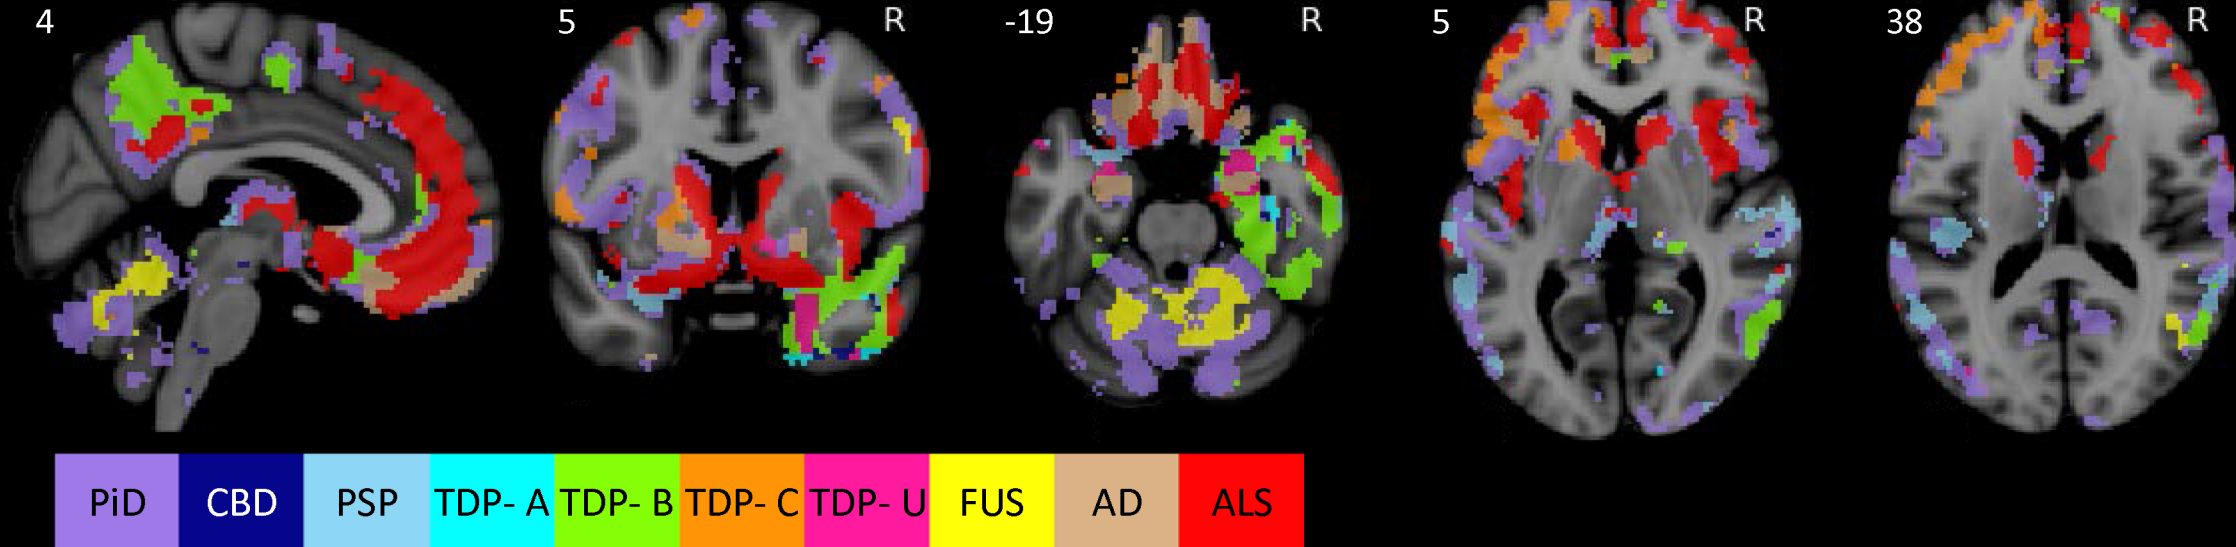

Supplement: brain-2017-00549-file012_awx254.pdf [file brain-2017-00549-file012_awx254.pdf]
